# Supplementary material for: Deamination of 1-Aminoalkylphosphonic Acids: Reaction Intermediates and Selectivity
Source: MDPI journal article supplement (doi:10.3390/molecules27248849), 2022-12-13
Supplement: s1 [file s1]

# Deamination of 1-Aminoalkylphosphonic Acids: Reaction Intermediates and Selectivity

Anna Brol and Tomasz K. Olszewski \*

Department of Physical and Quantum Chemistry, Faculty of Chemistry, Wrocław University of Science and Technology, ul. Wybrzeże Wyspiańskiego 27, 50-370 Wrocław, Poland.

\* Correspondence: tomasz.olszewski@pwr.edu.pl

## Table of contents

|                                                                                              |           |
|----------------------------------------------------------------------------------------------|-----------|
| <b>1. General informations.</b>                                                              | <b>2</b>  |
| <b>2. Deamination of 1-aminoalkylphosphonic acids and 2-aminoalkanoic acids in 5M HCl...</b> | <b>2</b>  |
| ABr738. Deamination of 1a in 5M hydrochloric acid.                                           | 3         |
| ABr742. Deamination of 1b in 5M hydrochloric acid.                                           | 7         |
| ABr746. Deamination of 2a in 5M hydrochloric acid.                                           | 11        |
| ABr748. Deamination of 2b in 5M hydrochloric acid.                                           | 12        |
| <b>3. Deamination of 1-aminoalkylphosphonic acids in water.</b>                              | <b>14</b> |
| ABr1178. Deamination of 1a in water.                                                         | 15        |
| ABr1204. Deamination of 1m water.                                                            | 18        |
| ABr1206. Deamination of 1o in water.                                                         | 22        |
| ABr1208. Deamination of 1b in water.                                                         | 25        |
| ABr1210. Deamination of 1d in water.                                                         | 29        |
| ABr1212. Deamination of 1c in water.                                                         | 32        |
| ABr1214. Deamination of 1i in water.                                                         | 35        |
| ABr1216. Deamination of 1l in water.                                                         | 39        |
| ABr1218. Deamination of 1k in water.                                                         | 43        |
| ABr1220. Deamination of 1j in water.                                                         | 46        |
| ABr1222. Deamination of 1q in water.                                                         | 49        |
| ABr1224. Deamination of 1f in water.                                                         | 52        |
| ABr1226. Deamination of 1n in water.                                                         | 55        |
| ABr1228. Deamination of 1h in water.                                                         | 60        |
| ABr1234. Deamination of 1p in water.                                                         | 62        |
| ABr1236. Deamination of 1g in water.                                                         | 65        |
| ABr1248. Deamination of 1e in water.                                                         | 70        |
| <b>4. References.</b>                                                                        | <b>74</b> |

## 1. General Informations

The  $^1\text{H}$ ,  $^{13}\text{C}\{^1\text{H}\}$ ,  $^{31}\text{P}$  NMR and DEPT-135 spectra were collected on a Jeol 400yh instrument (400 MHz for  $^1\text{H}$  NMR, 162 MHz for  $^{31}\text{P}$  NMR and 100 MHz for  $^{13}\text{C}\{^1\text{H}\}$  NMR) and were processed with dedicated software (Delta 5.0.5). NMR experiments recorded in  $\text{D}_2\text{O}$  were referenced to the respective residual  $^1\text{H}$  signal of the solvent. Multiplicities were reported using the following abbreviations: s (singlet), d (doublet), t (triplet), q (quartet), and m (multiplet). The reported coupling constants ( $J$ ) values were those observed from the splitting patterns in the spectrum and may not reflect the true coupling constant values. The composition of post-reaction mixtures (as conversion of substrate to the given product) were calculated based on  $^{31}\text{P}$  NMR (recorded in  $\text{D}_2\text{O}$ ) of the crude reaction mixture. Structural assignments of **5''g** were made with additional information from gCOSY, gHSQC, and gHMBC experiments.

**Reagents.** Aminomethylphosphonic acid (**1h**) was obtained in the reaction of benzamide, formaldehyde and phosphorous trichloride [1]. 3-Amino-3-phosphonopropanoic acid (**1e**) was synthesized from diethyl acetamidomethylenemalonate [2]. Remaining 1-aminoalkylphosphonic acids **1** were obtained using Sorokas' protocol and the reaction of an appropriate carbonyl compound with acetamide, acetyl chloride and  $\text{PCl}_3$  in acetic acid [3].

1-Hydroxyalkylphosphonic acids **5**, which were used as reference materials for confirmation of reaction products structures, were synthesized by dealkylation of diethyl 1-hydroxyalkylphosphonates. The substrates were obtained in the reaction of triethyl phosphite with suitable aldehyde or ketone and hydrogen chloride [4].

## 2. Deamination of 1-Aminoalkylphosphonic Acids and 2-Aminoalkanoic Acids in 5M HCl

Preliminary deamination experiments were conducted in three-necked flask equipped with reflux condenser, thermometer, dropping funnel and magnetic stirrer, as described in the original protocol [5].

**General procedure.** Preliminary deamination experiments were conducted in three-necked flask equipped with reflux condenser, thermometer, dropping funnel and magnetic stirrer, as described in the original protocol [5]. The solution of 1-aminoalkylphosphonic acid **1** or 2-aminoalkanoic acid **2** (10 mmol, 1 equiv) in 5M HCl (6.5 equiv, 13mL) was cooled in ice/NaCl cooling bath to temperature  $0\text{ }^\circ\text{C}$ . Cooled 4M  $\text{NaNO}_2$  solution in water (16 mmol, 1.6 equiv, 4.0 mL) was subsequently added dropwise for 2 min. Temperature of the reaction mixture was maintained under  $0\text{ }^\circ\text{C}$  for 5h, and then in  $25\text{ }^\circ\text{C}$  for 12 h. The samples for  $^1\text{H}$  and  $^{31}\text{P}$  NMR spectra were prepared by diluting post-reaction mixtures (0.10mL) in  $\text{D}_2\text{O}$  (0.40mL). The samples were re-measured after addition of reference materials. The composition of mixture was calculated based on the integration of signals on the  $^{31}\text{P}$  NMR spectra (for phosphorous substrates) or on the  $^1\text{H}$  NMR spectra (for 2-aminoalkanoic acids).

2.1. ABr738. Deamination of **1a** in 5M Hydrochloric Acid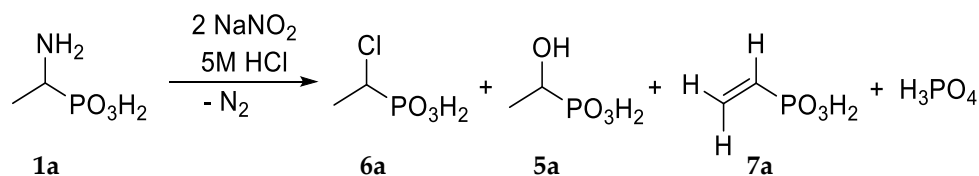

|                  | $\alpha = 0.99$ | 53%        | 24%        | 21%         | 1%       |
|------------------|-----------------|------------|------------|-------------|----------|
| $\delta_P$ [ppm] | 16.88 (dq)      | 20.56 (dq) | 25.57 (dq) | 17.16 (ddd) | 0.39 (s) |

After 12h in 21 °C, post-reaction mixture contained 1-chloroethylphosphonic acid (**6a**) (53%molP), 1-hydroxyethylphosphonic acid (**5a**) (24%molP), vinylphosphonic acid (**7a**) (21%molP), orthophosphoric acid (1%molP) and unreacted substrate **1a** (1%molP) (Figure S1 and Figure S2).

1-Hydroxyethylphosphonic acid (**7a**) was identified on  $^1\text{H}$  and  $^{31}\text{P}$  NMR spectra by re-measuring the NMR spectra of the reaction mixture with the addition of post-reaction mixture of 1-aminoethylphosphonic acid with  $\text{NaNO}_2$  in water (ABr1178), where this compound **5a** was the main product (Figure S3). Vinylphosphonic acid (**7a**) and 1-chlorophosphonic acid (**6a**) were identified by comparing chemical shifts, multiplicity and coupling constants on  $^1\text{H}$  and  $^{31}\text{P}$  NMR spectra with description in the literature (Table S1) [6, 7].

The presence of 1-chloroethylphosphonic acid (**6a**) was additionally confirmed by careful analysis of NMR spectra. In the post-reaction mixture there were two compounds having the structure  $-\text{CH}(\text{CH}_3)\text{PO}_3\text{H}_2$  ( $\delta_P = 20.56$  ppm and  $\delta_P = 25.57$  ppm). 1-Hydroxyethylphosphonic acid (**5a**) ( $\delta_P = 25.57$  ppm) was identified earlier. The presence of the unreacted substrate was excluded by re-measuring NMR spectra of post-reaction mixture with addition of 1-aminoethylphosphonic acid (**1a**) (Figure S4), which resulted in appearance of new peak ( $\delta_P = 16.88$  ppm). Therefore, the second product was 1-chloroethylphosphonic acid (**6a**) ( $\delta_P = 20.56$  ppm).

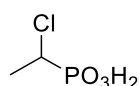

**1-Chloroethylphosphonic acid (6a).**  $^{31}\text{P}$  NMR ( $\text{D}_2\text{O}$ , ca. 0.8M HCl):  $\delta$  20.56 (dq,  $^2J_{\text{H-P}} = 9.4$  Hz,  $^3J_{\text{H-P}} = 15.9$  Hz);  $^1\text{H}$  NMR ( $\text{D}_2\text{O}$ , ca. 0.8M HCl)  $\delta$ : 3.85 (dq, 1H,  $^2J_{\text{H-H}} = 7.3$  Hz,  $^2J_{\text{H-P}} = 9.00$  Hz), 1.36 (dd, 3H,  $^3J_{\text{H-H}} = 7.3$  Hz,  $^3J_{\text{H-P}} = 16.5$  Hz).

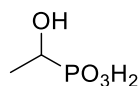

**1-Hydroxyethylphosphonic acid (5a).**  $^{31}\text{P}$  NMR ( $\text{D}_2\text{O}$ , ca. 0.8M HCl):  $\delta$  25.57 (dq,  $^2J_{\text{H-P}} = 5.6$  Hz,  $^3J_{\text{H-P}} = 17.6$  Hz);  $^1\text{H}$  NMR ( $\text{D}_2\text{O}$ , ca. 0.8M HCl)  $\delta$ : 3.77 (dq, 1H,  $^2J_{\text{H-P}} = 5.2$  Hz,  $^3J_{\text{H-H}} = 7.0$  Hz), 1.16 (dd, 3H,  $^3J_{\text{H-H}} = 7.0$  Hz,  $^3J_{\text{H-P}} = 17.4$  Hz).

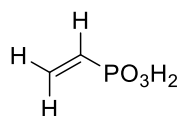

**Vinylphosphonic acid (7a).**  $^{31}\text{P}$  NMR ( $\text{D}_2\text{O}$ , ca. 0.8M HCl)  $\delta$ : 17.16 (ddd,  $^2J_{\text{H-P}} = 24.3$  Hz,  $^3J_{\text{H-P (cis)}} = 26.9$  Hz,  $^3J_{\text{H-P (trans)}} = 49.3$  Hz);  $^1\text{H}$  NMR ( $\text{D}_2\text{O}$ , ca. 0.8M HCl)  $\delta$ : 5.75–6.03 (m, 3H).

**Table S1.** Comparison of chemical shifts and coupling constants of 1-aminoethylphosphonic acid (**1a**) deamination products in 5M HCl on  $^1\text{H}$  and  $^{31}\text{P}$  NMR spectra with literature description.

| Structure           | 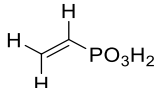 |  |                                        |               |
|---------------------|-----------------------------------------------------------------------------------|-------------------------------------------------------------------------------------|----------------------------------------|---------------|
| Source              | ABr738                                                                            | Reference [6]                                                                       | ABr738                                 | Reference [7] |
| Solvent             | D <sub>2</sub> O,<br>ca. 0.8M HCl                                                 | CDCl <sub>3</sub>                                                                   | D <sub>2</sub> O,<br>ca. 0.8M HCl      | "hydrolyzate" |
| <sup>31</sup> P NMR | 17.16 (ddd, <i>J</i> = 24.3, 26.9, 49.3 Hz)                                       | 17.3 (ddd, <i>J</i> = 20.0, 20.5, 51.3 Hz)                                          | 20.56 (dq, <i>J</i> = 9.4, 15.9 Hz)    | 20.1          |
| <sup>1</sup> H NMR  | 5.75-6.03 (m, 3H)                                                                 | 6.31 (ddd, 1H, <i>J</i> = 20.5, 16.2, 4.5 Hz)                                       | 3.85 (dq, 1H, <i>J</i> = 7.3, 9.00 Hz) |               |
|                     |                                                                                   | 6.05 (ddd, 1H, <i>J</i> = 51.3, 11.2, 4.5 Hz),                                      | 1.36 (dd, 3H, <i>J</i> = 7.3, 16.5 Hz) |               |
|                     |                                                                                   | 6.02 (ddd, 1H, <i>J</i> = 20.0, 16.2, 11.2 Hz)                                      |                                        |               |

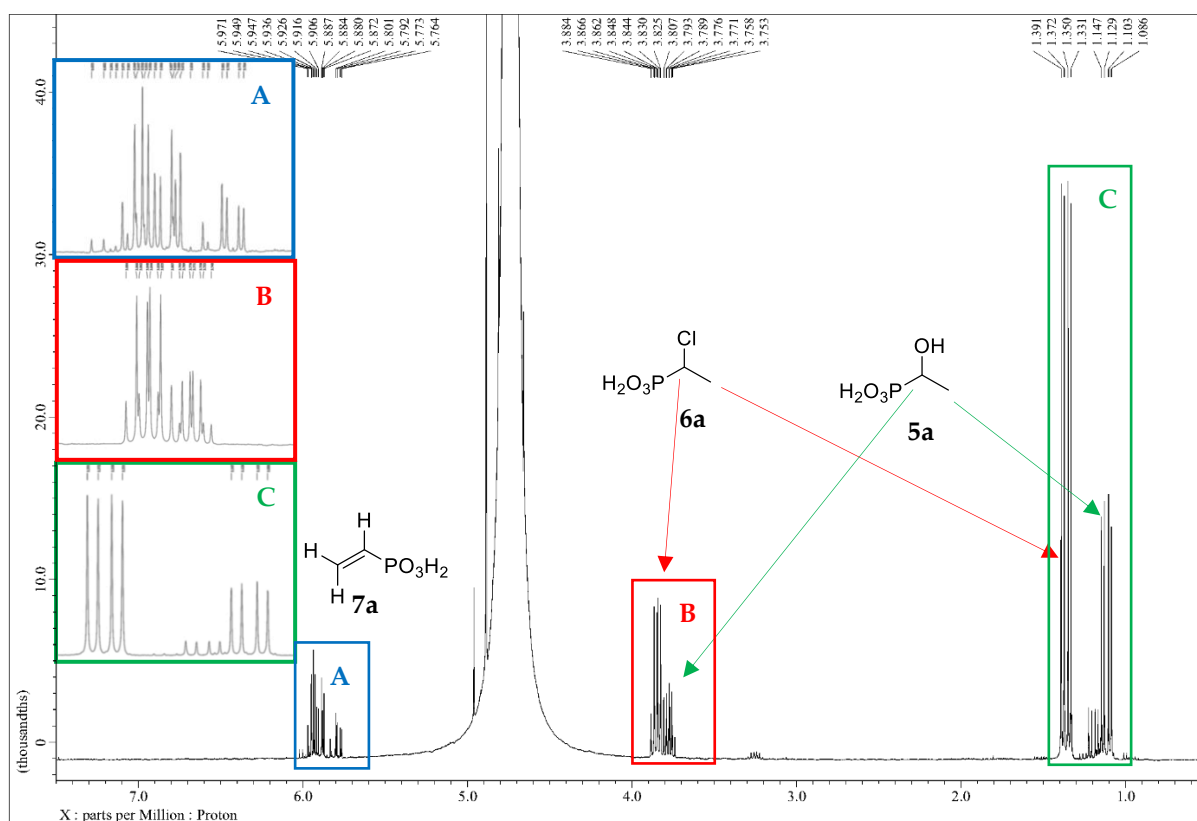

**Figure S1.**  $^1\text{H}$  NMR (D<sub>2</sub>O, 400MHz) spectra of post-reaction mixture of 1-aminoethylphosphonic acid (1a) with NaNO<sub>2</sub> in 5M hydrochloric acid.

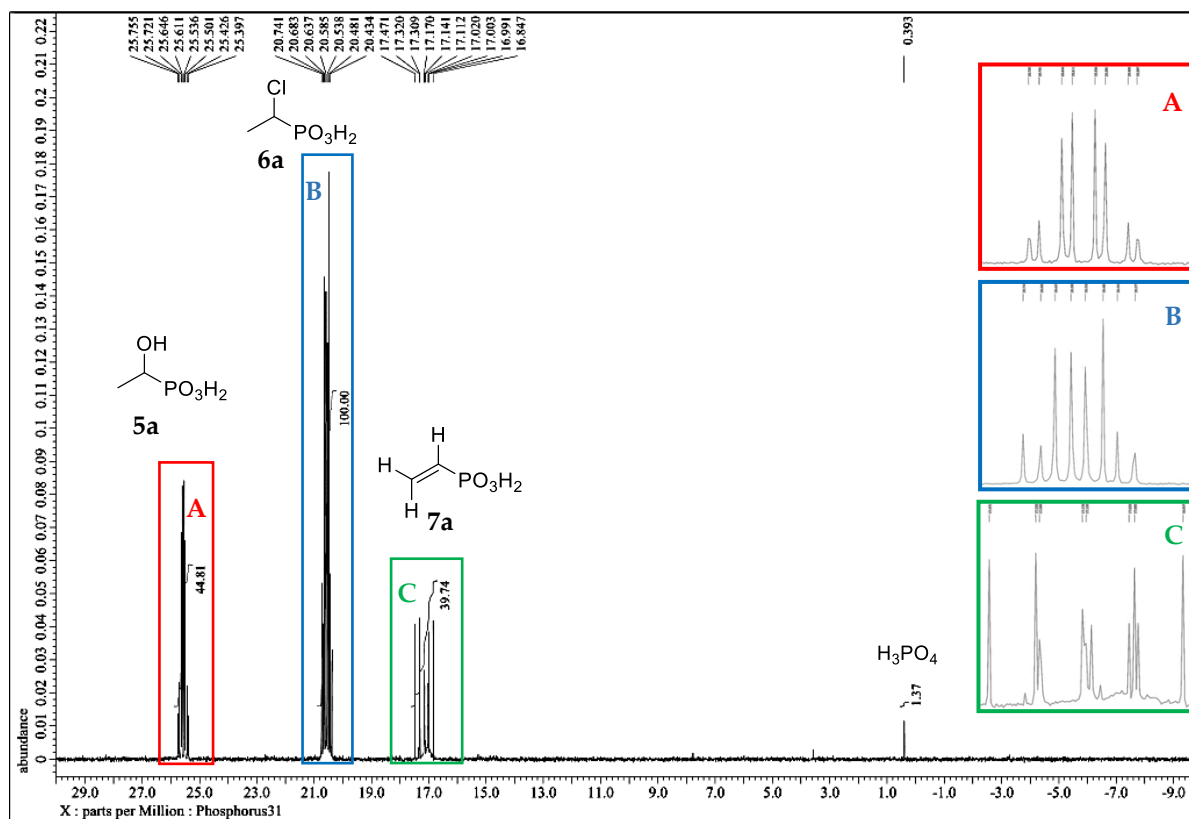

**Figure S2.**  $^{31}\text{P}$  NMR (D<sub>2</sub>O, 162MHz) spectra of post-reaction mixture of 1-aminoethylphosphonic acid (1a) with NaNO<sub>2</sub> in 5M hydrochloric acid.

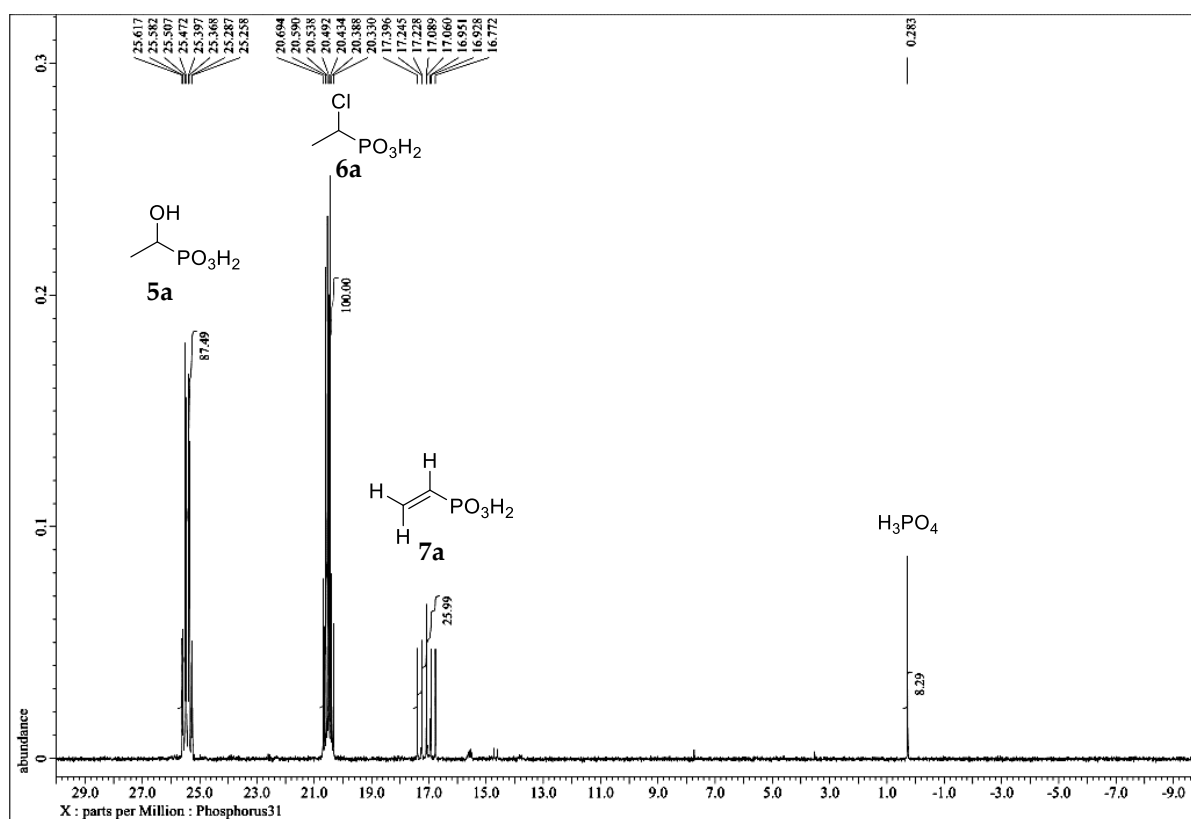

**Figure S3.**  $^{31}\text{P}$  NMR (D<sub>2</sub>O, 162MHz) spectra of post-reaction mixture of 1-aminoethylphosphonic acid (1a) with NaNO<sub>2</sub> in 5M hydrochloric acid with addition of 1-hydroxyethylphosphonic acid (5a) as standard.

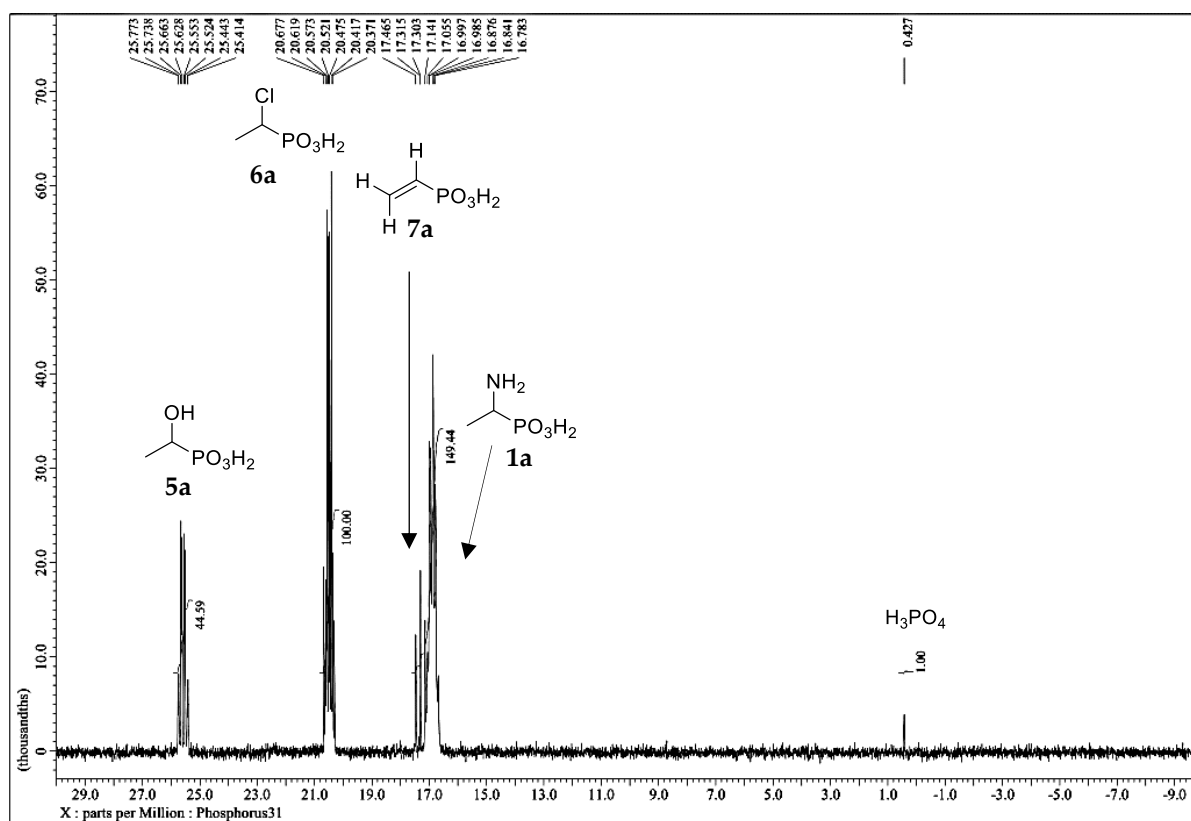

**Figure S4.**  $^{31}\text{P}$  NMR (D<sub>2</sub>O, 162MHz) spectra of post-reaction mixture of 1-aminoethylphosphonic acid (1a) with NaNO<sub>2</sub> in 5M hydrochloric acid with addition of substrate (1a) as standard.

2.2. ABr742. Deamination of **1b** in 5M Hydrochloric Acid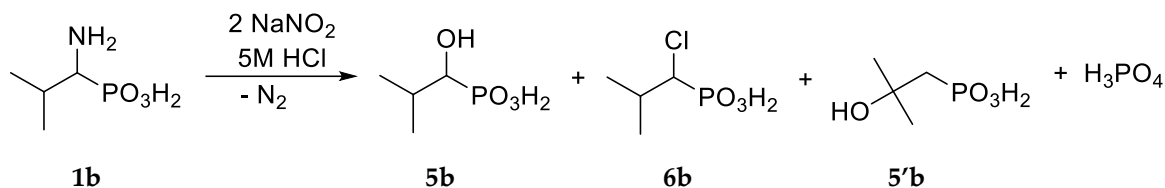

|                  | $\alpha = 0.61$ | 6%         | 2%         | 42%       | 9%       |
|------------------|-----------------|------------|------------|-----------|----------|
| $\delta_P$ [ppm] | 16.88 (dq)      | 25.02 (dq) | 19.37 (dq) | 27.00 (t) | 0.39 (s) |

After 12h in 21 °C, post-reaction mixture contained 1-hydroxy-2-methylpropylphosphonic acid (**5b**) (6%molP), 1-chloro-2-methylpropylphosphonic acid (**6b**) (2%molP), 2-hydroxy-2-methylpropylphosphonic acid (**5'b**) (42%molP) and orthophosphoric acid (9%molP) (Figure S5 and Figure S7).

Unreacted 1-amino-2-methylpropylphosphonic acid was identified on  $^1\text{H}$  and  $^{31}\text{P}$  NMR spectra by re-measuring the NMR spectra of the reaction mixture with the addition of substrate (Figure S6 and Figure S8).

1-Hydroxy-2-methylpropylphosphonic acid (**5b**) was identified by comparing chemical shifts, multiplicity and coupling constants on  $^1\text{H}$  and  $^{31}\text{P}$  NMR spectra with description in the literature (Table S2).

Spectra of 2-hydroxy-2-methylpropylphosphonic acid (**5'b**) and 1-chloro-2-methylpropylphosphonic acid (**6b**) have not been described in the literature. Therefore, these compounds were identified by analysis of the signals multiplicity on the  $^1\text{H}$  and  $^{31}\text{P}$  NMR spectra. Moreover,  $^1\text{H}$  and  $^{31}\text{P}$  NMR spectra of 2-hydroxy-2-methylpropylphosphonic acid (**5'b**) were compared with spectra of similar 2-hydroxypropylphosphonic acid (Table S2).

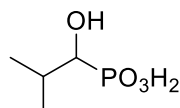

**1-Hydroxy-2-methylpropylphosphonic acid (5b).**  $^{31}\text{P}$  NMR ( $\text{D}_2\text{O}$ , ca. 0.8M HCl):  $\delta$  25.02 (dd,  $^2J_{\text{H-P}} = 8.4$  Hz,  $^3J_{\text{H-P}} = 8.4$  Hz);  $^1\text{H}$  NMR ( $\text{D}_2\text{O}$ , ca. 0.8M HCl):  $\delta$  3.46 (dd, 1H,  $^2J_{\text{H-P}} = 8.3$  Hz,  $^3J_{\text{H-H}} = 5.8$  Hz), 1.70-1.93 (m, 1H), 0.81 (d, 3H,  $^3J_{\text{H-H}} = 6.7$  Hz), 0.80 (d, 3H,  $^3J_{\text{H-H}} = 6.7$  Hz).

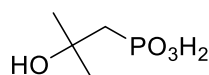

**2-Hydroxy-2-methylpropylphosphonic acid (5'b).**  $^{31}\text{P}$  NMR ( $\text{D}_2\text{O}$ , ca. 0.8M HCl):  $\delta$  27.00 (t,  $^2J_{\text{H-P}} = 19.2$  Hz);  $^1\text{H}$  NMR ( $\text{D}_2\text{O}$ , ca. 0.8M HCl):  $\delta$  1.95 (d, 3H,  $^2J_{\text{H-P}} = 18.7$  Hz, 2H), 1.16 (s, 6H).

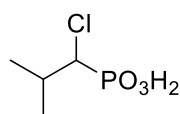

**1-Chloro-2-methylpropylphosphonic acid (6b).**  $^{31}\text{P}$  NMR ( $\text{D}_2\text{O}$ , ca. 0.8M HCl):  $\delta$  19.37 (dd,  $^2J_{\text{H-P}} = 10.3$  Hz,  $^3J_{\text{H-P}} = 7.5$  Hz);  $^1\text{H}$  NMR ( $\text{D}_2\text{O}$ , ca. 0.8M HCl):  $\delta$  3.83 (dd, 1H,  $^2J_{\text{H-P}} = 11.3$  Hz,  $^3J_{\text{H-H}} = 3.7$  Hz), 2.10-2.21 (m, 1H), 0.82-0.92 (6H).

**Table S2.** Comparison of chemical shifts and coupling constants on  $^1\text{H}$  and  $^{31}\text{P}$  NMR spectra of the reaction products of 1-amino-2-methylpropylphosphonic acid (**1b**) with  $\text{NaNO}_2$  in 5M HCl with compounds described in the literature.

| Structure           | 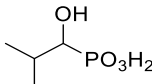 |  |  |                                                  |
|---------------------|-----------------------------------------------------------------------------------|------------------------------------------------------------------------------------|-------------------------------------------------------------------------------------|--------------------------------------------------|
| Source              | ABr742                                                                            | Reference [8]                                                                      | ABr742                                                                              | Reference [9]                                    |
| Solvent             | (D <sub>2</sub> O, 0.8M HCl)                                                      | D <sub>2</sub> O                                                                   | D <sub>2</sub> O                                                                    | D <sub>2</sub> O                                 |
| <sup>31</sup> P NMR | 25.02 (t, <i>J</i> = 8.4 Hz)                                                      | 19.6                                                                               | 21.24<br>(t, <i>J</i> = 17.8 Hz)                                                    | 19.9                                             |
| <sup>1</sup> H NMR  | 3.46 (dd, 1H,<br><i>J</i> = 8.3, 5.8 Hz)                                          | 3.23 (dd, 1H,<br><i>J</i> = 8.4, 6.0 Hz)                                           |                                                                                     | 3.80 (1H, dm,<br><i>J</i> = 6.5 Hz)              |
|                     | 1.70-1.93 (m, 1H)                                                                 | 1.79-1.86<br>(m, 1H)                                                               | 1.83<br>(d, 3H, <i>J</i> = 17.7 Hz)                                                 | 1.39 (2H, ddd, <i>J</i> = 18.0,<br>6.6, 15.3 Hz) |
|                     | 0.81 (d, 3H,<br><i>J</i> = 6.7 Hz)                                                | 0.84 (d, 3H,<br><i>J</i> = 6.6 Hz)                                                 | 1.22 (s, 6H)                                                                        | 0.97 (3H, d,<br><i>J</i> = 6.5 Hz)               |
|                     | 0.80 (d, 3H,<br><i>J</i> = 6.7 Hz)                                                | 0.83 (d, 3H,<br><i>J</i> = 6.6 Hz)                                                 |                                                                                     |                                                  |
|                     |                                                                                   |                                                                                    |                                                                                     |                                                  |



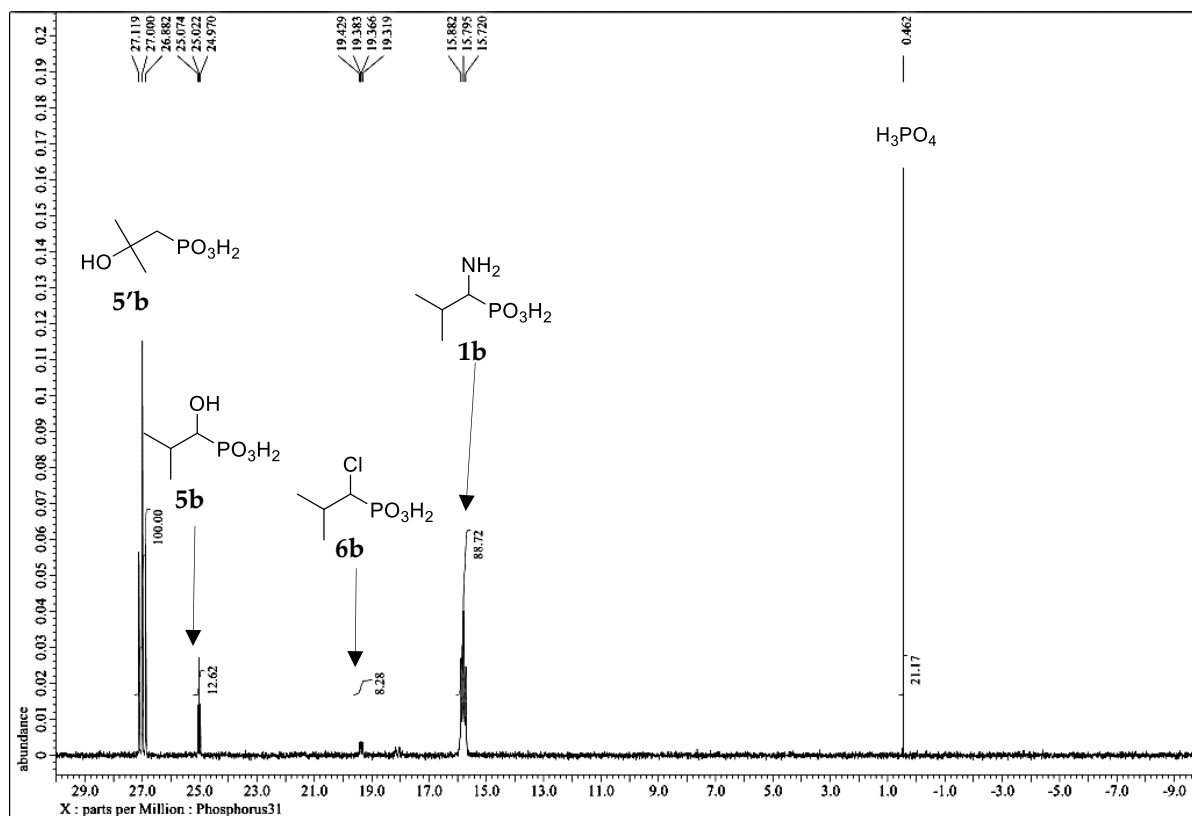

Figure S5.  $^{31}\text{P}$  NMR (D<sub>2</sub>O, 162MHz) spectra of the crude post-reaction mixture of 1-amino-2-methylpropylphosphonic acid (**1b**) with NaNO<sub>2</sub> in 5M HCl.

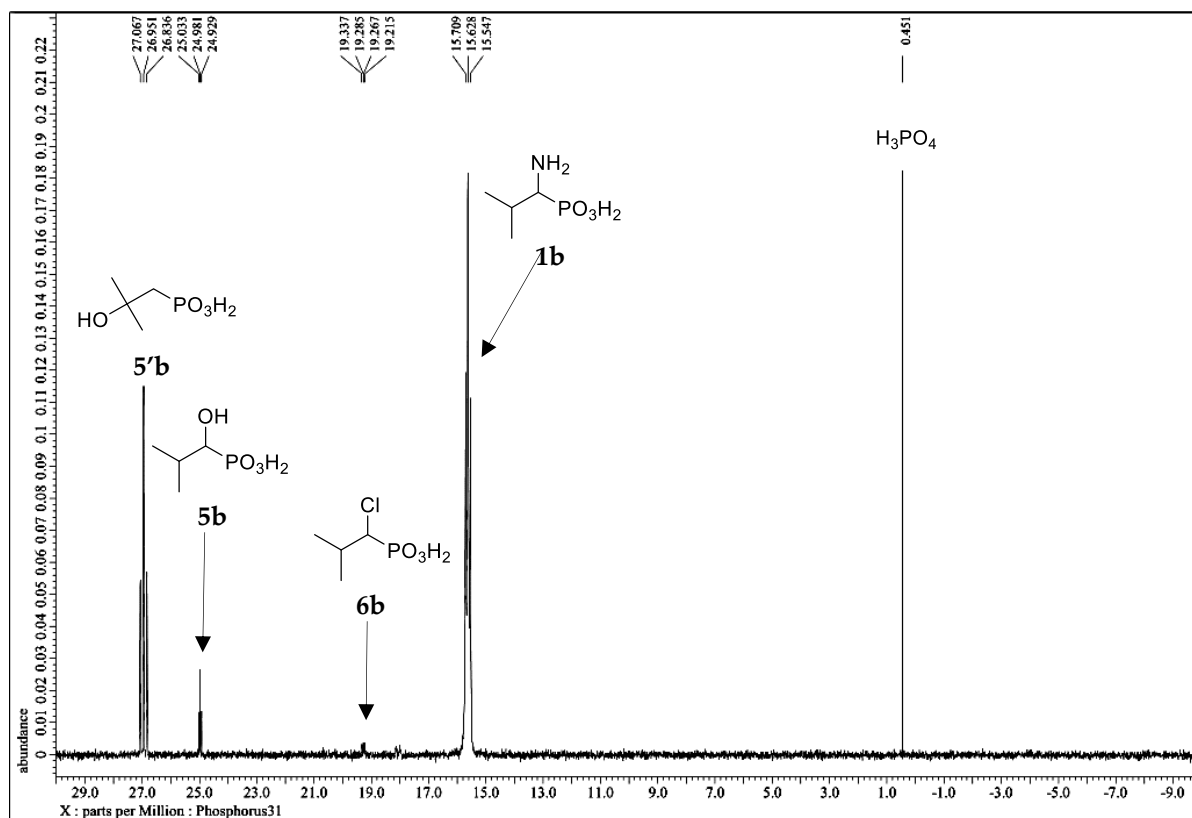

Figure S6.  $^{31}\text{P}$  NMR (D<sub>2</sub>O, 162MHz) spectra of the crude post-reaction mixture of 1-amino-2-methylpropylphosphonic acid (**1b**) with NaNO<sub>2</sub> in 5M HCl with addition of substrate (**1b**) as standard.

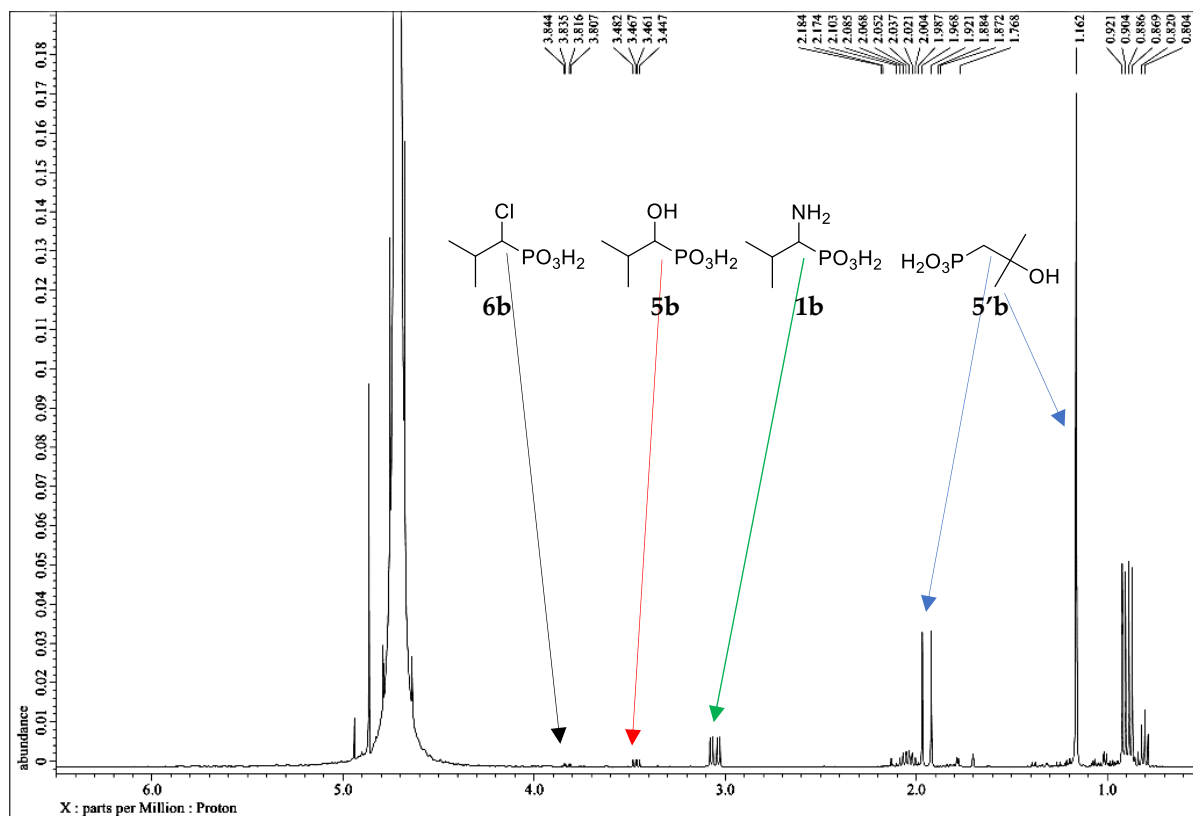

Figure S7.  $^1\text{H}$  NMR ( $\text{D}_2\text{O}$ , 400MHz) spectra of the crude post-reaction mixture of 1-amino-2-methylpropylphosphonic acid (**1b**) with  $\text{NaNO}_2$  in 5M HCl.

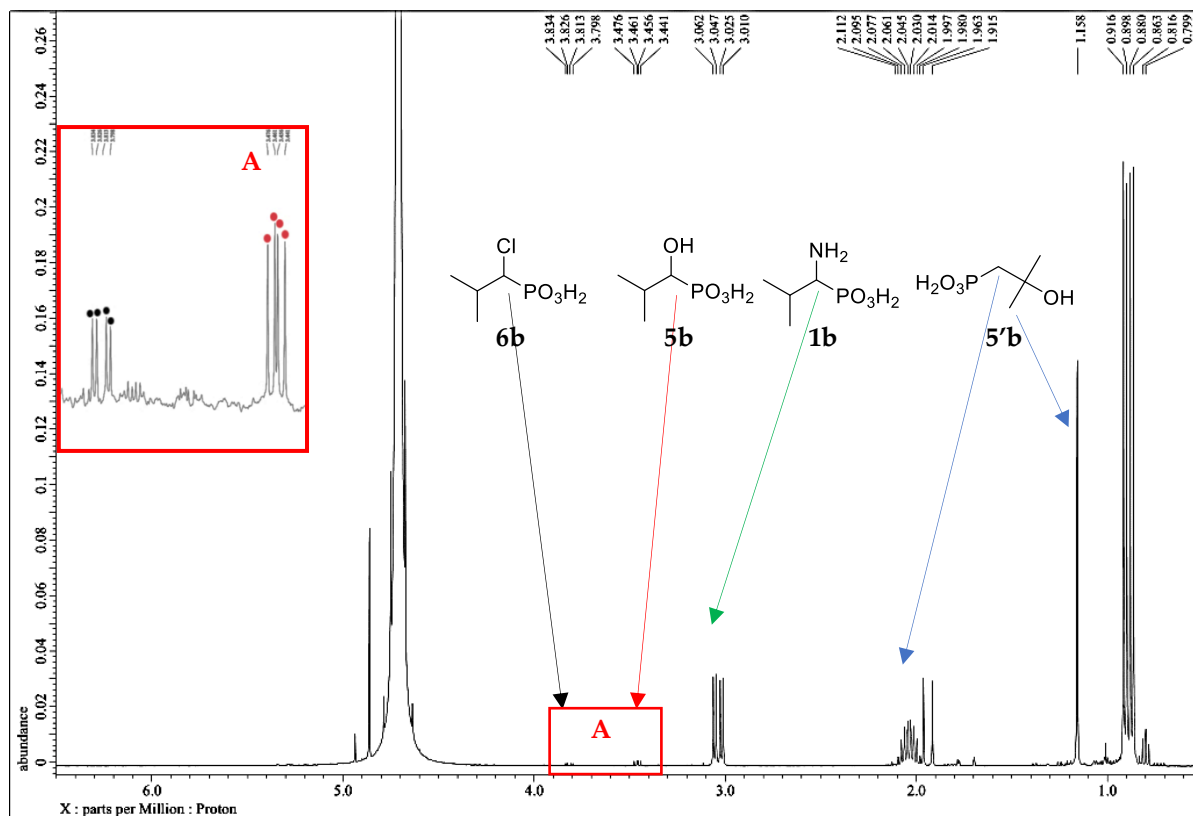

Figure S8.  $^1\text{H}$  NMR ( $\text{D}_2\text{O}$ , 400MHz) spectra of the crude post-reaction mixture of 1-amino-2-methylpropylphosphonic acid (**1b**) with  $\text{NaNO}_2$  in 5M HCl with addition of substrate (**1b**) as standard.

2.3. ABr746. Deamination of **2a** in 5M Hydrochloric Acid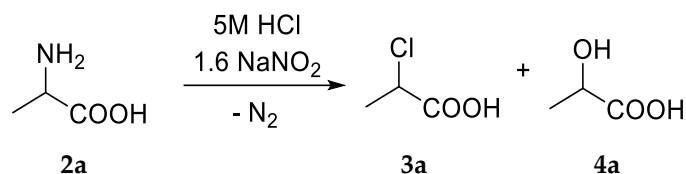 $\alpha = 0.53$ 

35%

18%

After 24 h in 21 °C, post-reaction mixture contained unreacted substrate **2a** (47%mol), 2-chloropropanoic acid (**3a**) (35%mol) and 2-hydroxypropanoic acid (**4a**) (18%mol) (Figure S9).

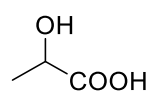

**2-Hydroxypropanoic acid (4a).**  $^1\text{H}$  NMR ( $\text{D}_2\text{O}$ , ca. 0.8M HCl)  $\delta$ : 4.12 (q, 1H,  $^3J_{\text{H-H}} = 7.0$  Hz), 1.15 (d, 3H,  $^3J_{\text{H-H}} = 7.0$  Hz).

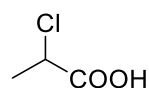

**2-Chloropropanoic acid (3a).**  $^1\text{H}$  NMR ( $\text{D}_2\text{O}$ , ca. 0.8M HCl)  $\delta$ : 4.35 (q, 1H,  $^3J_{\text{H-H}} = 7.0$  Hz), 1.41 (d, 3H,  $^3J_{\text{H-H}} = 7.0$  Hz).

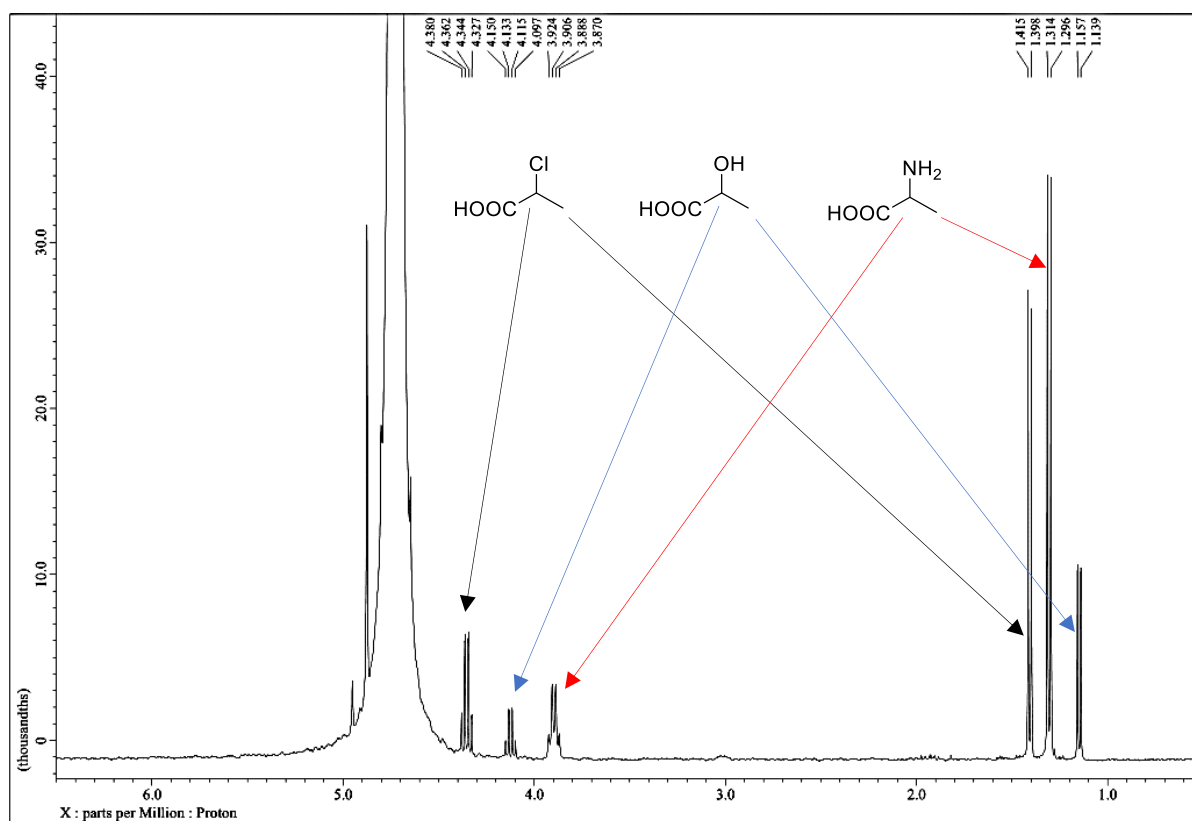

**Figure S9.**  $^1\text{H}$  NMR ( $\text{D}_2\text{O}$ , 400MHz) spectra of crude post-reaction mixture of alanine (**2a**) with  $\text{NaNO}_2$  in 5M hydrochloric acid.

2.4. ABr748. Deamination of **2b** in 5M Hydrochloric Acid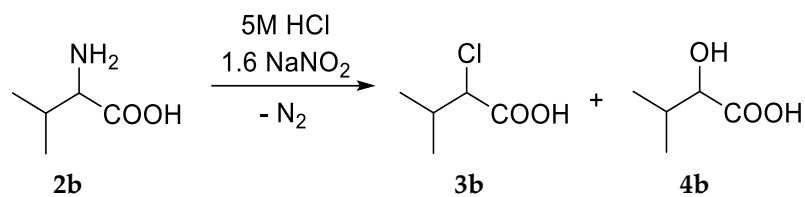

|                 |     |    |
|-----------------|-----|----|
| $\alpha = 0.57$ | 40% | 8% |
|-----------------|-----|----|

After 24 h in 21 °C, post-reaction mixture contained unreacted substrate **2b** (43%mol), 2-chloro-3-methylbutanoic acid (**3b**) (40%mol) and 2-hydroxy-3-methylbutanoic acid (**4b**) (8%mol) and unidentified compound (Figure S10).

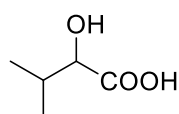

**2-Hydroxy-3-methylbutanoic acid (4b).** <sup>1</sup>H NMR (D<sub>2</sub>O, ca. 0.8M HCl)  $\delta$ : 3.86 (d, 1H, <sup>3</sup>J<sub>H-H</sub> = 4.0 Hz), 1.82 (doublet of septets, 1H, <sup>3</sup>J<sub>H-H</sub> = 7.0 Hz, <sup>3</sup>J<sub>H-H</sub> = 4.0 Hz), 0.71 (d, 3H, <sup>3</sup>J<sub>H-H</sub> = 7.0 Hz), 0.62 (d, 3H, <sup>3</sup>J<sub>H-H</sub> = 7.0 Hz).

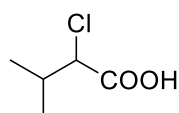

**2-Chloro-3-methylbutanoic acid (3b).** <sup>1</sup>H NMR (D<sub>2</sub>O, ca. 0.8M HCl)  $\delta$ : 4.17 (d, 1H, <sup>3</sup>J<sub>H-H</sub> = 5.5 Hz), 2.05 (doublet of septets, 1H, <sup>3</sup>J<sub>H-H</sub> = 6.7 Hz, <sup>3</sup>J<sub>H-H</sub> = 5.8 Hz), 0.76 (d, 3H, <sup>3</sup>J<sub>H-H</sub> = 6.7 Hz), 0.72 (d, 3H, <sup>3</sup>J<sub>H-H</sub> = 6.7 Hz).

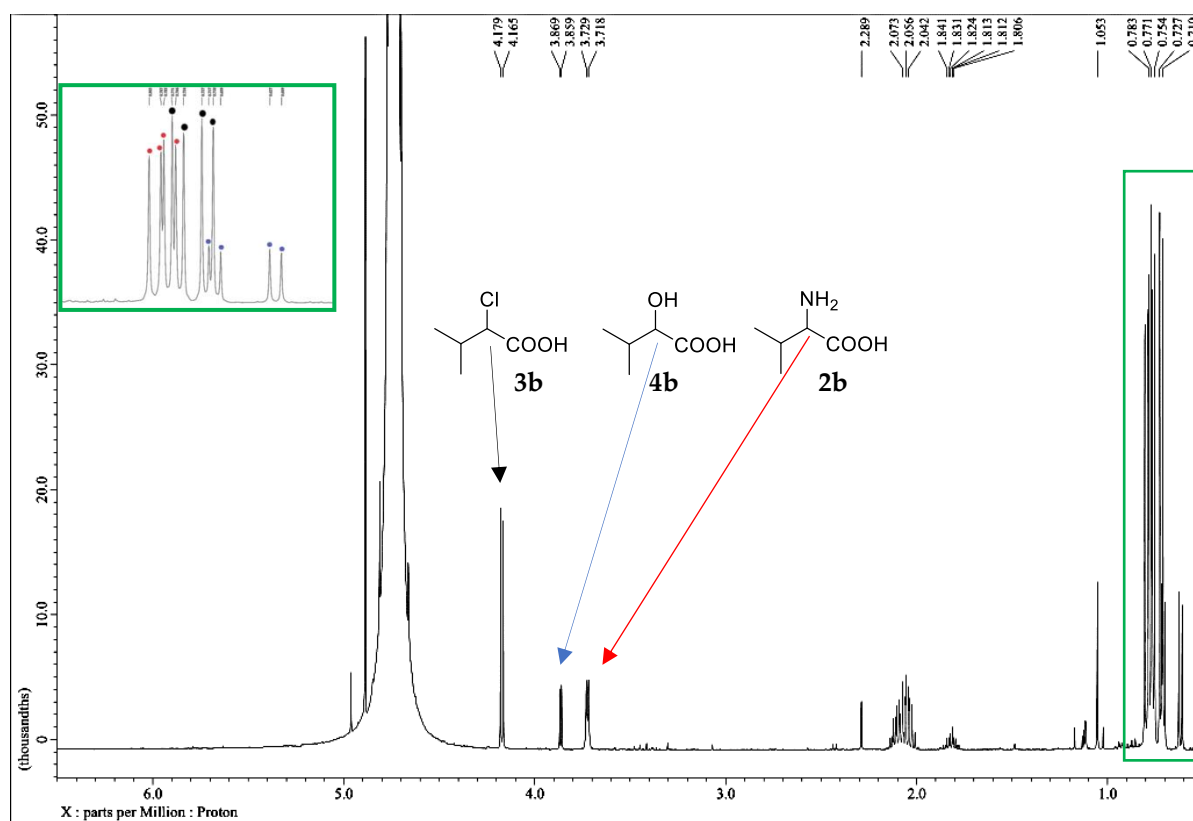

**Figure S10.**  $^1\text{H}$  NMR ( $\text{D}_2\text{O}$ , 400MHz) spectra of crude post-reaction mixture of valine (**2b**) with  $\text{NaNO}_2$  in 5M hydrochloric acid.

### 3. Deamination of 1-Aminoalkylphosphonic Acids in Water

**Apparatus.** Deamination reactions of 1-aminoalkylphosphonic acids **1** were conducted in round-bottom flask equipped with magnetic stirrer and calibrated gas burette (Figure S11). The flask was placed in a water bath at a temperature of about 20 °C. 1-Aminoalkylphosphonic acid **1** (3.0 mmol, 1 equiv) was added to 0.67 M solution of NaNO<sub>2</sub> (6.0 mmol, 2 equiv, 9.0 mL). Solution or suspension was stirred by the means of magnetic stirrer until the stoichiometric volume of gas was evolved and additionally for 12 h. <sup>1</sup>H and <sup>31</sup>P NMR spectra were recorded after that time and additionally after few days. The composition of mixture was calculated based on the integration of signals on the <sup>31</sup>P NMR spectra.

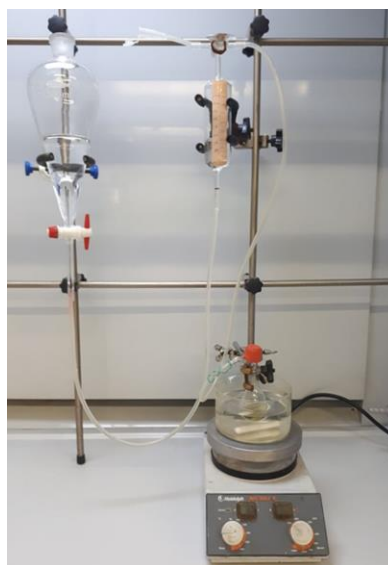

**Figure S11.** Apparatus used in the deamination reactions of 1-aminoalkylphosphonic acids **1** with sodium nitrite in water.

**General Procedure.** 1-aminoalkylphosphonic acid **1** (3.0 mmol, 1 equiv) was added to cooled in water bath 0.67M solution of NaNO<sub>2</sub> (6.0 mmol, 2 equiv, 9.0 mL). Solution or suspension was stirred by the means of magnetic stirrer until the stoichiometric volume of gas was evolved and additionally for 12 h. <sup>1</sup>H and <sup>31</sup>P NMR spectra were recorded after that time and additionally after few days. The composition of mixture was calculated based on the integration of signals on the <sup>31</sup>P NMR spectra.

3.1. ABr1178. Deamination of **1a** in Water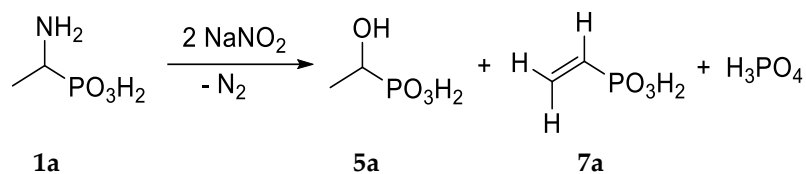

| 24 h             | $\alpha = 0.98$ | 85%        | 1%         | 9%       |
|------------------|-----------------|------------|------------|----------|
| 312 h            | $\alpha = 1.00$ | 84%        | 2%         | 10%      |
| $\delta_P$ [ppm] | 13.6 (dq)       | 21.33 (dq) | 12.9 (ddd) | 1.25 (s) |

After 24 h at 21 °C, post-reaction mixture contained 1-hydroxyethylphosphonic acid (**5a**) (85%molP), phosphoric acid (9%molP), vinylphosphonic acid (**7a**) (ca. 1%molP), unreacted substrate (**1a**) (2%molP) and 4 unidentified compounds (ca. 3%molP in total).

After 312 h at 21 °C, post-reaction mixture contained 1-hydroxyethylphosphonic acid (**5a**) (84%molP), orthophosphoric acid (10%molP), vinylphosphonic acid (**7a**) (ca. 2%molP) and 4 unidentified compounds (ca. 4%molP in total) (Figure S12 and Figure S14).

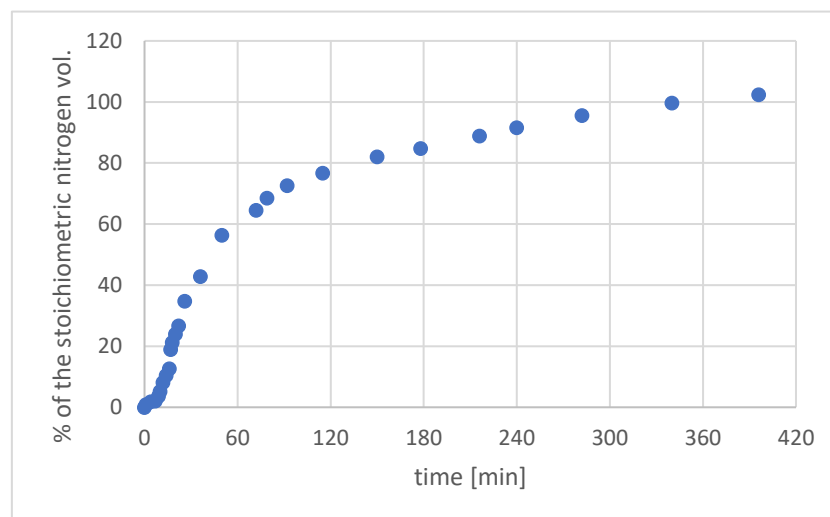

**Chart 1.** Dependence of the volume of the released gas (in % of the stoichiometric nitrogen volume) on the time in the reaction of 1-aminoethylphosphonic acid (**1a**) with NaNO<sub>2</sub> in water.

Vinylphosphonic acid (**7a**) and 1-hydroxyethylphosphonic acid (**5a**) identified by comparing chemical shifts, multiplicity and coupling constants on <sup>1</sup>H and <sup>31</sup>P NMR spectra with description in the literature (Table S3)

Additionally, 1-hydroxyethylphosphonic acid (**5a**) was identified on <sup>1</sup>H and <sup>31</sup>P NMR spectra by re-measuring the NMR spectra from the reaction mixture with the addition of 1-hydroxyethylphosphonic acid (**5a**) standard (Figure S13).

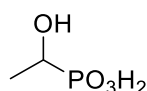

**1-Hydroxyethylphosphonic acid (5a).** <sup>31</sup>P NMR (D<sub>2</sub>O):  $\delta$  21.33 (dq,  $^2J_{\text{H-P}} = 5.6$  Hz,  $^3J_{\text{H-P}} = 15.4$  Hz); <sup>1</sup>H NMR (D<sub>2</sub>O):  $\delta$ : 3.70 (dq, 1H,  $^2J_{\text{H-P}} = 5.9$  Hz,  $^3J_{\text{H-H}} = 7.0$  Hz), 1.19 (dd, 3H,  $^3J_{\text{H-H}} = 7.0$  Hz,  $^3J_{\text{H-P}} = 15.9$  Hz).

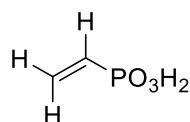

**Vinylphosphonic acid (7a).**  $^{31}\text{P}$  NMR ( $\text{D}_2\text{O}$ )  $\delta$ : 12.9 (ddd,  $^2J_{\text{H-P}} = 20.6$  Hz,  $^3J_{\text{H-P (cis)}} = 23.4$  Hz,  $^3J_{\text{H-P (trans)}} = 46.8$  Hz);  $^1\text{H}$  NMR ( $\text{D}_2\text{O}$ )  $\delta$ : 6.01 (ddd, 1H,  $^3J_{\text{H-H}} = 12.7$  Hz,  $^3J_{\text{H-H}} = 18.8$  Hz,  $^2J_{\text{H-P}} = 20.5$  Hz), 5.75 (ddd, 1H,  $^2J_{\text{H-H}} = 2.5$  Hz,  $^3J_{\text{H-H}} = 18.9$  Hz,  $^3J_{\text{H-P (cis)}} = 23.3$  Hz), 5.66 (ddd, 1H,  $^2J_{\text{H-H}} = 2.5$  Hz,  $^3J_{\text{H-H}} = 12.7$  Hz,  $^3J_{\text{H-P (trans)}} = 46.3$  Hz).

**Table S3.** Comparison of chemical shifts and coupling constants on  $^1\text{H}$  and  $^{31}\text{P}$  NMR spectra of the reaction products of 1-aminoethylphosphonic acid (**1a**) with  $\text{NaNO}_2$  in water with compounds described in the literature.

| Structure           | 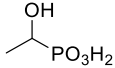 |  |                                                |                                                |
|---------------------|-----------------------------------------------------------------------------------|-------------------------------------------------------------------------------------|------------------------------------------------|------------------------------------------------|
| Source              | ABr1178                                                                           | Reference [8]                                                                       | ABr1178                                        | Reference [6]                                  |
| Solvent             | D2O                                                                               | D2O                                                                                 | D2O                                            | CDCl3                                          |
| <sup>31</sup> P NMR | 21.33 (dq, <i>J</i> = 5.6, 15.4 Hz)                                               | 19.6                                                                                | 12.9 (ddd, <i>J</i> = 20.6, 23.4, 46.8 Hz)     | 17.3 (ddd, <i>J</i> = 20.0, 20.5, 51.3 Hz)     |
| <sup>1</sup> H NMR  | 3.70 (dq, 1H, <i>J</i> = 5.9, 7.0 Hz)                                             | 3.53-3.58 (m, 1H)                                                                   | 6.01 (ddd, 1H, <i>J</i> = 12.7, 18.8, 20.5 Hz) | 6.31 (ddd, 1H, <i>J</i> = 20.5, 16.2, 4.5 Hz)  |
|                     | 1.19 (dd, 3H, <i>J</i> = 7.0, 15.9 Hz)                                            | 1.12 (dd, <i>J</i> = 7.2, 14.4 Hz, 3H)                                              | 5.75 (ddd, 1H, <i>J</i> = 2.5, 18.9, 23.3 Hz)  | 6.05 (ddd, 1H, <i>J</i> = 51.3, 11.2, 4.5 Hz)  |
|                     |                                                                                   |                                                                                     | 5.66 (ddd, 1H, <i>J</i> = 2.5, 12.7, 46.3 Hz)  | 6.02 (ddd, 1H, <i>J</i> = 20.0, 16.2, 11.2 Hz) |

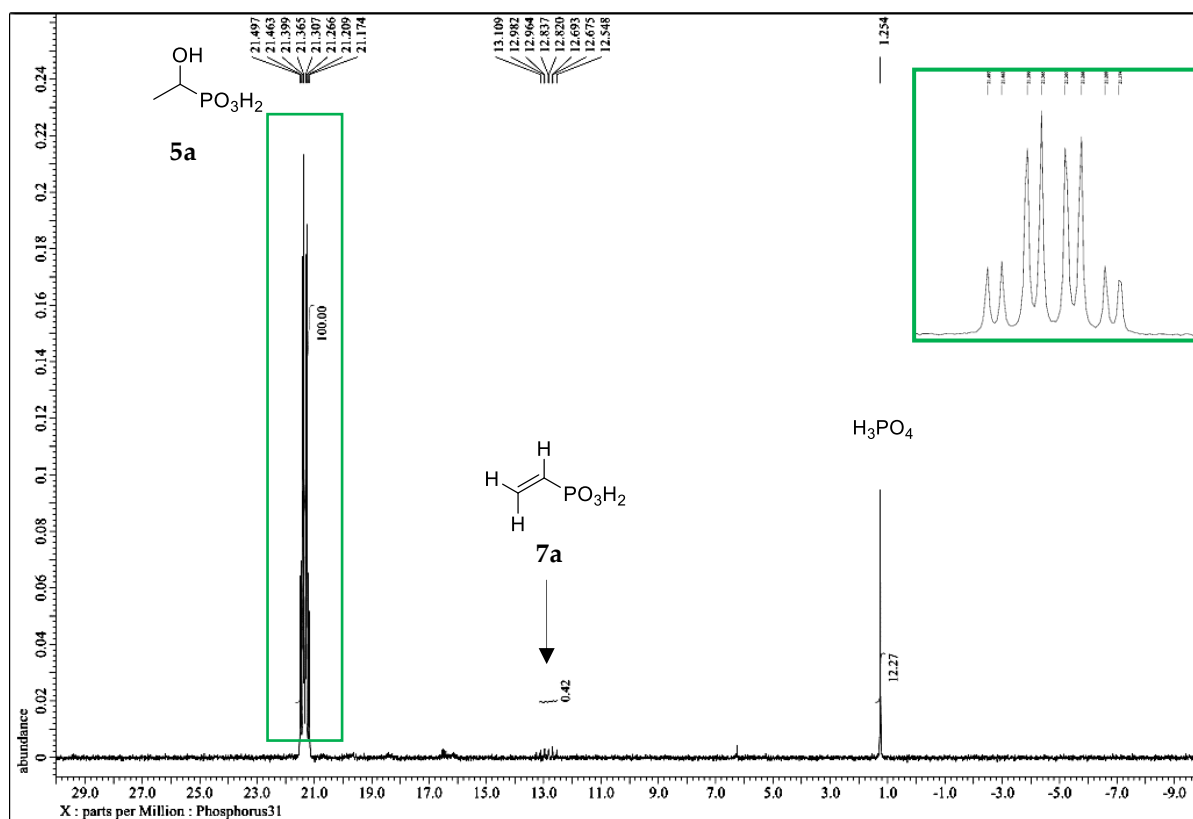

**Figure S12.**  $^{31}\text{P}$  NMR ( $\text{D}_2\text{O}$ , 162MHz) spectra of the crude post-reaction mixture of 1-aminoethylphosphonic acid (**1a**) with  $\text{NaNO}_2$  after 312 h.



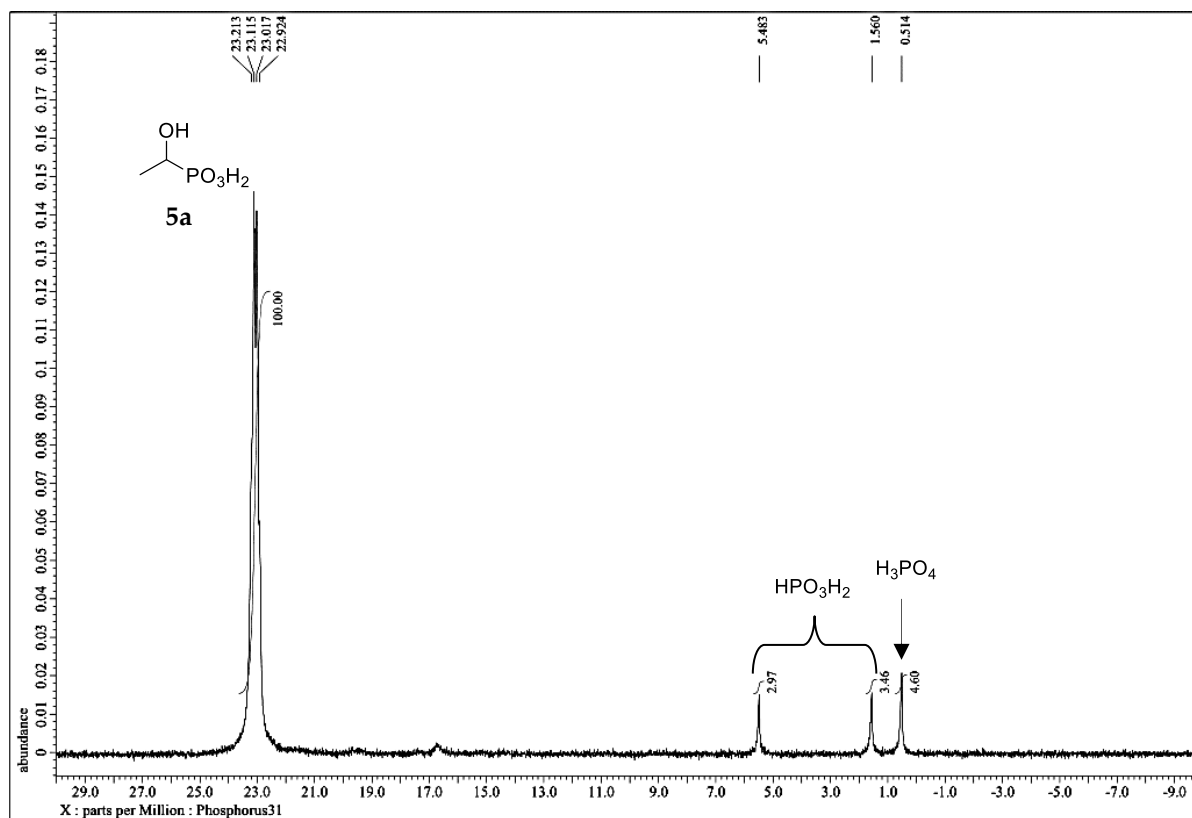

**Figure S13.**  $^{31}\text{P}$  NMR (D<sub>2</sub>O, 162 MHz) spectra of the crude post-reaction mixture of 1-aminoethylphosphonic acid (**1a**) with NaNO<sub>2</sub> after 312 h with addition of 1-hydroxyethylphosphonic acid (**5a**) as standard.

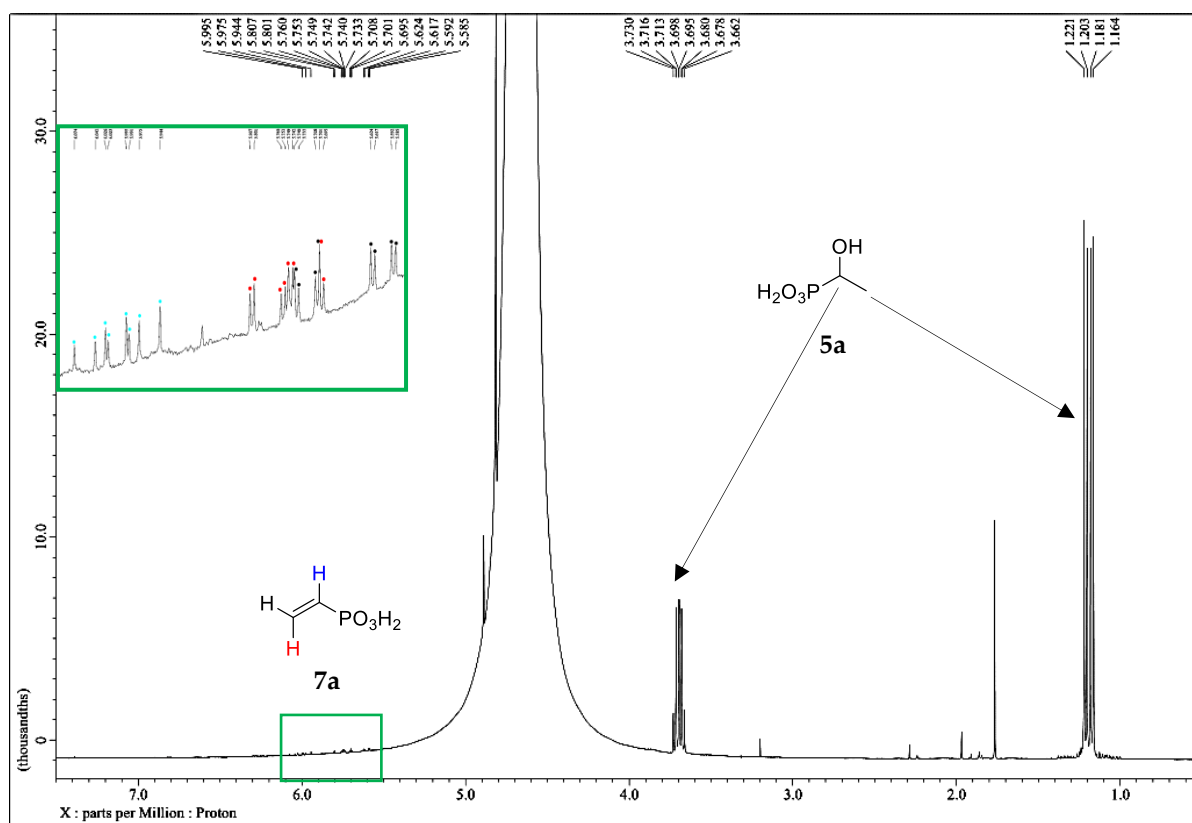

**Figure S14.**  $^1\text{H}$  NMR (D<sub>2</sub>O, 400 MHz) spectra of the crude post-reaction mixture of 1-aminoethylphosphonic acid (**1a**) with NaNO<sub>2</sub> after 312 h.

3.2. ABr1204. Deamination of **1m** in Water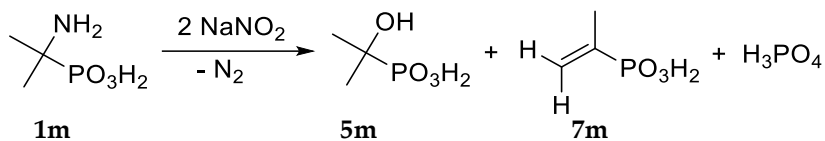

|                  |                 |                |             |          |
|------------------|-----------------|----------------|-------------|----------|
| 24 h             | $\alpha = 0.98$ | 84%            | 13%         | 1%       |
| 192 h            | $\alpha = 1.00$ | 86%            | 12%         | 2%       |
| $\delta_P$ [ppm] | 16.83 (septet)  | 23.84 (septet) | 15.31 (ddq) | 1.15 (s) |

After 24 h in 21 °C, post-reaction mixture contained 1-hydroxy-1-methylethylphosphonic acid (**5m**) (84%molP), 1-methylvinylphosphonic acid (**7m**) (13%molP), orthophosphoric acid (1%molP) and unreacted substrate **1m** (2%molP).

After 192 h in 21 °C, post-reaction mixture contained 1-hydroxy-1-methylethylphosphonic acid (**5m**) (86%molP), 1-methylvinylphosphonic acid (**7m**) (12%molP) and orthophosphoric acid (2%molP) (Figure S15 and Figure S17).

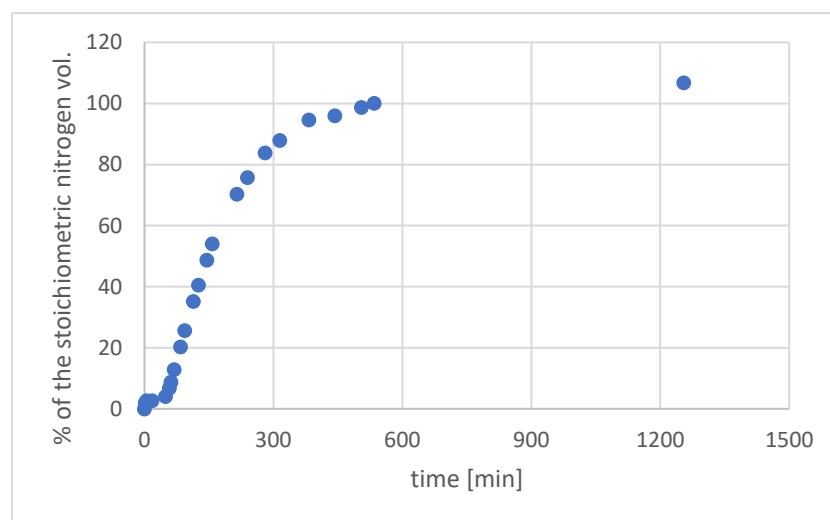

**Chart 2.** Dependence of the volume of the released gas (in % of the stoichiometric nitrogen volume) on the time in the reaction of 1-amino-1-methylethylphosphonic acid (**1m**) with NaNO<sub>2</sub> in water.

The presence of 1-hydroxy-1-methylethylphosphonic acid (**5m**) was confirmed by re-measuring NMR spectra with addition of reference material—1-hydroxy-1-methylethylphosphonic acid (**5m**) (Figure S16 and Figure S18).

1-Methylvinylphosphonic acid (**7m**) was identified by comparing chemical shifts, multiplicity and coupling constants on <sup>1</sup>H and <sup>31</sup>P NMR spectra with description in the literature (Table S1).

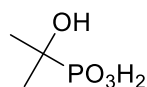

**1-Hydroxy-1-methylethylphosphonic acid (5m).** <sup>31</sup>P NMR (D<sub>2</sub>O):  $\delta$  23.84 (septet, <sup>3</sup>J<sub>H-P</sub> = 14.0 Hz); <sup>1</sup>H NMR (D<sub>2</sub>O)  $\delta$ : 1.23 (d, 6H, <sup>3</sup>J<sub>H-P</sub> = 13.8 Hz).

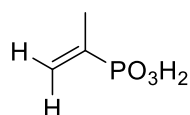

**1-Methylvinylphosphonic acid (7m).**  $^{31}\text{P}$  NMR ( $\text{D}_2\text{O}$ ):  $\delta$  15.21 (ddq,  $^3J_{\text{H-P (trans)}} = 43.9\text{ Hz}$ ,  $^3J_{\text{H-P (cis)}} = 20.6$ ,  $^3J_{\text{H-P}} = 13.1\text{ Hz}$ );  $^1\text{H}$  NMR ( $\text{D}_2\text{O}$ )  $\delta$ : 5.46 (ddq, 1H,  $^3J_{\text{H-P (cis)}} = 20.3\text{ Hz}$ ,  $^2J_{\text{H-H}} = 2.1\text{ Hz}$ ,  $^4J_{\text{H-H}} = 1.2\text{ Hz}$ ), 5.36 (ddq, 1H,  $^3J_{\text{H-P (trans)}} = 43.4\text{ Hz}$ ,  $^2J_{\text{H-H}} = 1.8\text{ Hz}$ ,  $^4J_{\text{H-H}} = 1.8\text{ Hz}$ ), 1.77 (dt, 3H,  $^3J_{\text{H-P}} = 13.1\text{ Hz}$ ,  $^4J_{\text{H-H}} = 1.2\text{ Hz}$ ).

**Table S4.** Comparison of chemical shifts and coupling constants on  $^1\text{H}$  and  $^{31}\text{P}$  NMR spectra of 1-methylvinylphosphonic acid (7m) description in the literature.

| Structure           | 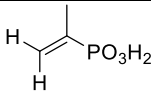 |                      |
|---------------------|-------------------------------------------------------------------------------------|----------------------|
| Source              | ABr1204                                                                             | Reference [10]       |
| Solvent             | $\text{D}_2\text{O}$                                                                | $\text{D}_2\text{O}$ |
| $^{31}\text{P}$ NMR | 15.21 (ddq, $J = 43.9, 20.6, 13.1\text{ Hz}$ )                                      | 18.34                |
| $^1\text{H}$ NMR    | 5.46 (ddq, 1H, $J = 20.3, 2.1, 1.2\text{ Hz}$ )                                     | 5.32–5.47 (q, 2H)    |
|                     | 5.36 (tq, 1H, $J = 43.4, 1.8\text{ Hz}$ )                                           |                      |
|                     | 1.77 (dt, 3H, $J = 13.1, 1.2\text{ Hz}$ )                                           | 1.55/1.58 (d, 3H)    |

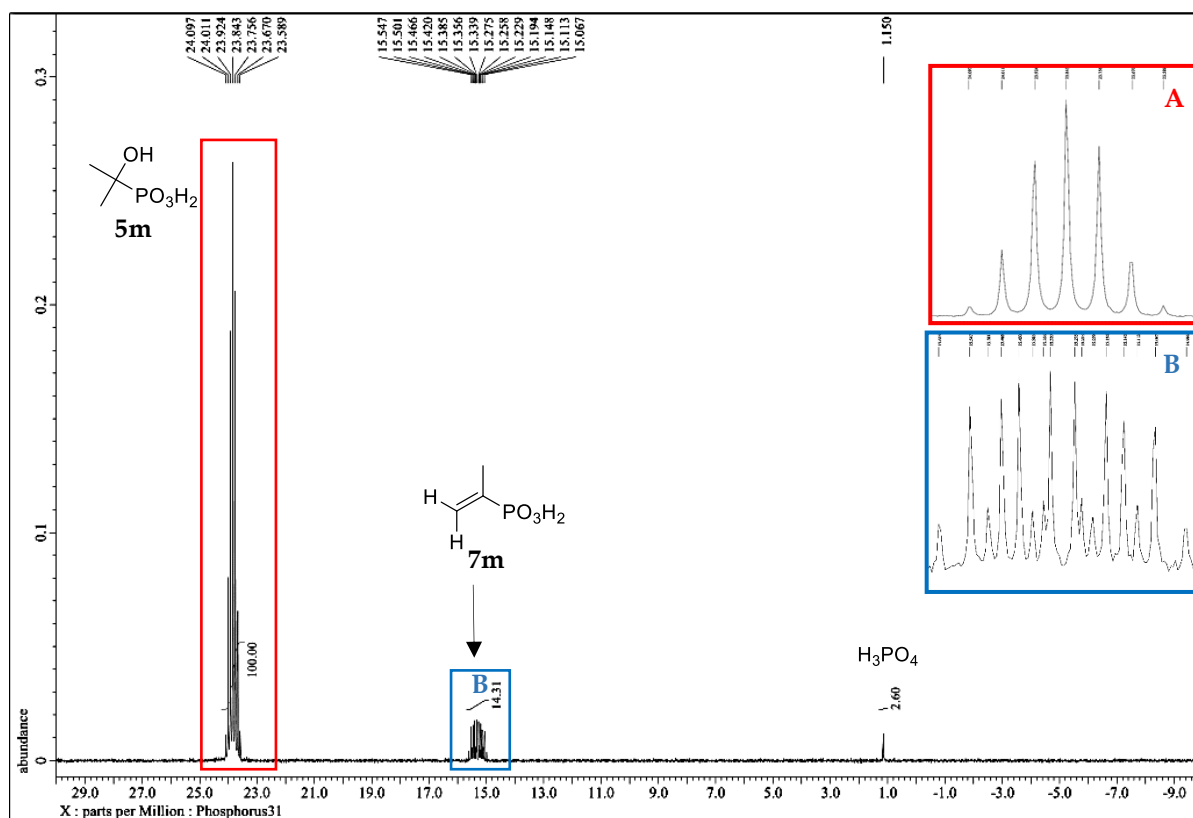

Figure S15.  $^{31}\text{P}$  NMR (D<sub>2</sub>O, 162 MHz) spectra of the crude post-reaction mixture of 1-amino-1-methylethylphosphonic acid (**1m**) with NaNO<sub>2</sub> after 192 h.

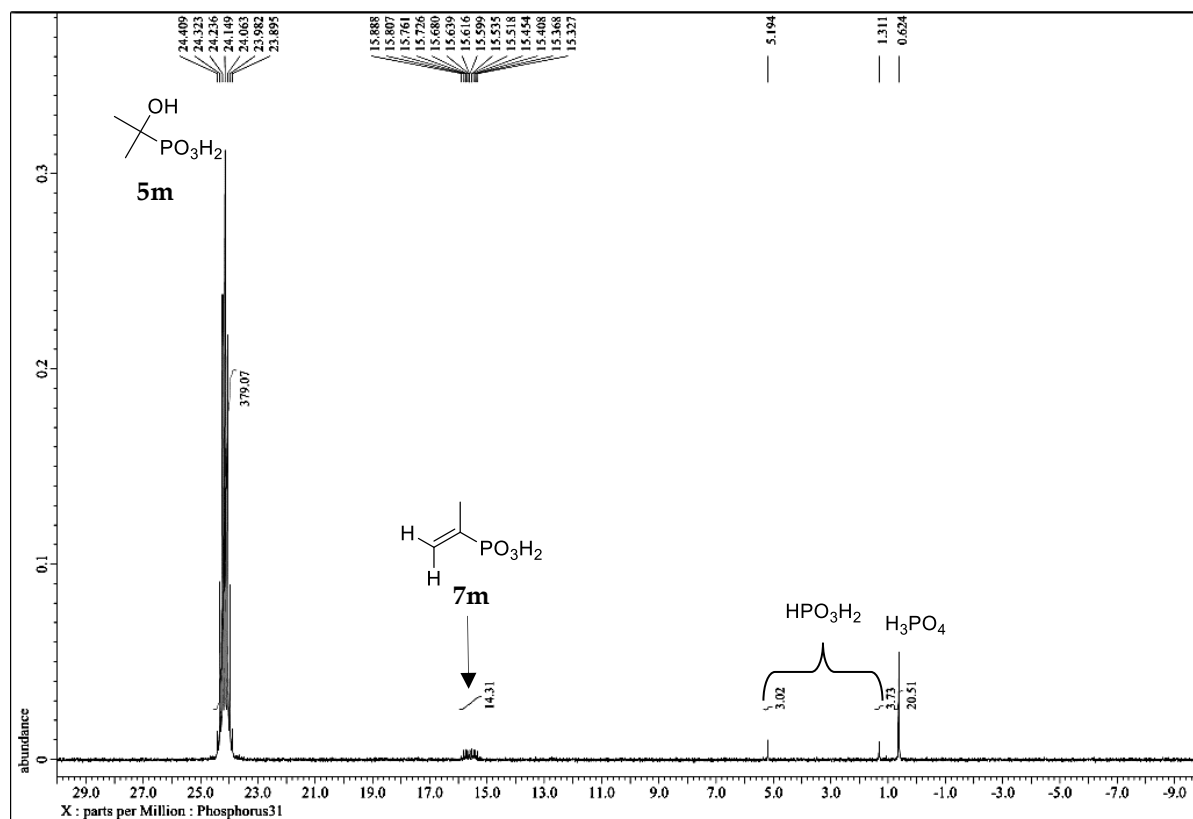

Figure S16.  $^{31}\text{P}$  NMR (D<sub>2</sub>O, 162 MHz) spectra of the crude post-reaction mixture of 1-amino-1-methylethylphosphonic acid (**1m**) with NaNO<sub>2</sub> after 192 h with addition of 1-hydroxy-1-methylethylphosphonic acid (**5m**) as reference.

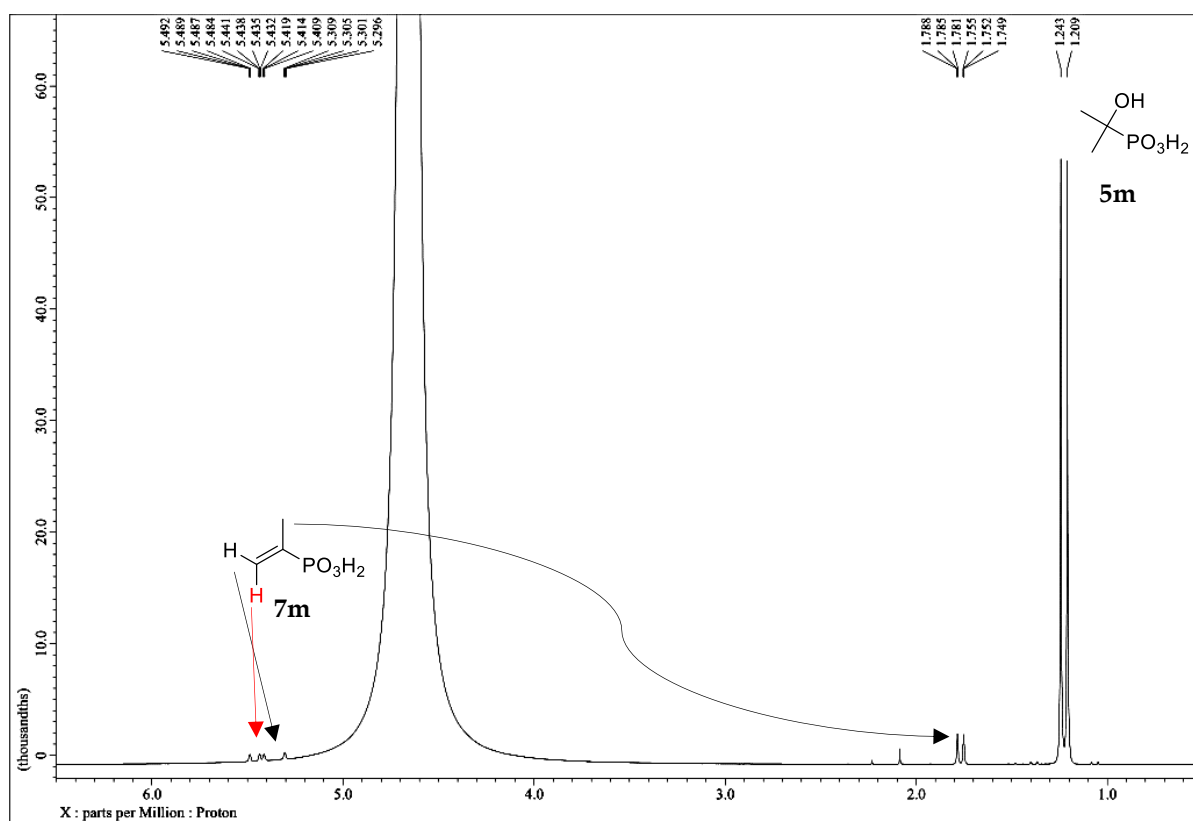

**Figure S17.**  $^1\text{H}$  NMR ( $\text{D}_2\text{O}$ , 400MHz) spectra of the crude post-reaction mixture of 1-amino-1-methylethylphosphonic acid (**1m**) with  $\text{NaNO}_2$  after 192 h.

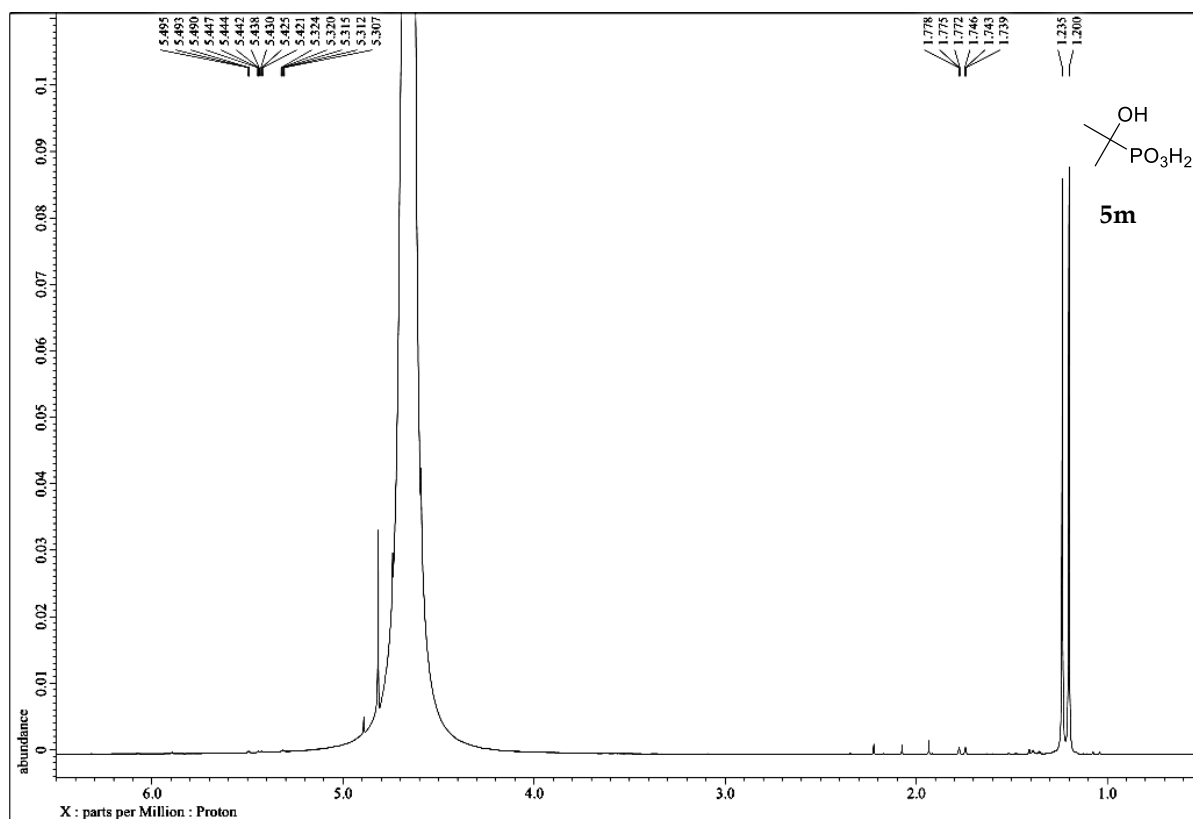

**Figure S18.**  $^1\text{H}$  NMR ( $\text{D}_2\text{O}$ , 400MHz) spectra of the crude post-reaction mixture of 1-amino-1-methylethylphosphonic acid (**1m**) with  $\text{NaNO}_2$  after 192 h with addition of 1-hydroxy-1-methylethylphosphonic acid (**5m**) as reference.

3.3. ABr1206. Deamination of **1o** in Water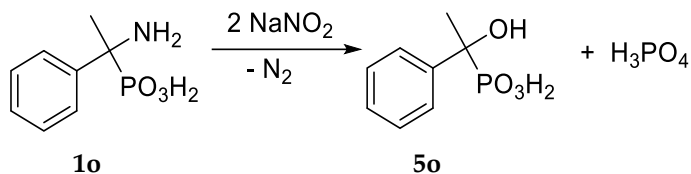

|                  |                 |           |          |
|------------------|-----------------|-----------|----------|
| 48h              | $\alpha = 1.00$ | 98%       | 2%       |
| $\delta_P$ [ppm] |                 | 20.28 (q) | 0.88 (s) |

After 48h at 21 °C, post-reaction mixture contained 1-hydroxy-1-phenylethylphosphonic acid (**5o**) (98%molP) and orthophosphoric acid (2%molP) (Figure S19 and Figure S21).

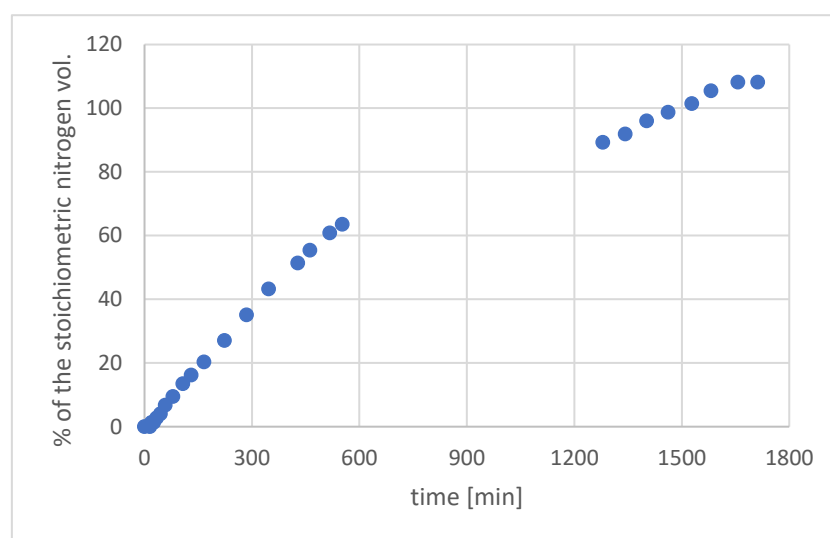

**Chart 3.** Dependence of the volume of the released gas (in % of the stoichiometric nitrogen volume) on the time in the reaction of 1-amino-1-phenylethylphosphonic acid (**1o**) with NaNO<sub>2</sub> in water.

The presence of 1-hydroxy-1-phenylethylphosphonic acid (**5o**) was confirmed by re-measuring NMR spectra (Figure S20 and Figure S22) with addition of 1-hydroxy-1-phenylethylphosphonic acid (**5o**) as reference material.

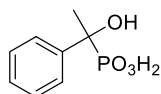

**1-Hydroxy-1-phenylethylphosphonic acid (5o).** <sup>31</sup>P NMR (D<sub>2</sub>O):  $\delta$  20.28 (q,  $^3J_{\text{H-P}} = 14.0$  Hz); <sup>1</sup>H NMR (D<sub>2</sub>O)  $\delta$ : 7.43–7.48 (m, 2H), 7.26–7.32 (m, 2H), 7.18–7.24 (m, 1H), 1.63 (d, 6H,  $^3J_{\text{H-P}} = 13.8$  Hz).

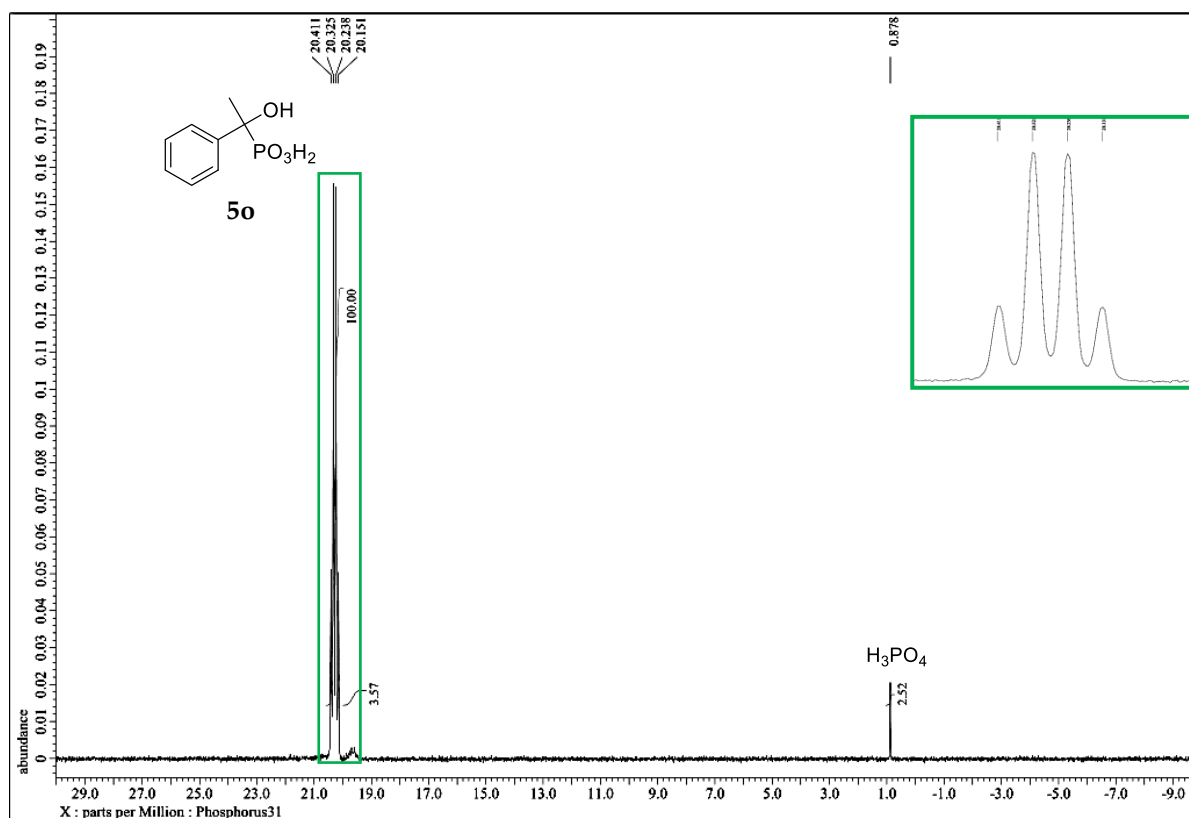

**Figure S19.**  $^{31}\text{P}$  NMR (D<sub>2</sub>O, 162MHz) spectra of the crude post-reaction mixture of 1-amino-1-phenylethylphosphonic acid (**1o**) with NaNO<sub>2</sub> after 48h.

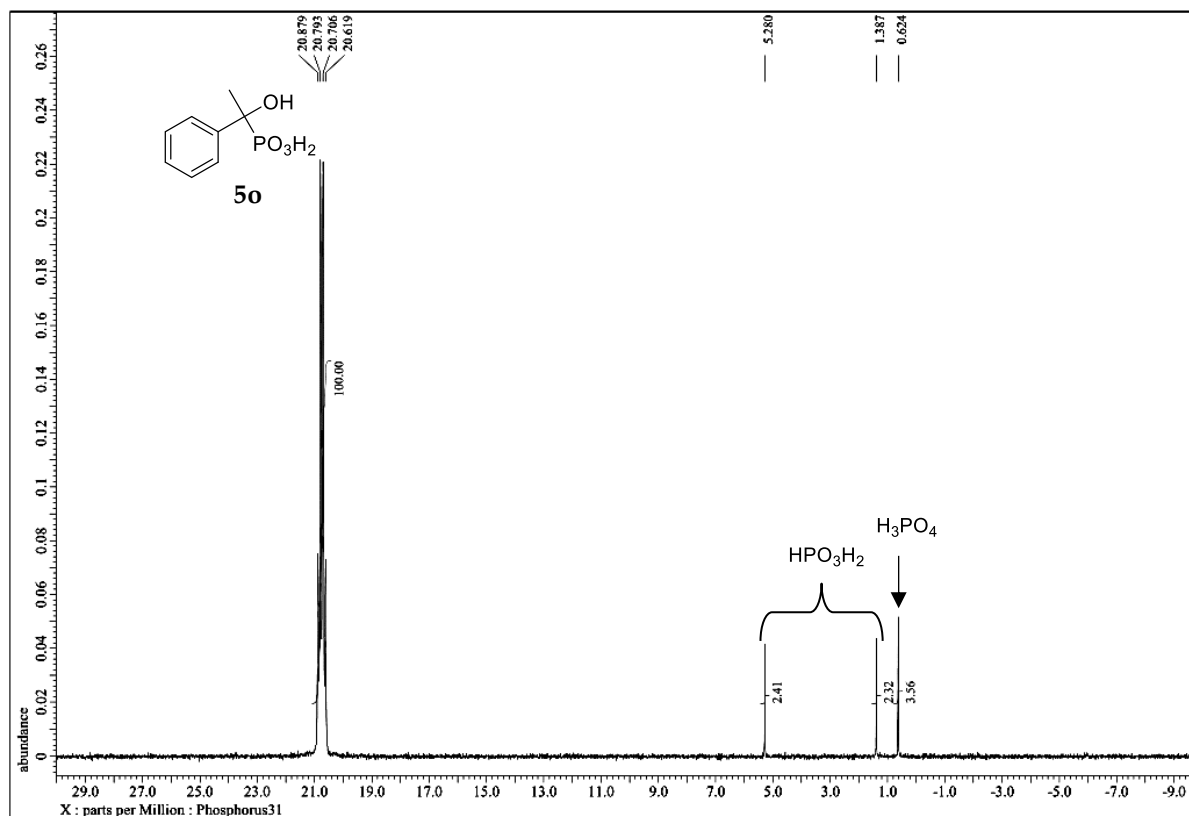

**Figure S20.**  $^{31}\text{P}$  NMR (D<sub>2</sub>O, 162MHz) spectra of the crude post-reaction mixture of 1-amino-1-phenylethylphosphonic acid (**1o**) with NaNO<sub>2</sub> after 48h with addition of 1-hydroxy-1-phenylethylphosphonic acid (**5o**) as reference material.

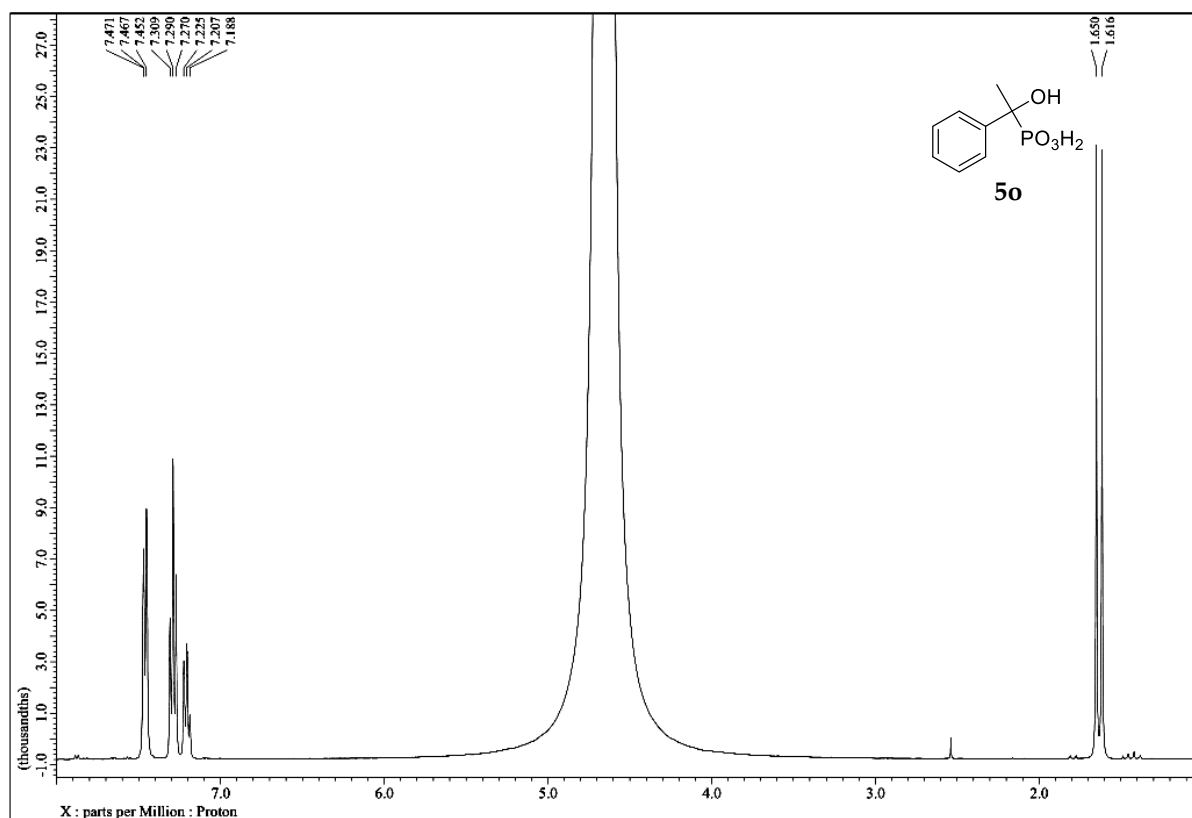

**Figure S21.**  $^1\text{H}$  NMR ( $\text{D}_2\text{O}$ , 400MHz) spectra of the crude post-reaction mixture of 1-amino-1-phenylethylphosphonic acid (**1o**) with  $\text{NaNO}_2$  after 48h.

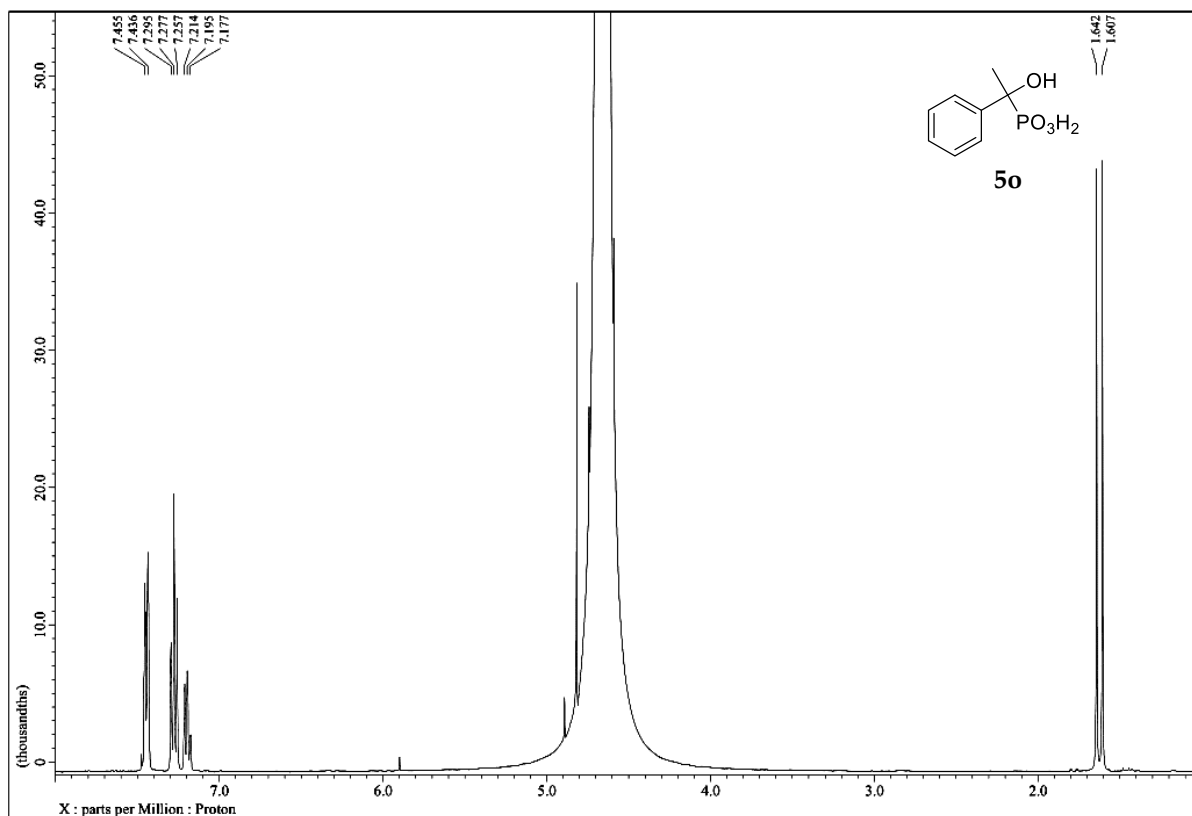

**Figure S22.**  $^1\text{H}$  NMR ( $\text{D}_2\text{O}$ , 400MHz) spectra of the crude post-reaction mixture of 1-amino-1-phenylethylphosphonic acid (**1o**) with  $\text{NaNO}_2$  after 48h with addition of 1-hydroxy-1-phenylethylphosphonic acid (**5o**) as reference material.



3.4. ABr1208. Deamination of **1b** in Water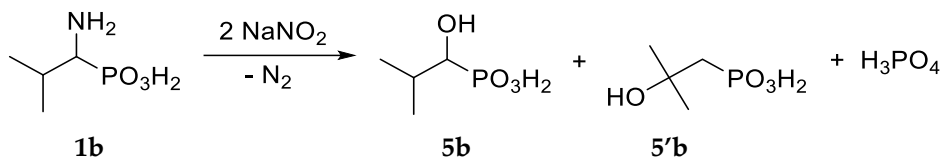

|                  |                 |            |           |          |
|------------------|-----------------|------------|-----------|----------|
| 24 h             | $\alpha = 1.00$ | 34%        | 5%        | 59%      |
| 192 h            | $\alpha = 1.00$ | 33%        | 5%        | 58%      |
| $\delta_P$ [ppm] |                 | 20.57 (dd) | 21.24 (t) | 0.84 (s) |

After 24 h at 21 °C, post-reaction mixture contained orthophosphoric acid (59%molP), 1-hydroxy-2-methylpropylphosphonic acid (**5b**) (34%molP), 2-hydroxy-2-methylpropylphosphonic acid (**5'b**) (5%molP) and unidentified compound (2%molP).

After 192 h, post-reaction mixture contained orthophosphoric acid (58%molP), 1-hydroxy-2-methylpropylphosphonic acid (**5b**) (33%molP), 2-hydroxy-2-methylpropylphosphonic acid (**5'b**) (5%molP) and 3 unidentified compounds (2%molP, 1%molP, >1%molP) (Figure S23 and Figure S25).

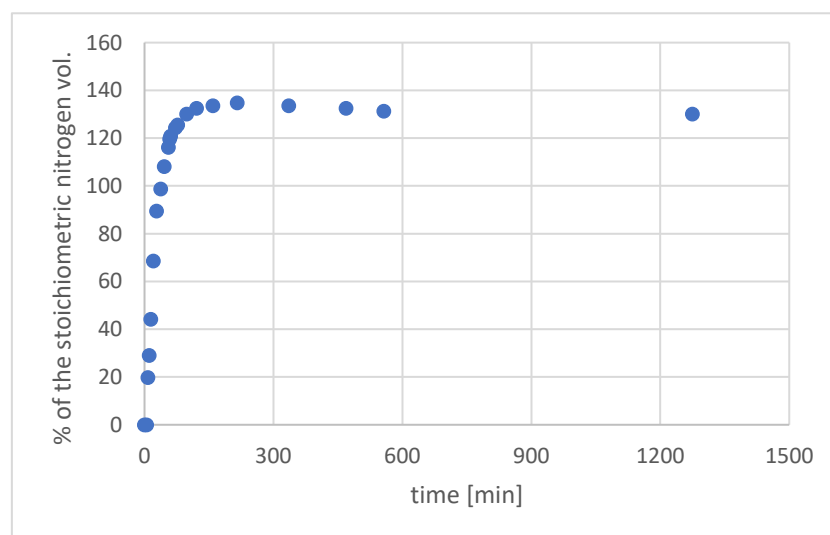

**Chart 4.** Dependence of the volume of the released gas (in % of the stoichiometric nitrogen volume) on the time in the reaction of 1-amino-2-methylpropylphosphonic acid (**1b**) with NaNO<sub>2</sub> in water.

The presence of 1-hydroxy-2-methylpropylphosphonic acid (**5b**) was confirmed by re-measuring NMR spectra (Figure S24 and Figure S26) with addition of 1-hydroxy-2-methylpropylphosphonic acid (**5b**) as reference material.

2-Hydroxy-2-methylpropylphosphonic acid (**5'b**) has been not described in the chemical literature, therefore it was identified by analysis of the signals multiplicity on the <sup>1</sup>H and <sup>31</sup>P NMR spectra and by comparing spectra with spectra of similar 2-hydroxypropylphosphonic acid (Table S5).

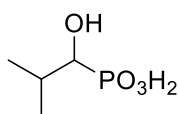

**1-Hydroxy-2-methylpropylphosphonic acid (5b).** <sup>31</sup>P NMR (D<sub>2</sub>O):  $\delta$  20.57 (dd,  $^2J_{\text{H-P}} = 8.4$  Hz,  $^3J_{\text{H-P}} = 7.5$  Hz); <sup>1</sup>H NMR (D<sub>2</sub>O)  $\delta$ : 3.56 (dd, 1H,  $^2J_{\text{H-P}} = 8.6$  Hz,  $^3J_{\text{H-H}} = 5.5$  Hz), 1.87 (doublet of doublets of septets,  $^3J_{\text{H-H}} = 5.5$  Hz,  $^3J_{\text{H-P}} = 6.8$  Hz,  $^3J_{\text{H-H}} = 5.5$  Hz), 0.90 (d, 3H,  $^3J_{\text{H-H}} = 7.0$  Hz), 0.87 (d, 3H,  $^3J_{\text{H-H}} = 7.0$  Hz)

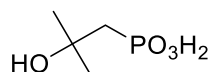

**2-Hydroxy-2-methylpropylphosphonic acid (5'b).**  $^{31}\text{P}$  NMR ( $\text{D}_2\text{O}$ ):  $\delta$  21.24 (t,  $^2J_{\text{H-P}} = 17.8$  Hz);  $^1\text{H}$  NMR ( $\text{D}_2\text{O}$ )  $\delta$ : 1.83 (d, 3H,  $^2J_{\text{H-P}} = 17.7$  Hz), 1.22 (s, 6H).

**Table S5.** Comparison of chemical shifts and coupling constants on  $^1\text{H}$  and  $^{31}\text{P}$  NMR spectra of 2-hydroxy-2-methylpropylphosphonic acid (**5'b**) with spectra of 2-hydroxypropylphosphonic acid described in the literature.

| Structure           |                             |                                          |
|---------------------|-----------------------------|------------------------------------------|
| Source              | ABr1208                     | Reference [9]                            |
| Solvent             | $\text{D}_2\text{O}$        | $\text{D}_2\text{O}$                     |
| $^{31}\text{P}$ NMR | 21.24 (t, $J = 17.8$ Hz)    | 19.9                                     |
| $^1\text{H}$ NMR    |                             | 3.80 (1H, dm, $J = 6.5$ Hz)              |
|                     | 1.83 (d, 3H, $J = 17.7$ Hz) | 1.39 (2H, ddd, $J = 18.0, 6.6, 15.3$ Hz) |
|                     | 1.22 (s, 6H)                | 0.97 (3H, d, $J = 6.5$ Hz)               |

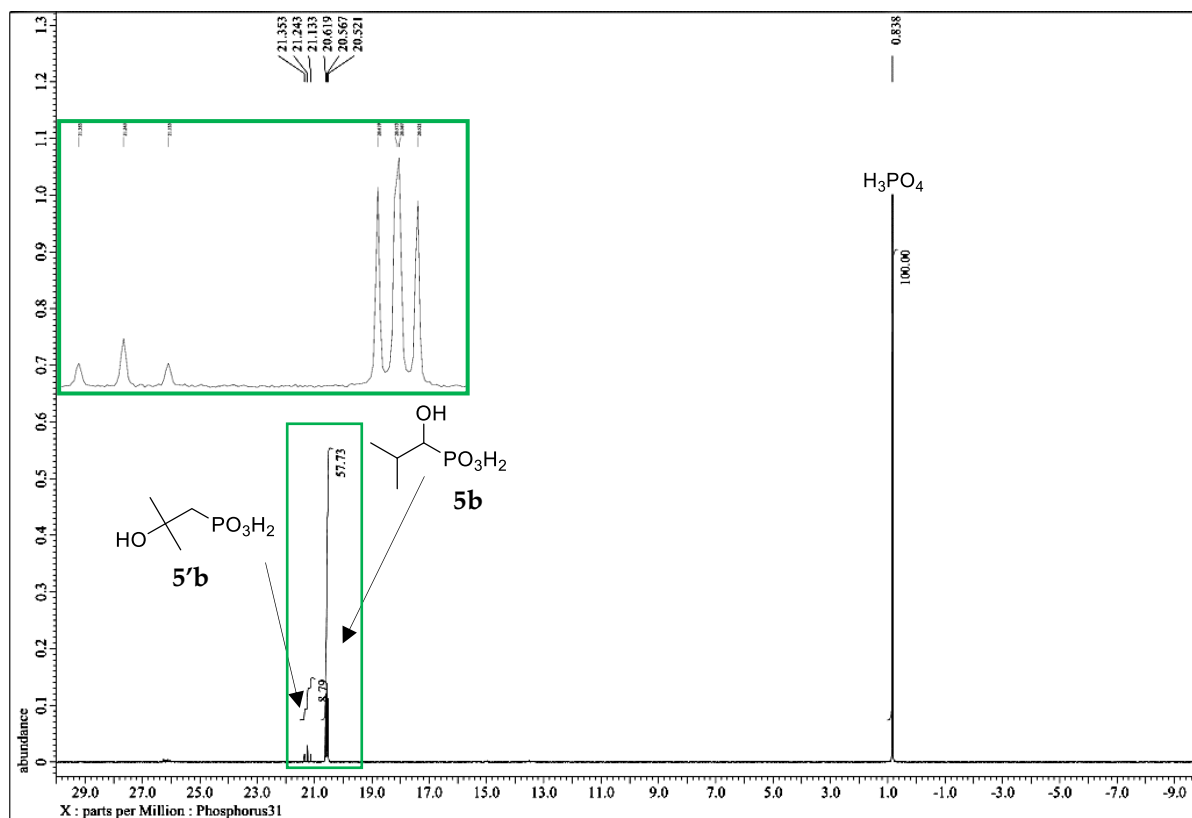

**Figure S23.**  $^{31}\text{P}$  NMR (D<sub>2</sub>O, 162 MHz) spectra of the crude post-reaction mixture of 1-amino-2-methylpropylphosphonic acid (**1b**) with NaNO<sub>2</sub> after 192 h.

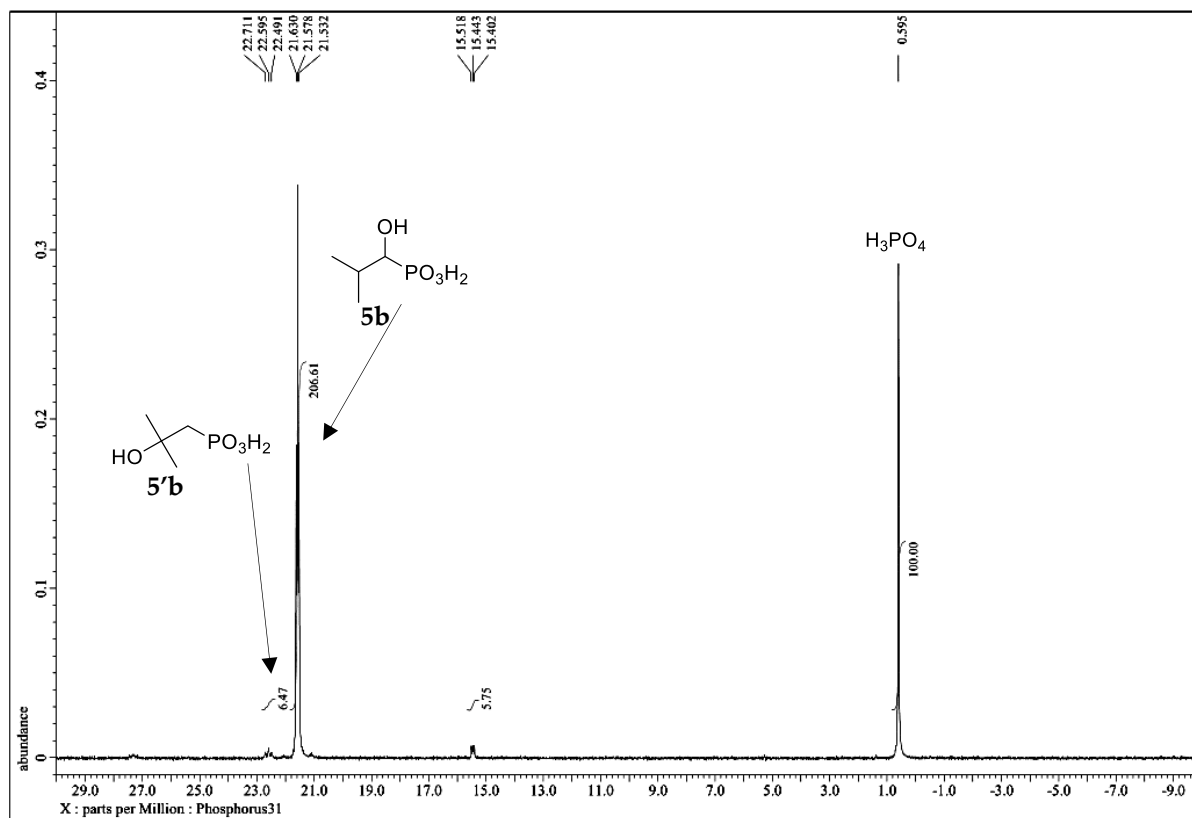

**Figure S24.**  $^{31}\text{P}$  NMR (D<sub>2</sub>O, 162 MHz) spectra of the crude post-reaction mixture of 1-amino-2-methylpropylphosphonic acid (**1b**) with NaNO<sub>2</sub> after 192 h with addition of 1-hydroxy-2-methylpropylphosphonic acid (**5b**) as reference material.

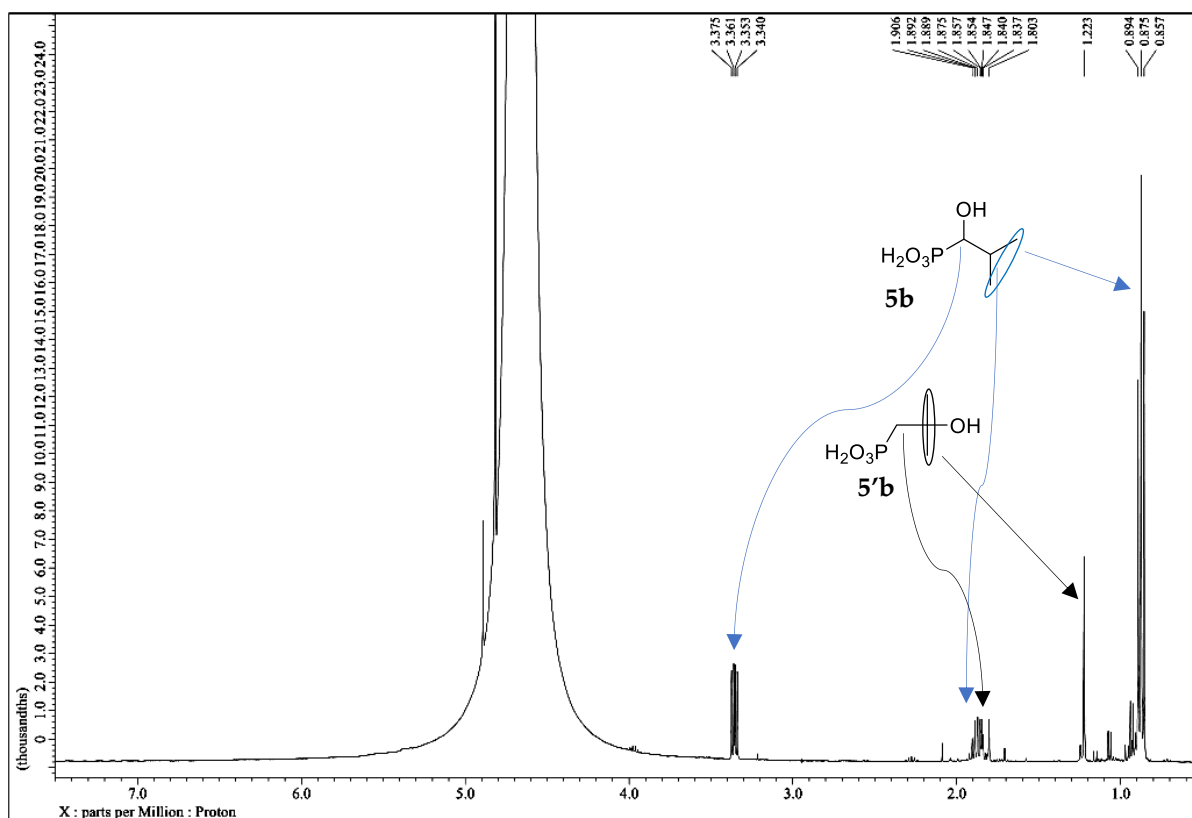

**Figure S25.**  $^1\text{H}$  NMR ( $\text{D}_2\text{O}$ , 400MHz) spectra of the crude post-reaction mixture of 1-amino-2-methylpropylphosphonic acid (**1b**) with  $\text{NaNO}_2$  after 192 h.

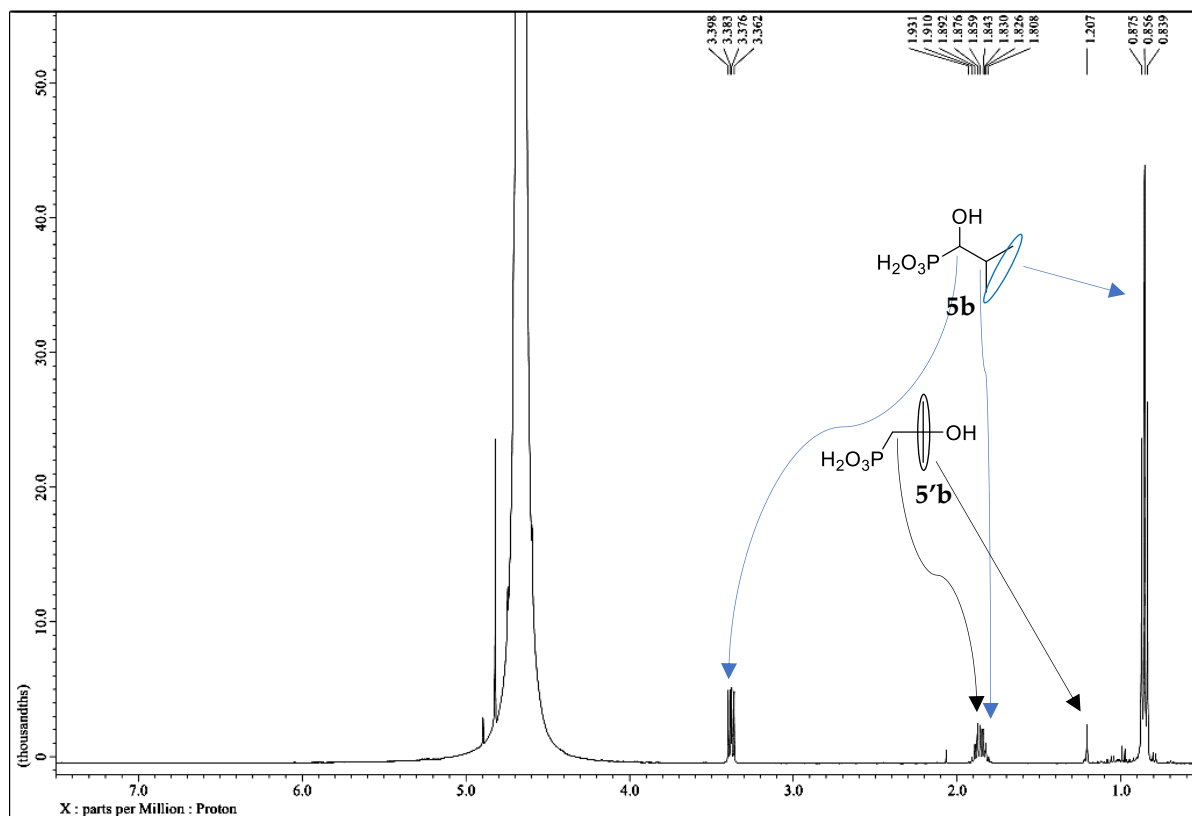

**Figure S26.**  $^1\text{H}$  NMR ( $\text{D}_2\text{O}$ , 400MHz) spectra of the crude post-reaction mixture of 1-amino-2-methylpropylphosphonic acid (**1b**) with  $\text{NaNO}_2$  after 192 h with addition of 1-hydroxy-2-methylpropylphosphonic acid (**5b**) as reference material.

3.5. ABr1210. Deamination of **1d** in Water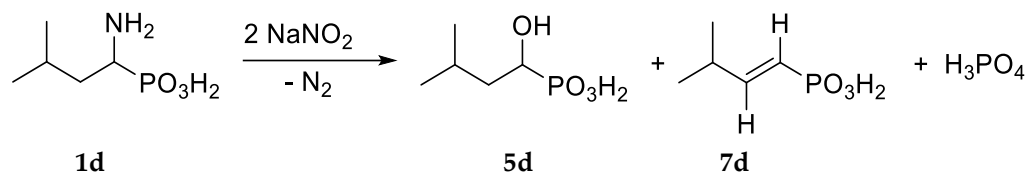

|                  |                 |            |             |          |
|------------------|-----------------|------------|-------------|----------|
| 24 h             | $\alpha = 1.00$ | 61%        | 6%          | 24%      |
| 168 h            | $\alpha = 1.00$ | 61%        | 7%          | 27%      |
| $\delta_P$ [ppm] |                 | 21.58 (dd) | 14.90 (ddd) | 1.16 (s) |

After 24 h at 21 °C, post-reaction mixture contained 1-hydroxy-3-methylbutylphosphonic acid (**5d**) (61%molP), (*E*)-3-but-1-en-1-ylphosphonic acid (**7d**) (6%molP), orthophosphoric acid (24%molP) and 5 unidentified compounds (9%molP in total).

After 168h post-reaction mixture contained 1-hydroxy-3-methylbutylphosphonic acid (**5d**) (61%molP), (*E*)-3-but-1-en-1-ylphosphonic acid (**7d**) (7%molP), orthophosphoric acid (27%molP) and 4 unidentified compounds (5%molP in total) (Figure S27 and Figure S28).

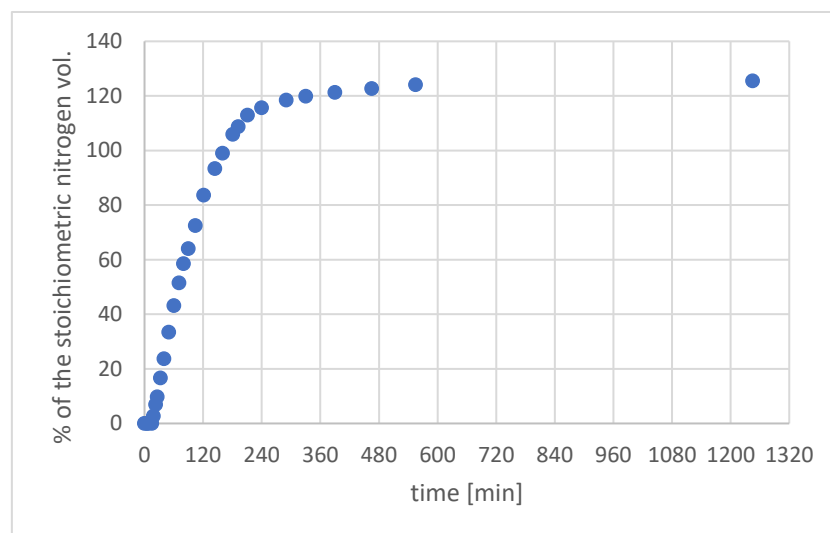

**Chart 5.** Dependence of the volume of the released gas (in % of the stoichiometric nitrogen volume) on the time in the reaction of 1-amino-3-methylbutylphosphonic acid (**1d**) with NaNO<sub>2</sub> in water.

1-Hydroxy-3-methylbutylphosphonic acid (**5d**) was identified by comparing chemical shifts, multiplicity and coupling constants on <sup>1</sup>H and <sup>31</sup>P NMR spectra with description in the literature (Table S6). NMR spectra of (*E*)-3-but-1-en-1-ylphosphonic acid (**7d**) were not described in the literature, therefore this compound was identified by comparing signals multiplicity on the <sup>1</sup>H and <sup>31</sup>P NMR spectra with spectra of structurally similar (*E*)-prop-1-en-1-ylphosphonic acid (Table S6).

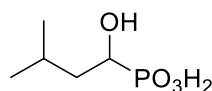

**1-Hydroxy-3-methylbutylphosphonic acid (5d).**  $^{31}\text{P}$  NMR ( $\text{D}_2\text{O}$ ):  $\delta$  21.61 (dt,  $^2J_{\text{H-P}} = 7.5$  Hz,  $^3J_{\text{H-P}} = 4.7$  Hz);  $^1\text{H}$  NMR ( $\text{D}_2\text{O}$ ):  $\delta$ : 3.64 (ddd, 1H,  $^3J_{\text{H-H}} = 11.3$  Hz,  $^2J_{\text{H-P}} = 7.8$  Hz,  $^3J_{\text{H-H}} = 2.8$  Hz), 1.60–1.72 (m, 1H,  $J$  undetermined), 1.47 (dddd, 1H,  $^2J_{\text{H-H}} = 14.5$  Hz,  $^3J_{\text{H-H}} = 11.3$  Hz,  $J_{\text{H-H}} = 8.0$  Hz,  $^3J_{\text{H-P}} = 4.0$  Hz), 1.32 (dddd, 1H,  $^2J_{\text{H-H}} = 14.6$  Hz,  $^3J_{\text{H-H}} = 10.1$  Hz,  $^3J_{\text{H-P}} = 4.9$  Hz,  $^3J_{\text{H-H}} = 2.8$  Hz), 0.81 (d, 3H,  $^3J_{\text{H-H}} = 6.4$  Hz), 0.77 (d, 3H,  $^3J_{\text{H-H}} = 6.7$  Hz).

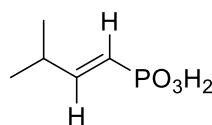

**(E)-3-But-1-en-1-ylphosphonic acid (7d).**  $^{31}\text{P}$  NMR ( $\text{D}_2\text{O}$ ):  $\delta$  14.90 (ddd,  $^3J_{\text{H-P}} = 21.5$  Hz,  $^2J_{\text{H-P}} = 18.7$  Hz,  $^4J_{\text{H-P}} = 1.9$  Hz);  $^1\text{H}$  NMR ( $\text{D}_2\text{O}$ ):  $\delta$ : 6.30 (ddd, 1H,  $^3J_{\text{H-P}} = 21.1$  Hz,  $^3J_{\text{H-H}} = 17.1$  Hz,  $^3J_{\text{H-H}} = 6.1$  Hz), 5.56 (ddd, 1H,  $^2J_{\text{H-P}} = 19.6$  Hz,  $^3J_{\text{H-H}} = 17.1$  Hz,  $^4J_{\text{H-H}} = 1.5$  Hz), 1.74–1.88 (m, 1H,  $J$  undetermined), 0.87 (d, 6H,  $^3J_{\text{H-H}} = 6.7$  Hz).

**Table S6.** Comparison of chemical shifts and coupling constants on  $^1\text{H}$  and  $^{31}\text{P}$  NMR spectra of the reaction products of 1-amino-3-methylbutylphosphonic acid (**1d**) with  $\text{NaNO}_2$  with spectra of compounds described in the literature.

| Structure           | 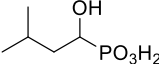 |  |  |                                       |
|---------------------|-------------------------------------------------------------------------------------|--------------------------------------------------------------------------------------|---------------------------------------------------------------------------------------|---------------------------------------|
| Source              | ABr1210                                                                             | Reference [11]                                                                       | ABr1210                                                                               | Reference [12]                        |
| Solvent             | D <sub>2</sub> O                                                                    | D <sub>2</sub> O                                                                     | D <sub>2</sub> O                                                                      | D <sub>2</sub> O                      |
| <sup>31</sup> P NMR | 21.61 (dt, <i>J</i> = 7.5, <i>J</i> = 4.7 Hz)                                       | 25.5                                                                                 | 14.90 (ddd, <i>J</i> = 21.5, 18.7, 1.9 Hz)                                            | 13.31                                 |
| <sup>1</sup> H NMR  | 3.64 (ddd, 1H, <i>J</i> = 11.3, 7.8, 2.8 Hz)                                        | 3.82 (m, 1H)                                                                         | 6.30 (ddd, 1H, <i>J</i> = 21.1, 17.1, 6.1 Hz)                                         | 6.46 – 6.35 (m, 1H)                   |
|                     | 1.60-1.72 (m, 1H, <i>J</i> undetermined)                                            | 1.73 (m, 1H)                                                                         | 5.56 (ddd, 1H, <i>J</i> = 19.6, 17.1, 1.5 Hz)                                         | 5.78 – 5.69 (m, 1H)                   |
|                     | 1.47 (dddd, 1H, <i>J</i> = 14.5, 11.3, 8.0, 4.0 Hz)                                 | 1.55 (m, 1H)                                                                         | 1.74-1.88 (m, 1H, <i>J</i> undetermined)                                              | 1.79 (dt, 3H, <i>J</i> = 6.5, 2.0 Hz) |
|                     | 1.32 (dddd, 1H, <i>J</i> = 14.6, 10.1, 4.9, 2.8 Hz)                                 | 1.40 (m, 1H)                                                                         | 0.87 (d, 6H, <i>J</i> = 6.7 Hz)                                                       |                                       |
|                     | 0.81 (d, 3H, <i>J</i> = 6.4 Hz)                                                     | 0.89 (d, 3H, <i>J</i> = 6.6 Hz)                                                      |                                                                                       |                                       |
|                     | 0.77 (d, 3H, <i>J</i> = 6.7 Hz)                                                     | 0.85 (d, 3H, <i>J</i> = 6.6 Hz)                                                      |                                                                                       |                                       |
|                     |                                                                                     |                                                                                      |                                                                                       |                                       |

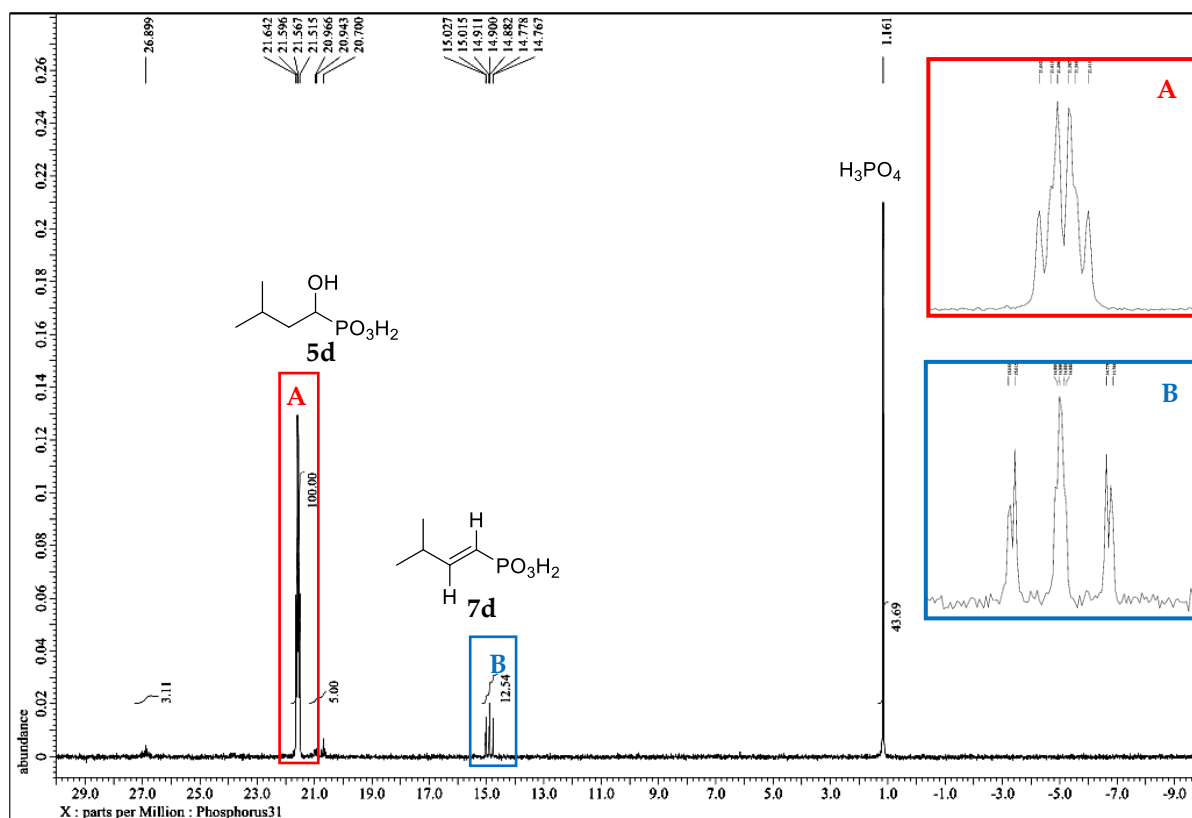

Figure S27.  $^{31}\text{P}$  NMR ( $\text{D}_2\text{O}$ , 162MHz) spectra of the crude post-reaction mixture of 1-amino-3-methylbutylphosphonic acid (**1d**) with  $\text{NaNO}_2$  after 168h.

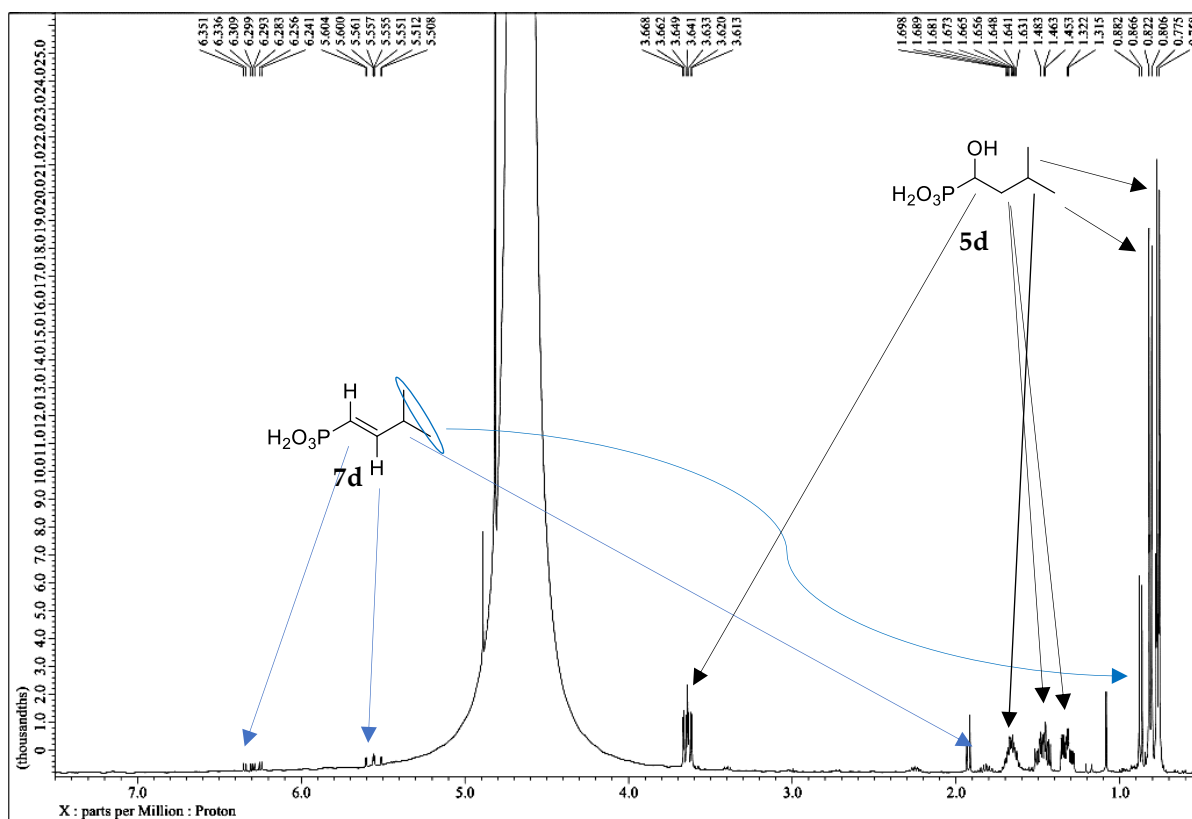

Figure S28.  $^1\text{H}$  NMR ( $\text{D}_2\text{O}$ , 400MHz) spectra of the crude post-reaction mixture of 1-amino-3-methylbutylphosphonic acid (**1d**) with  $\text{NaNO}_2$  after 168h.

3.6. ABr1212. Deamination of **1c** in Water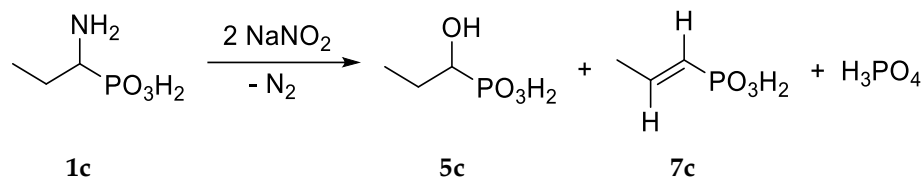

|                  |                 |            |             |          |
|------------------|-----------------|------------|-------------|----------|
| 24 h             | $\alpha = 1.00$ | 64%        | 7%          | 26%      |
| 168h             | $\alpha = 1.00$ | 63%        | 7%          | 28%      |
| $\delta_P$ [ppm] |                 | 20.96 (dt) | 13.84 (ddq) | 1.06 (s) |

After 24 h at 21 °C, post-reaction mixture contained 1-hydroxypropylphosphonic acid (**5c**) (64%molP), (*E*)-prop-1-en-1-ylphosphonic acid (**7c**) (7%molP), orthophosphoric acid (26%molP) and 3 unidentified compounds (3%molP in total).

After 168h post-reaction contained 1-hydroxypropylphosphonic acid (**5c**) (63%molP), (*E*)-prop-1-en-1-ylphosphonic acid (**7c**) (7%molP), orthophosphoric acid (28%molP) and 2 unidentified compounds (3%molP in total) (Figure S29 and Figure S30).

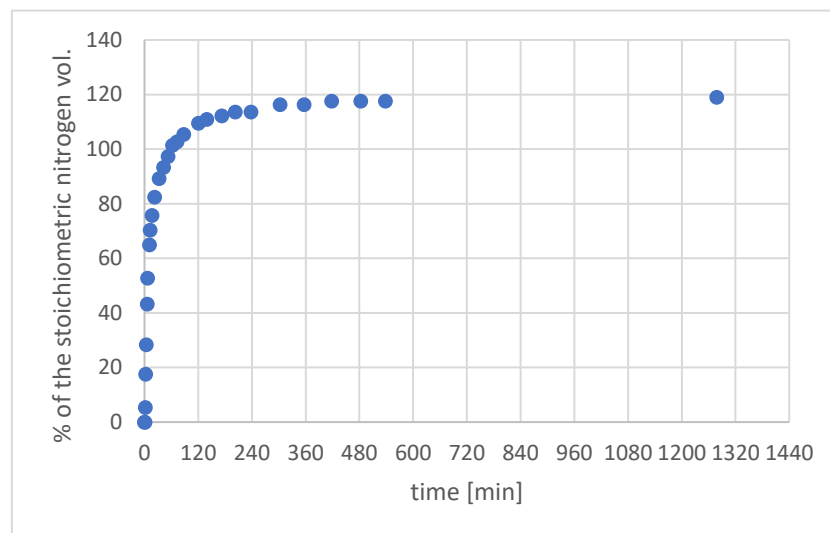

**Chart 6.** Dependence of the volume of the released gas (in % of the stoichiometric nitrogen volume) on the time in the reaction of 1-aminopropylphosphonic acid (**1c**) with NaNO<sub>2</sub> in water.

1-Hydroxypropylphosphonic acid (**5c**) and (*E*)-3-prop-1-en-1-ylphosphonic acid (**7c**) were identified by comparing chemical shifts, multiplicity and coupling constants on <sup>1</sup>H and <sup>31</sup>P NMR spectra with description in the literature (Table S7).

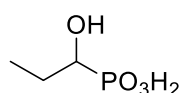

**1-Hydroxypropylphosphonic acid (5c).** <sup>31</sup>P NMR (D<sub>2</sub>O):  $\delta$  21.61 (dt, <sup>2</sup>J<sub>H-P</sub> = 7.5 Hz, <sup>3</sup>J<sub>H-P</sub> = 4.7 Hz); <sup>1</sup>H NMR (D<sub>2</sub>O):  $\delta$ : 3.44 (ddd, 1H, <sup>3</sup>J<sub>H-H</sub> = 10.2 Hz, <sup>2</sup>J<sub>H-P</sub> = 6.7 Hz, <sup>3</sup>J<sub>H-H</sub> = 3.4 Hz), 1.60–1.73 (m, 1H, *J* undetermined), 1.44 (dddq, 1H, *J* = 14.0 Hz, *J* = 10.2 Hz, *J* = 9.0 Hz, *J* = 7.0 Hz), 0.88 (t, 3H, *J*<sub>H-H</sub> = 7.3 Hz).



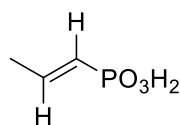

**(E)-Prop-1-en-1-ylphosphonic acid (7c).**  $^{31}\text{P}$  NMR ( $\text{D}_2\text{O}$ ):  $\delta$  13.84 (ddq,  $^2J_{\text{H-P}} = 20.6$  Hz,  $^3J_{\text{H-P}} = 20.3$  Hz,  $^4J_{\text{H-H}} = 1.9$  Hz);  $^1\text{H}$  NMR ( $\text{D}_2\text{O}$ ):  $\delta$ : 6.29 (ddq, 1H,  $^3J_{\text{H-P}} = 20.3$  Hz,  $^3J_{\text{H-H}} = 17.0$  Hz,  $^3J_{\text{H-H}} = 6.5$  Hz), 5.63 (ddq, 1H,  $^2J_{\text{H-P}} = 20.6$  Hz,  $^3J_{\text{H-H}} = 17.0$  Hz,  $^3J_{\text{H-H}} = 1.5$  Hz), 1.60–1.73 (m, 3H,  $J$  undetermined).

**Table S7.** Comparison of chemical shifts and coupling constants on  $^1\text{H}$  and  $^{31}\text{P}$  NMR spectra of the reaction products of 1-aminopropylphosphonic acid (**1c**) with  $\text{NaNO}_2$  with compounds described in the literature. .

| Structure           | 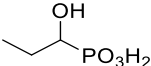 |  |                                               |                                               |
|---------------------|-----------------------------------------------------------------------------------|-------------------------------------------------------------------------------------|-----------------------------------------------|-----------------------------------------------|
| Source              | ABr1212                                                                           | Reference [13]                                                                      | ABr1212                                       | Reference [12]                                |
| Solvent             | D <sub>2</sub> O                                                                  | D <sub>2</sub> O                                                                    | D <sub>2</sub> O                              | D <sub>2</sub> O                              |
| <sup>31</sup> P NMR | 21.61 (dt, <i>J</i> = 7.5, 4.7 Hz)                                                | 23.9                                                                                | 13.84 (ddq, <i>J</i> = 20.6, 20.3, 1.9 Hz)    | 13.31                                         |
|                     | 3.44 (ddd, 1H, <i>J</i> = 10.2, 6.7, 3.4 Hz)                                      | 2.85 - 3.45 (1H, m)                                                                 | 6.29 (ddq, 1H, <i>J</i> = 20.3, 17.0, 6.5 Hz) | 6.46 – 6.35 (m, 1H)                           |
| <sup>1</sup> H NMR  | 1.60-1.73 (m, 1H, <i>J</i> undetermined)                                          | 1.45 - 2.25 (2H, m)                                                                 | 5.63 (ddq, 1H, <i>J</i> = 20.6, 17.0, 1.5 Hz) | 5.78 – 5.69 (m, 1H)                           |
|                     | 1.44 (dddq, 1H, <i>J</i> = 14.0, 10.2, 9.02, 7.0 Hz)                              |                                                                                     | 1.60-1.73 (m, 3H)                             | 1.79 (dt, <u>3H</u> , <i>J</i> = 6.5, 2.0 Hz) |
|                     | 0.88 (t, 3H, <i>J</i> = 7.3 Hz)                                                   | 1.20 (t, 3H, <i>J</i> = 6.2 Hz)                                                     |                                               |                                               |

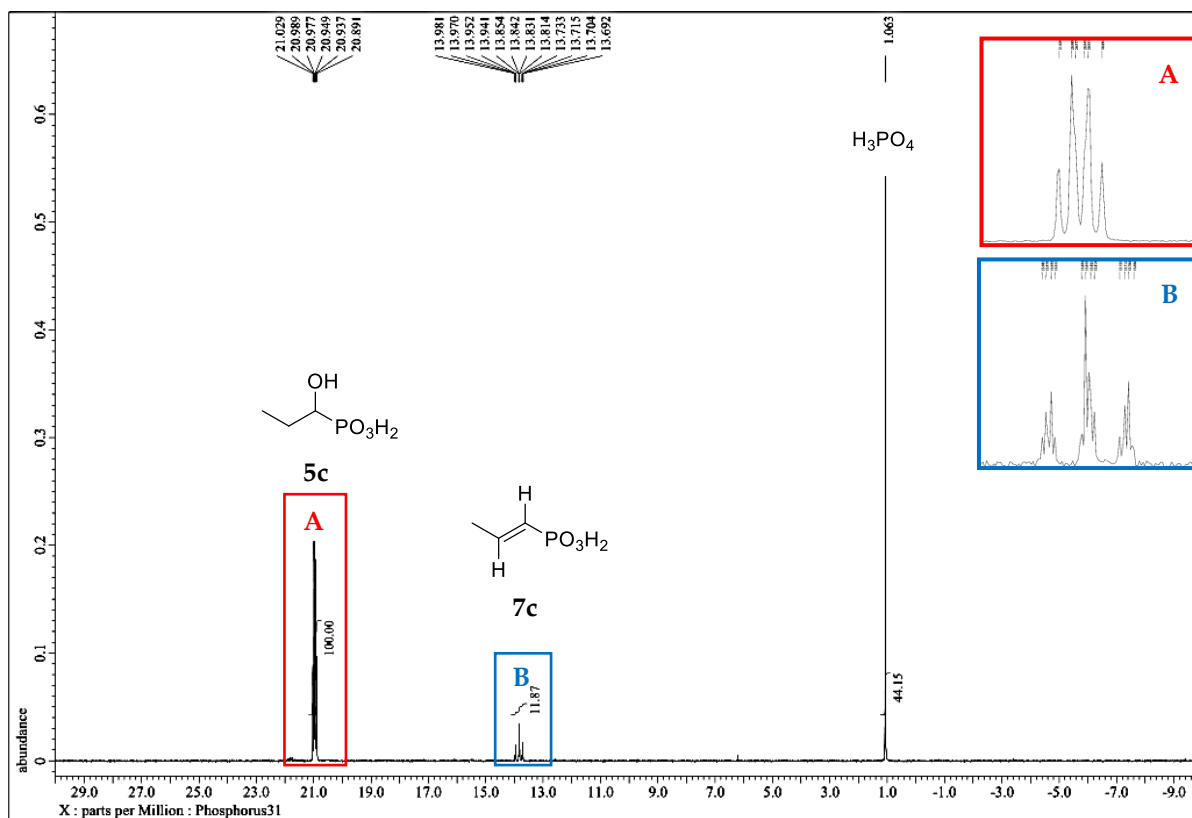

Figure S29.  $^{31}\text{P}$  NMR (D<sub>2</sub>O, 162MHz) spectra of the crude post-reaction mixture of 1-aminopropylphosphonic acid (1c) with NaNO<sub>2</sub> after 168h.

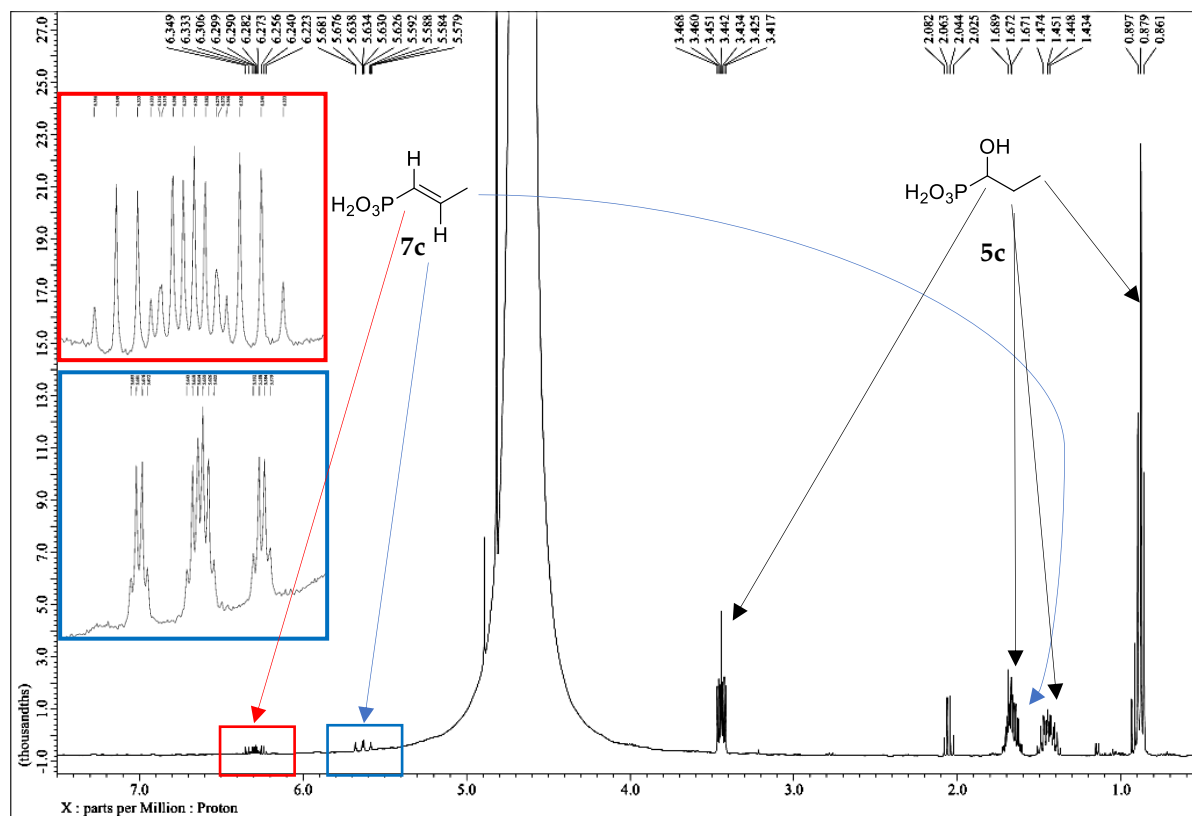

Figure S30.  $^1\text{H}$  NMR (D<sub>2</sub>O, 400MHz) spectra of the crude post-reaction mixture of 1-aminopropylphosphonic acid (1c) with NaNO<sub>2</sub> after 168h.

3.7. ABr1214. Deamination of **1i** in Water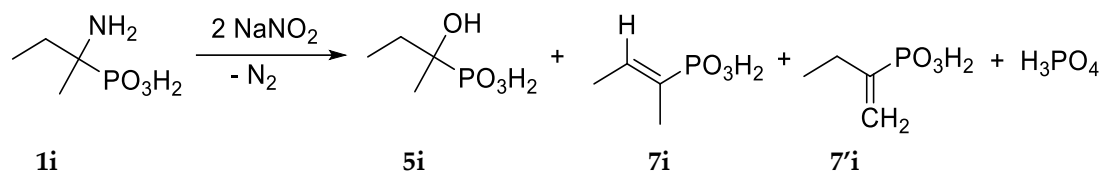

|                  |                 |             |             |             |      |
|------------------|-----------------|-------------|-------------|-------------|------|
| 48h              | $\alpha = 0.97$ | 43%         | 41%         | 5%          | 6%   |
| 192 h            | $\alpha = 1.00$ | 43%         | 42%         | 8%          | 7%   |
| $\delta_P$ [ppm] | 16.82           | 24.18 (ddq) | 17.47 (dqg) | 15.63 (ddt) | 1.05 |

After 24 h at 21 °C, post-reaction mixture contained 1-hydroxy-1-methylpropylphosphonic acid (**5i**) (43%molP), (*E*)-1-methylprop-1-en-1-ylphosphonic acid (**7i**) (41%molP), 1-ethylvinylphosphonic acid (**7'i**) (5%molP), orthophosphoric acid (6%molP), unreacted substrate (3%molP) and 2 unidentified compounds (2%molP in total).

After 192 h post-reaction mixture contained 1-hydroxy-1-methylpropylphosphonic acid (**5i**) (43%molP), (*E*)-1-methylprop-1-en-1-ylphosphonic acid (**7i**) (42%molP), 1-ethylvinylphosphonic acid (**7'i**) (8%molP), orthophosphoric acid (7%molP) and trace amounts of 2 unidentified compounds (Figure S31 and Figure S32).

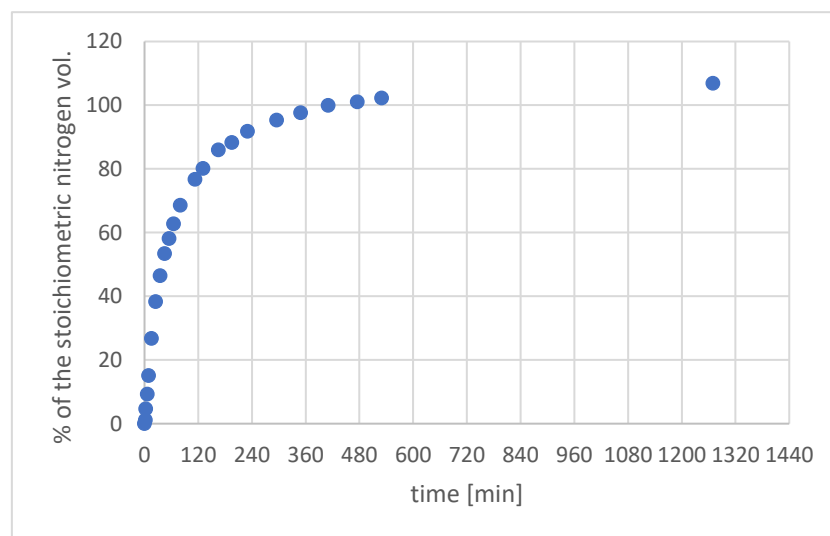

**Chart 7.** Dependence of the volume of the released gas (in % of the stoichiometric nitrogen volume) on the time in the reaction of 1-amino-1-methylpropylphosphonic acid (**1i**) with NaNO<sub>2</sub> in water.

(*E*)-1-Methylprop-1-en-1-ylphosphonic acid (**7i**) was identified by comparing chemical shifts, multiplicity and coupling constants on <sup>1</sup>H and <sup>31</sup>P NMR spectra with description in the literature of structurally similar (*E*)-2-(*N*-hydroxylamino)-1-methylpent-1-en-1-ylphosphonic acid (Table S8).

Spectra of 1-hydroxy-1-methylpropylphosphonic acid (**5i**) and 1-ethylvinylphosphonic acid (**7'i**) have been not described in the literature. Therefore these compounds were identified by comparing chemical shifts, multiplicity and coupling constants on <sup>1</sup>H and <sup>31</sup>P NMR spectra with description in the literature with spectra of structurally similar 1-hydroxy-1-methylethylphosphonic acid (**5m**) and 1-methylvinylphosphonic acid (**7m**) (experiment ABr1204) (Table S9).

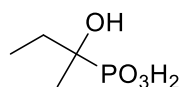

**1-Hydroxy-1-methylpropylphosphonic acid (5i).**  $^{31}\text{P}$  NMR ( $\text{D}_2\text{O}$ ):  $\delta$  24.18 (ddq,  $^3J_{\text{H-P}} = 14.5$  Hz,  $^3J_{\text{H-P}} = 11.1$  Hz,  $^3J_{\text{H-P}} = 7.0$  Hz);  $^1\text{H}$  NMR ( $\text{D}_2\text{O}$ ):  $\delta$ : 1.49–1.70 (m, 2H,  $J$  undetermined), 1.17 (d, 3H,  $^3J_{\text{H-P}} = 14.4$  Hz), 0.81 (t, 3H,  $^3J_{\text{H-H}} = 7.3$  Hz).

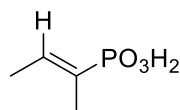

**(E)-1-Methylprop-1-en-1-ylphosphonic acid (7i).**  $^{31}\text{P}$  NMR ( $\text{D}_2\text{O}$ ):  $\delta$  17.47 (dq,  $^3J_{\text{H-P(cis)}} = 21.7$  Hz,  $^3J_{\text{H-P}} = 13.6$  Hz,  $^4J_{\text{H-P}} = 3.7$  Hz);  $^1\text{H}$  NMR ( $\text{D}_2\text{O}$ ):  $\delta$ : 6.15 (ddq, 1H,  $^3J_{\text{H-P}} = 21.7$  Hz,  $^3J_{\text{H-H}} = 6.7$  Hz,  $^4J_{\text{H-H}} = 1.5$  Hz), 1.63 (ddq, 3H,  $^3J_{\text{H-P}} = 13.6$  Hz,  $^4J_{\text{H-H}} = 1.2$  Hz,  $^5J_{\text{H-H}} = 1.2$  Hz), 1.57 (ddq, 3H,  $^3J_{\text{H-H}} = 6.7$  Hz,  $^4J_{\text{H-P}} = 3.7$  Hz,  $^5J_{\text{H-H}} = 1.2$  Hz).

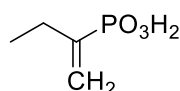

**1-Ethylvinylphosphonic acid (7'i).**  $^{31}\text{P}$  NMR ( $\text{D}_2\text{O}$ ):  $\delta$  15.63 (ddt,  $^3J_{\text{H-P(trans)}} = 44.4$  Hz,  $^3J_{\text{H-P(cis)}} = 21.5$  Hz,  $^3J_{\text{H-P}} = 10.3$  Hz);  $^1\text{H}$  NMR ( $\text{D}_2\text{O}$ ):  $\delta$ : 5.56 (ddt, 1H,  $^3J_{\text{H-P(cis)}} = 21.4$  Hz,  $^2J_{\text{H-H}} = 1.5$  Hz,  $^4J_{\text{H-H}} = 1.2$  Hz), 5.39 (ddt, 1H,  $^3J_{\text{H-P(trans)}} = 44.3$  Hz,  $^4J_{\text{H-H}} = 1.8$  Hz,  $^2J_{\text{H-H}} = 1.5$  Hz), 2.12 (dddq, 2H,  $^3J_{\text{H-P}} = 10.3$  Hz,  $^3J_{\text{H-H}} = 7.3$  Hz,  $^4J_{\text{H-H}} = 1.8$  Hz,  $^4J_{\text{H-P}} = 1.2$  Hz), 0.95 (t, 3H,  $^3J_{\text{H-H}} = 7.3$  Hz).

**Table S8.** Comparison of chemical shifts and coupling constants on  $^1\text{H}$  and  $^{31}\text{P}$  NMR spectra of (E)-1-methylprop-1-en-1-ylphosphonic acid (**7i**) with spectra of structurally similar (E)-2-(N-hydroxylamino)-1-methyl-pent-1-en-1-ylphosphonic acid.

| Structure           | 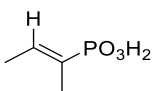 |  |
|---------------------|-------------------------------------------------------------------------------------|---------------------------------------------------------------------------------------|
| Source              | ABr1214                                                                             | Reference [14]                                                                        |
| Solvent             | $\text{D}_2\text{O}$                                                                | $\text{D}_2\text{O}$                                                                  |
| $^{31}\text{P}$ NMR | 17.47 (dq, $J = 21.7, 13.6, 3.7$ Hz)                                                | n. d.                                                                                 |
| $^1\text{H}$ NMR    | 6.15 (ddq, 1H, $J = 21.7, 6.7, 1.5$ Hz)                                             | 6.12 (dd, 1H, $J = 9.8, 21.2$ Hz)                                                     |
|                     |                                                                                     | 4.35 (m, 1H)                                                                          |
|                     |                                                                                     | 2.05 (m, 2H)                                                                          |
|                     | 1.63 (ddq, 3H, $J = 13.6, 1.2, 1.2$ Hz)                                             | 2.02 (d, 3H, $J = 13.8$ Hz)                                                           |
|                     | 1.57 (ddq, 3H, $J = 6.7, 3.7, 1.2$ Hz)                                              | 1.04 (t, 3H, $J = 7.4$ Hz)                                                            |

**Table S9.** Comparison of chemical shifts and coupling constants on  $^1\text{H}$  and  $^{31}\text{P}$  NMR spectra of the reaction products of 1-amino-1-methylpropylphosphonic acid (**1i**) with  $\text{NaNO}_2$  with spectra of 1-hydroxy-1-methylethylphosphonic acid (**5m**) and 1-methylvinylphosphonic acid (**7'm**).

| Structure           |                                       |                               |                                               |                                         |
|---------------------|---------------------------------------|-------------------------------|-----------------------------------------------|-----------------------------------------|
| Source              | ABr1214                               | ABr1204                       | ABr1214                                       | ABr1204                                 |
| Solvent             | $\text{D}_2\text{O}$                  | $\text{D}_2\text{O}$          | $\text{D}_2\text{O}$                          | $\text{D}_2\text{O}$                    |
| $^{31}\text{P}$ NMR | 24.18 (ddq, $J = 14.5, 11.1, 7.0$ Hz) | 23.84 (septet, $J = 14.0$ Hz) | 15.63 (ddt, $J = 44.4, 21.5, 10.3$ Hz)        | 15.21 (ddq, $J = 43.9, 20.6, 13.1$ Hz)  |
| $^1\text{H}$ NMR    | 1.49–1.70 (m, 2H, $J$ undetermined)   |                               | 5.56 (ddt, 1H, $J = 21.4, 1.5, 1.2$ Hz)       | 5.46 (ddq, 1H, $J = 20.3, 2.1, 1.2$ Hz) |
|                     | 1.17 (d, 3H, $J = 14.4$ Hz)           | 1.23 (d, 6H, $J = 13.8$ Hz)   | 5.39 (ddt, 1H, $J = 44.3, 1.8, 1.5$ Hz)       | 5.36 (tq, 1H, $J = 43.4, 1.8$ Hz)       |
|                     | 0.81 (t, 3H, $J = 7.3$ Hz)            |                               | 2.12 (dddq, 2H, $J = 10.3, 7.3, 1.8, 1.2$ Hz) | 1.77 (dt, 3H, $J = 13.1, 1.2$ Hz)       |
|                     |                                       |                               | 0.95 (t, 3H, $J = 7.3$ Hz).                   |                                         |

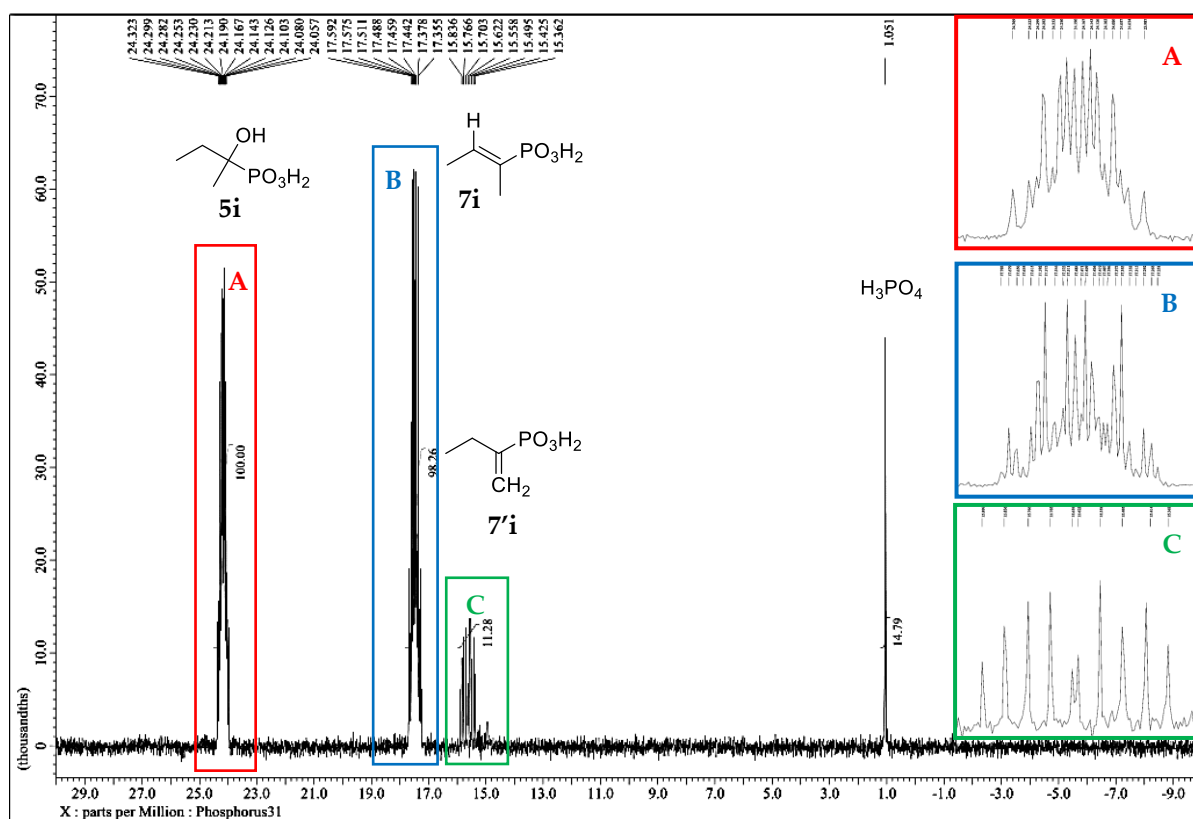

**Figure S31.**  $^{31}\text{P}$  NMR (D $_2$ O, 162 MHz) spectra of the crude post-reaction mixture of 1-amino-1-methylpropylphosphonic acid (**1i**) with  $\text{NaNO}_2$  after 192 h.

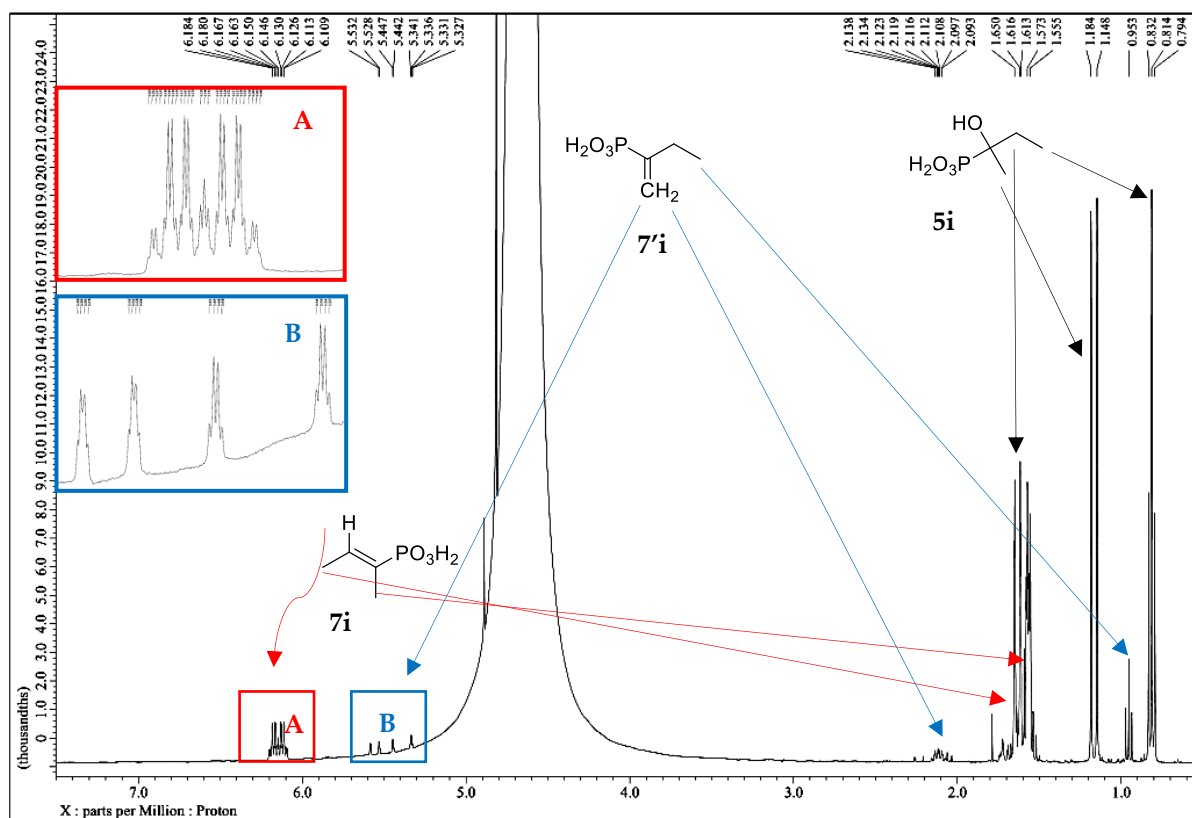

**Figure S32.**  $^1\text{H}$  NMR ( $\text{D}_2\text{O}$ , 400MHz) spectra of the crude post-reaction mixture of 1-amino-1-methylpropylphosphonic acid (**1i**) with  $\text{NaNO}_2$  after 192 h.

3.8. ABr1216. Deamination of **11** in Water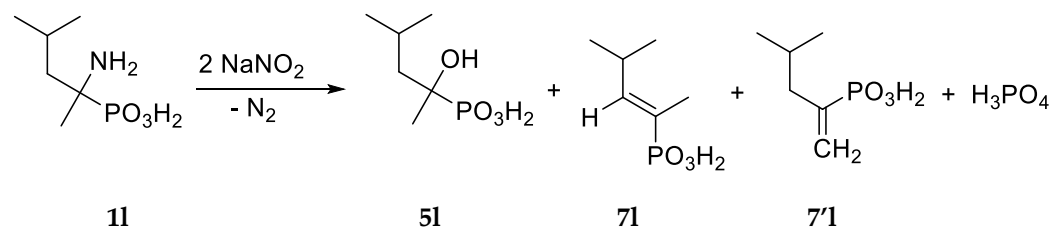

|                  | <b>11</b>       | <b>51</b>  | <b>71</b>   | <b>7'1</b> |      |
|------------------|-----------------|------------|-------------|------------|------|
| 24 h             | $\alpha = 0.97$ | 29%        | 57%         | 7%         | 3%   |
| 192 h            | $\alpha = 1.00$ | 30%        | 59%         | 7%         | 4%   |
| $\delta_P$ [ppm] | 16.82           | 24.18 (tq) | 17.87 (ddq) | 15.6 (ddt) | 1.09 |

After 24 h at 21 °C, post-reaction mixture contained 1-hydroxy-1,3-dimethylbutylphosphonic acid (**51**) (29%molP), (*E*)-1,3-dimethylbut-1-en-1-ylphosphonic acid (**71**) (57%molP), 4-methylpent-1-en-2-ylphosphonic acid (**7'1**) (7%molP), orthophosphoric acid (3%molP), unreacted substrate (**11**) (3%molP) and unidentified compound (ca. 1%molP).

After 192 h post-reaction mixture contained 1-hydroxy-1,3-dimethylbutylphosphonic acid (**51**) (30%molP), (*E*)-1,3-dimethylbut-1-en-1-ylphosphonic acid (**71**) (59%molP), 4-methylpent-1-en-2-ylphosphonic acid (**7'1**) (7%molP), orthophosphoric acid (4%molP) and trace amounts of unidentified compound (>1%molP) (Figure S33 and Figure S34).

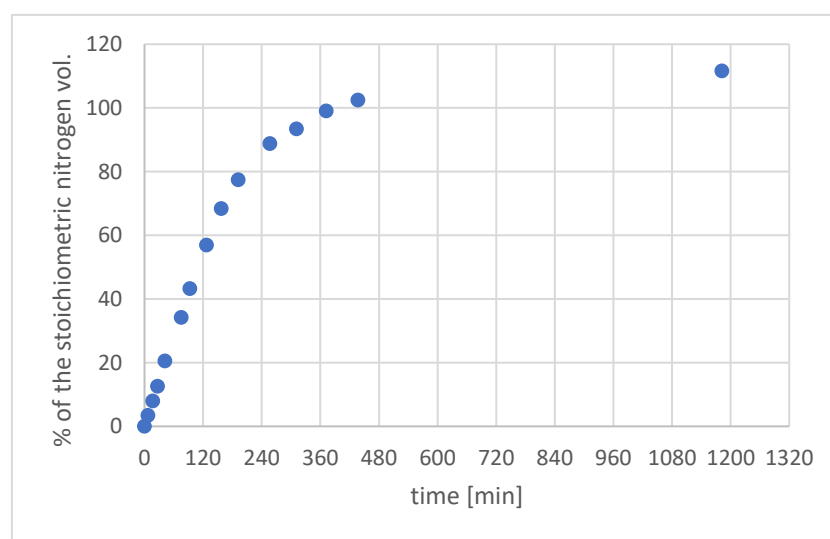

**Chart 8.** Dependence of the volume of the released gas (in % of the stoichiometric nitrogen volume) on the time in the reaction of 1-amino-1,3-dimethylbutylphosphonic acid (**11**) with NaNO<sub>2</sub> in water.

Spectra of (*E*)-1,3-dimethylbut-1-en-1-ylphosphonic acid (**71**) have been not described in the literature. Therefore, this compound was identified by comparing chemical shifts, multiplicity and coupling constants on <sup>1</sup>H and <sup>31</sup>P NMR spectra with spectra of (*E*)-1-methylprop-1-en-1-ylphosphonic acid (**7i**), which was obtained in the reaction of 1-amino-1-methylpropylphosphonic acid (**1i**) with NaNO<sub>2</sub> (ABr1214) (Table S10).

Spectra of 1-hydroxy-1,3-dimethylbutylphosphonic acid (**51**) and 4-methylpent-1-en-2-ylphosphonic acid (**7'1**) have been not described in the literature. Therefore, these compounds were identified by comparing chemical shifts, multiplicity and coupling constants on <sup>1</sup>H and <sup>31</sup>P NMR spectra with spectra of 1-hydroxy-1-methylethylphosphonic

acid (**5m**) and 1-methylvinylphosphonic acid (**7m**), which were obtained in the reaction of 1-amino-1-methylethylphosphonic acid (**1m**) with NaNO<sub>2</sub> (ABr1204) (Table S11).

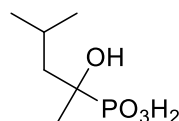

**1-Hydroxy-1,3-dimethylbutylphosphonic acid (5l).** <sup>31</sup>P NMR (D<sub>2</sub>O): δ 24.18 (tq, <sup>3</sup>J<sub>H-P</sub> = 15.0 Hz, <sup>3</sup>J<sub>H-P</sub> = 7.5 Hz); <sup>1</sup>H NMR (D<sub>2</sub>O) δ: 1.78 (doublet of septets, 1H, <sup>3</sup>J<sub>H-H</sub> = 7.0 Hz, <sup>3</sup>J<sub>H-H</sub> = 6.4 Hz), 1.43–1.55 (m, 2H), 1.23 (d, 3H, <sup>3</sup>J<sub>H-P</sub> = 15.0 Hz), 0.81 (d, 3H, <sup>3</sup>J<sub>H-H</sub> = 6.4 Hz), 0.79 (d, 3H, <sup>3</sup>J<sub>H-H</sub> = 6.1 Hz).

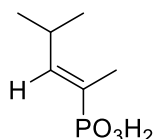

**(E)-1,3-Dimethylbut-1-en-1-ylphosphonic acid (7l).** <sup>31</sup>P NMR (D<sub>2</sub>O): δ 17.87 (ddq, <sup>3</sup>J<sub>H-P</sub> = 22.4 Hz, <sup>3</sup>J<sub>H-P</sub> = 14.0 Hz, <sup>4</sup>J<sub>H-P</sub> = 2.8 Hz); <sup>1</sup>H NMR (D<sub>2</sub>O) δ: 5.88 (ddq, 1H, <sup>3</sup>J<sub>H-P</sub> = 22.2 Hz, <sup>3</sup>J<sub>H-H</sub> = 9.3 Hz, <sup>4</sup>J<sub>H-H</sub> = 1.8 Hz), 2.51 (doublet of doublets of septets, 1H, <sup>3</sup>J<sub>H-H</sub> = 9.3 Hz, <sup>3</sup>J<sub>H-H</sub> = 6.6 Hz, <sup>3</sup>J<sub>H-H</sub> = 2.8 Hz), 1.65 (dd, 3H, <sup>3</sup>J<sub>H-P</sub> = 13.9 Hz, <sup>4</sup>J<sub>H-H</sub> = 1.8 Hz), 0.83 (d, 6H, <sup>3</sup>J<sub>H-H</sub> = 6.7 Hz).

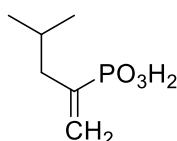

**4-Methylpent-1-en-2-ylphosphonic acid (7l).** <sup>31</sup>P NMR (D<sub>2</sub>O): δ 15.6 (ddt, <sup>3</sup>J<sub>H-P</sub> (trans) = 44.1 Hz, <sup>3</sup>J<sub>H-P</sub> (cis) = 21.0 Hz, <sup>3</sup>J<sub>H-P</sub> = 14.2 Hz); <sup>1</sup>H NMR (D<sub>2</sub>O) δ: 5.61 (ddd, 1H, <sup>3</sup>J<sub>H-P</sub> (cis) = 21.1 Hz, <sup>4</sup>J<sub>H-H</sub> = 2.1 Hz, *J* undetermined), 5.37 (ddd, 1H, <sup>3</sup>J<sub>H-P</sub> (trans) = 44.5 Hz, <sup>4</sup>J<sub>H-H</sub> = 3.4 Hz, <sup>4</sup>J<sub>H-H</sub> = 1.5 Hz), 1.98 (br dddd, 2H, <sup>3</sup>J<sub>H-P</sub> = 14.1 Hz, <sup>3</sup>J<sub>H-H</sub> = 7.0 Hz, *J* nieozn), 1.70–1.85 (m, 1H, *J* undetermined), 0.72 (d, 6H, <sup>3</sup>J<sub>H-H</sub> = 6.7 Hz).

**Table S10.** Comparison of chemical shifts and coupling constants on <sup>1</sup>H and <sup>31</sup>P NMR spectra of (*E*)-1,3-7ldimethylbut-1-en-1-ylphosphonic acid (**7l**) with (*E*)-1-methylprop-1-en-1-ylphosphonic acid (**7i**) (ABr1214).

| Structure           |                                                                        |                                              |
|---------------------|------------------------------------------------------------------------|----------------------------------------------|
| Source              | ABr1216                                                                | ABr1214                                      |
| Solvent             | D <sub>2</sub> O                                                       | D <sub>2</sub> O                             |
| <sup>31</sup> P NMR | 17.87 (ddq, <i>J</i> = 22.4, 14.0, 2.8 Hz)                             | 17.47 (dq, <i>J</i> = 21.7, 13.6, 3.7 Hz)    |
| <sup>1</sup> H NMR  | 5.88 (ddq, 1H, <i>J</i> = 22.2, 9.3, 1.8 Hz),                          | 6.15 (ddq, 1H, <i>J</i> = 21.7, 6.7, 1.5 Hz) |
|                     | 2.51 (doublet of doublets of septets, 1H, <i>J</i> = 9.3, 6.6, 2.8 Hz) |                                              |
|                     | 1.65 (dd, 3H, <i>J</i> = 13.9, 1.8 Hz)                                 | 1.63 (ddq, 3H, <i>J</i> = 13.6, 1.2, 1.2 Hz) |
|                     | 0.83 (d, 6H, <i>J</i> = 6.7 Hz)                                        | 1.57 (ddq, 3H, <i>J</i> = 6.7, 3.7, 1.2 Hz)  |



**Table S11.** Comparison of chemical shifts and coupling constants on  $^1\text{H}$  and  $^{31}\text{P}$  NMR spectra of post-reaction mixture of 1-hydroxy-1,3-dimethylbutylphosphonic acid (**1l**) with  $\text{NaNO}_2$  with 1-hydroxy-1-methylethylphosphonic acid (**5m**) and 1-methylvinylphosphonic acid (**7m**) (ABr1204).

| Structure           |                                                   |                               |                                                      |                                         |
|---------------------|---------------------------------------------------|-------------------------------|------------------------------------------------------|-----------------------------------------|
| Source              | ABr1216                                           | ABr1204                       | ABr1216                                              | ABr1204                                 |
| Solvent             | $\text{D}_2\text{O}$                              | $\text{D}_2\text{O}$          | $\text{D}_2\text{O}$                                 | $\text{D}_2\text{O}$                    |
| $^{31}\text{P}$ NMR | 24.18 (tq, $J = 15.0, 7.5$ Hz)                    | 23.84 (septet, $J = 14.0$ Hz) | 15.6 (ddt, $J = 44.1, 21.0, 14.2$ Hz);               | 15.21 (ddq, $J = 43.9, 20.6, 13.1$ Hz)  |
| $^1\text{H}$ NMR    | 1.78 (doublet of septets, 1H, $J = 7.0, 6.4$ Hz), |                               | 5.61 (ddd, 1H, $J = 21.1, 2.1$ Hz, $J$ undetermined) | 5.46 (ddq, 1H, $J = 20.3, 2.1, 1.2$ Hz) |
|                     | 1.43-1.55 (m, 2H),                                |                               | 5.37 (ddd, 1H, $J = 44.5, 3.4, 1.5$ Hz)              | 5.36 (tq, 1H, $J = 43.4, 1.8$ Hz)       |
|                     | 1.23 (d, 3H, $J = 15.0$ Hz)                       | 1.23 (d, 6H, $J = 13.8$ Hz)   | 1.98 (br dddd, 2H, $J = 14.1, 7.0$ Hz)               | 1.77 (dt, 3H, $J = 13.1, 1.2$ Hz)       |
|                     | 0.81 (d, 3H, $J = 6.4$ Hz)                        |                               | 1.70-1.85 (m, 1H, $J$ undetermined)                  |                                         |
|                     | 0.79 (d, 3H, $J = 6.1$ Hz)                        |                               | 0.72 (d, 6H, $J = 6.7$ Hz)                           |                                         |

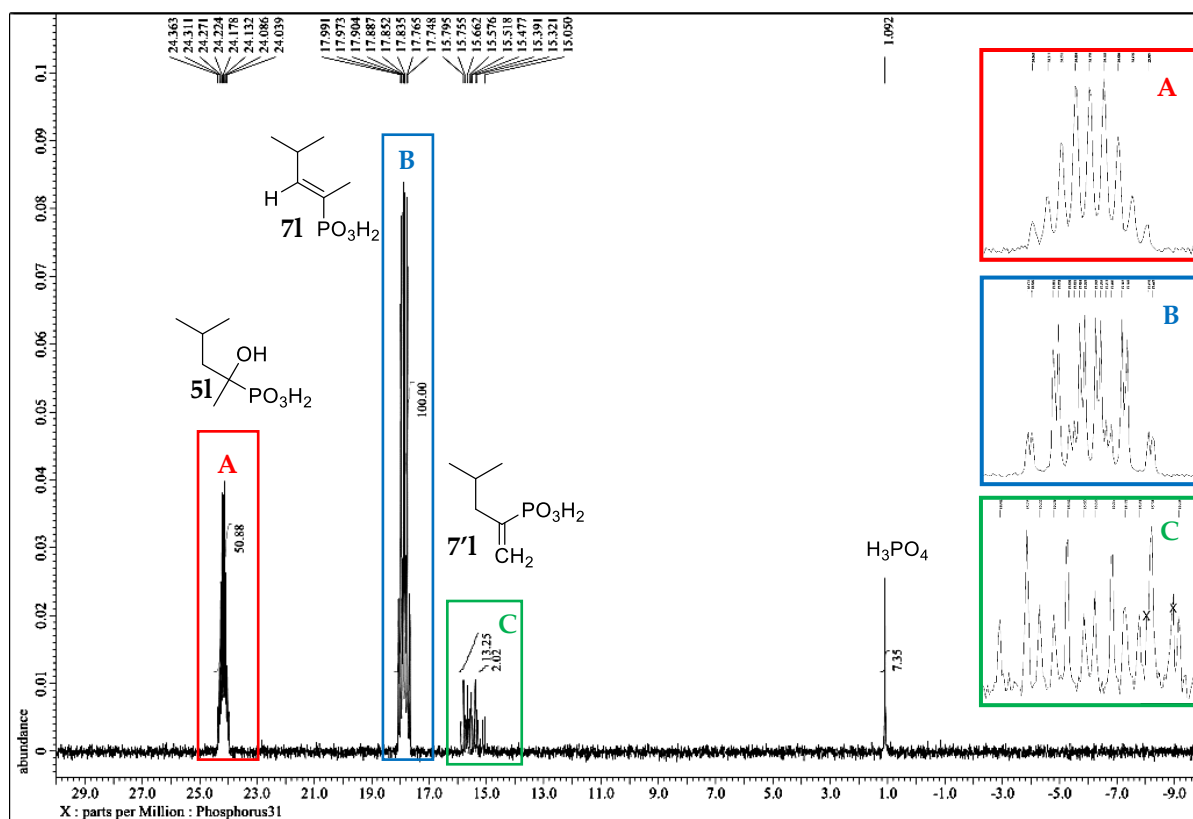

**Figure S33.**  $^{31}\text{P}$  NMR ( $\text{D}_2\text{O}$ , 162MHz) spectra of the crude post-reaction mixture of 1-amino-1,3-dimethylbutylphosphonic acid (**1l**) with  $\text{NaNO}_2$  after 192 h.

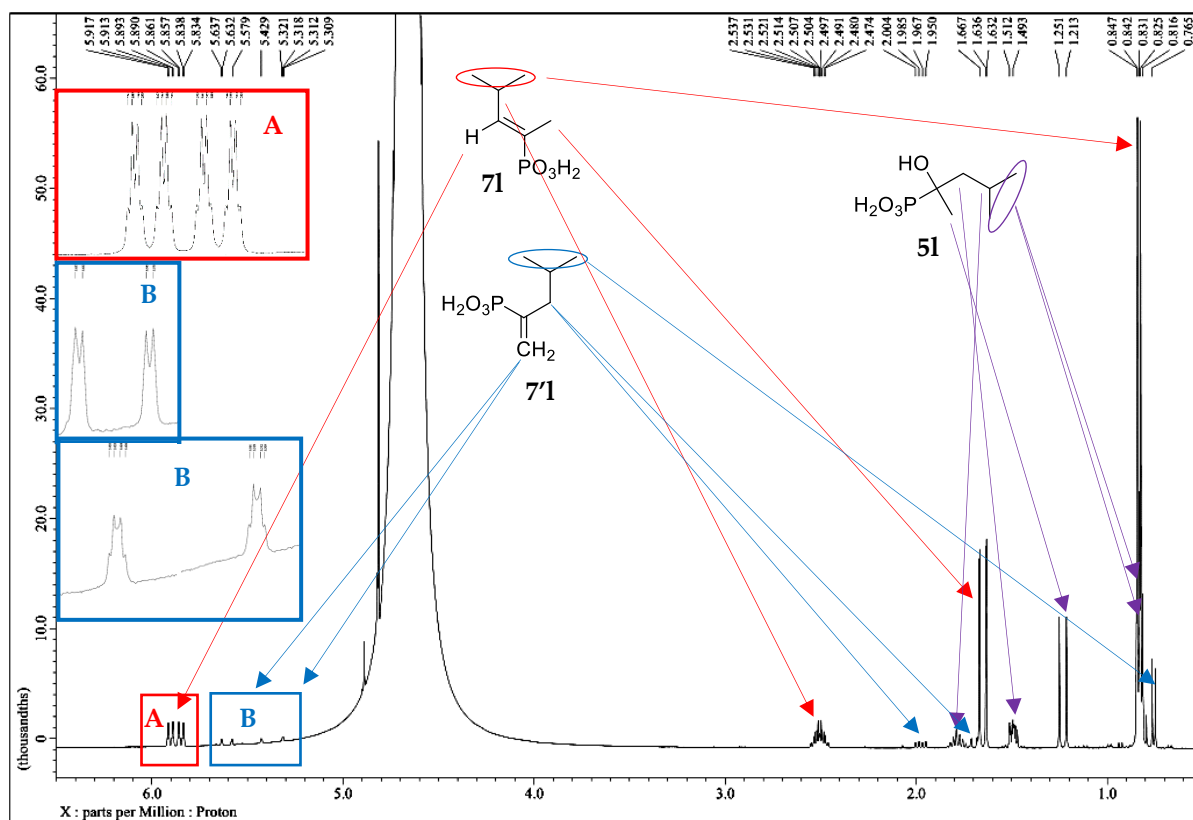

**Figure S34.**  $^1\text{H}$  NMR (D<sub>2</sub>O, 400MHz) spectra of the crude post-reaction mixture of 1-amino-1,3-dimethylbutylphosphonic acid (**11**) with NaNO<sub>2</sub> after 192 h.

3.9. ABr1218. Deamination of **1k** in Water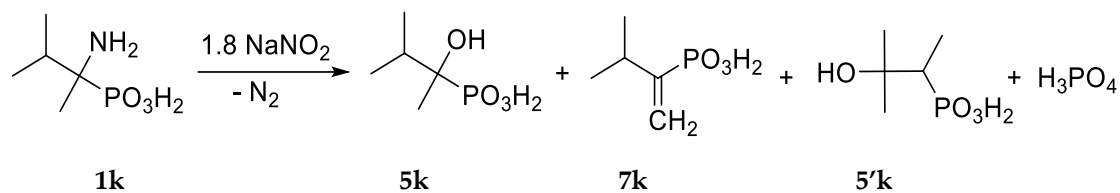

|                  | $\alpha = 0.97$ | 39%        | 8%          | 6%         | 39%  |
|------------------|-----------------|------------|-------------|------------|------|
| 96h              | $\alpha = 1.00$ | 40%        | 8%          | 6%         | 40%  |
| 168h             |                 |            |             |            |      |
| $\delta_P$ [ppm] | 16.82           | 24.06 (dq) | 15.84 (ddd) | 26.36 (dq) | 1.13 |

After 96h at 21 °C, post-reaction mixture contained 1-hydroxy-1,2-dimethylpropylphosphonic acid (**5k**) (39%molP), 3-methylbut-1-en-2-ylphosphonic acid (**7k**) (8%molP), 2-hydroxy-2,3-dimethylpropylphosphonic acid (**5'k**) (6%molP), orthophosphoric acid (39%molP) and 2 unidentified compounds (8%molP in total).

After 168h post-reaction mixture contained 1-hydroxy-1,2-dimethylpropylphosphonic acid (**5k**) (40%molP), 3-methylbut-1-en-2-ylphosphonic acid (**7k**) (8%molP), 2-hydroxy-2,3-dimethylpropylphosphonic acid (**5'k**) (6%molP), orthophosphoric acid (40%molP) and 2 unidentified compounds (6%molP in total) (Figure S35 and Figure S36).

$^{31}\text{P}$  and  $^1\text{H}$  NMR:

**1-Hydroxy-1,2-dimethylpropylphosphonic acid (5k).**  $^{31}\text{P}$  NMR ( $\text{D}_2\text{O}$ ):  $\delta$  24.06 (dq,  $^3J_{\text{H-P}} = 14.0$  Hz,  $^3J_{\text{H-P}} = 8.4$  Hz);  $^1\text{H}$  NMR ( $\text{D}_2\text{O}$ ):  $\delta$ : 1.91 (dq, 1H,  $^3J_{\text{H-P}} = 8.3$  Hz,  $^3J_{\text{H-H}} = 7.0$  Hz,  $^3J_{\text{H-H}} = 6.7$  Hz), 1.10 (d, 3H,  $^3J_{\text{H-P}} = 14.4$  Hz), 0.86 (d, 3H,  $^3J_{\text{H-H}} = 7.0$  Hz), 0.83 (d, 3H,  $^3J_{\text{H-H}} = 6.7$  Hz).

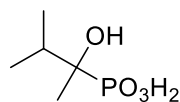

**3-Methylbut-1-en-2-ylphosphonic acid (7k).**  $^{31}\text{P}$  NMR ( $\text{D}_2\text{O}$ ):  $\delta$  15.84 (ddd,  $^3J_{\text{H-P(trans)}} = 45.1$  Hz,  $^3J_{\text{H-P(cis)}} = 22.0$  Hz,  $^3J_{\text{H-P}} = 12.2$  Hz);  $^1\text{H}$  NMR ( $\text{D}_2\text{O}$ ):  $\delta$ : 5.59 (ddd, 1H,  $^3J_{\text{H-P(trans)}} = 45.2$  Hz,  $^3J_{\text{H-H}} = 1.5$  Hz,  $^4J_{\text{H-H}} = 1.2$  Hz), 5.45 (ddd, 1H,  $^3J_{\text{H-P(cis)}} = 22.0$  Hz,  $^3J_{\text{H-H}} = 1.2$  Hz,  $J$  undetermined), 2.46 (br septet, 1H,  $^3J_{\text{H-H}} = 6.7$  Hz), 0.96 (d, 6H,  $^3J_{\text{H-H}} = 6.7$  Hz).

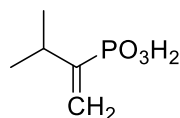

**2-Hydroxy-2,3-dimethylpropylphosphonic acid (5'k).**  $^{31}\text{P}$  NMR ( $\text{D}_2\text{O}$ ):  $\delta$  26.36 (dq,  $^2J_{\text{H-P}} = 17.8$  Hz,  $^3J_{\text{H-P}} = 16.8$  Hz);  $^1\text{H}$  NMR ( $\text{D}_2\text{O}$ ):  $\delta$ : 1.74 (dq, 1H,  $^2J_{\text{H-P}} = 18.3$  Hz,  $^3J_{\text{H-H}} = 7.6$  Hz), 1.19 (s, 3H), 1.11 (s, 3H), 1.00 (dd, 3H,  $^3J_{\text{H-P}} = 16.7$  Hz,  $^3J_{\text{H-H}} = 7.6$  Hz).

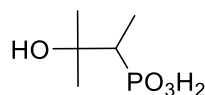

1-Hydroxy-1,2-dimethylpropylphosphonic acid (**5k**) and 3-methylbut-1-en-2-ylphosphonic acid (**7k**) were identified by comparing chemical shifts, multiplicity and coupling constants on  $^1\text{H}$  and  $^{31}\text{P}$  NMR spectra with a description of structurally similar 1-hydroxy-1-methylethylphosphonic acid (**5m**) and 1-methylvinylphosphonic acid (**7m**), which were obtained in the reaction of 1-amino-1-methylethylphosphonic acid (**1m**) with  $\text{NaNO}_2$  (ABr1204) (Table S12).

2-hydroxy-2,3-dimethylpropylphosphonic acid (**5'k**) was identified by comparing chemical shifts, multiplicity and coupling constants on  $^1\text{H}$  and  $^{31}\text{P}$  NMR spectra with z description of structurally similar 2-hydroxypropylphosphonic acid (Table S13).

**Table S12.** Comparison of chemical shifts and coupling constants on  $^1\text{H}$  and  $^{31}\text{P}$  NMR spectra of the reaction products of 1-amino-1,2-dimethylpropylphosphonic acid (**1k**) z  $\text{NaNO}_2$  with spectra of similar 1-hydroxy-1-methylethylphosphonic acid (**5m**) and 1-methylvinylphosphonic acid (**7m**) (ABr1204).

| Structure           | 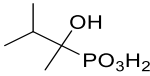 |  |  |  |
|---------------------|-----------------------------------------------------------------------------------|-----------------------------------------------------------------------------------|------------------------------------------------------------------------------------|-------------------------------------------------------------------------------------|
| Source              | ABr1218                                                                           | ABr1204                                                                           | ABr1218                                                                            | ABr1204                                                                             |
| Solvent             | D <sub>2</sub> O                                                                  | D <sub>2</sub> O                                                                  | D <sub>2</sub> O                                                                   | D <sub>2</sub> O                                                                    |
| $^{31}\text{P}$ NMR | 24.06 (dq, $J = 14.0, 8.4$ Hz)                                                    | 23.84 (septet, $J = 14.0$ Hz)                                                     | 15.84 (ddd, $J = 45.1, 22.0, 12.2$ Hz)                                             | 15.21 (ddq, $J = 43.9, 20.6, 13.1$ Hz)                                              |
| $^1\text{H}$ NMR    | 1.91 (dq, 1H, $J = 8.3, 7.0, 6.7$ Hz)                                             |                                                                                   | 5.59 (ddd, 1H, $J = 45.2, 1.5, 1.2$ Hz)                                            | 5.46 (ddq, 1H, $J = 20.3, 2.1, 1.2$ Hz)                                             |
|                     | 1.10 (d, 3H, $J = 14.4$ Hz)                                                       | 1.23 (d, 6H, $J = 13.8$ Hz)                                                       | 5.45 (ddd, 1H, $J = 22.0, 1.2$ Hz, $J$ undetermined),                              | 5.36 (tq, 1H, $J = 43.4, 1.8$ Hz)                                                   |
|                     | 0.86 (d, 3H, $J = 7.0$ Hz)                                                        |                                                                                   | 2.46 (br septet, 1H, $J = 6.7$ Hz)                                                 | 1.77 (dt, 3H, $J = 13.1, 1.2$ Hz)                                                   |
|                     | 0.83 (d, 3H, $J = 6.7$ Hz)                                                        |                                                                                   | 0.96 (d, 6H, $J = 6.7$ Hz)                                                         |                                                                                     |

**Table S13.** Comparison of chemical shifts and coupling constants on  $^1\text{H}$  and  $^{31}\text{P}$  NMR spectra of the reaction products of 1-hydroxy-1,2-dimethylpropylphosphonic acid (**5'k**) with spectra of similar 2-hydroxypropylphosphonic acid.

| Structure           | 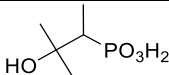 |  |
|---------------------|-------------------------------------------------------------------------------------|---------------------------------------------------------------------------------------|
| Source              | ABr1218                                                                             | Reference [9]                                                                         |
| Solvent             | D <sub>2</sub> O                                                                    | D <sub>2</sub> O                                                                      |
| $^{31}\text{P}$ NMR | 26.36 (dq, $J = 17.8, 16.8$ Hz)                                                     | 19.9                                                                                  |
| $^1\text{H}$ NMR    |                                                                                     | 3.80 (1H, dm, $J = 6.5$ Hz)                                                           |
|                     | 1.74 (dq, 1H, $J = 18.3, 7.6$ Hz),                                                  | 1.39 (2H, ddd, $J = 18.0, 6.6, 15.3$ Hz)                                              |
|                     | 1.19 (s, 3H),                                                                       | 0.97 (3H, d, $J = 6.5$ Hz)                                                            |
|                     | 1.11 (s, 3H),                                                                       |                                                                                       |
|                     | 1.00 (dd, 3H, $J = 16.7, J = 7.6$ Hz)                                               |                                                                                       |

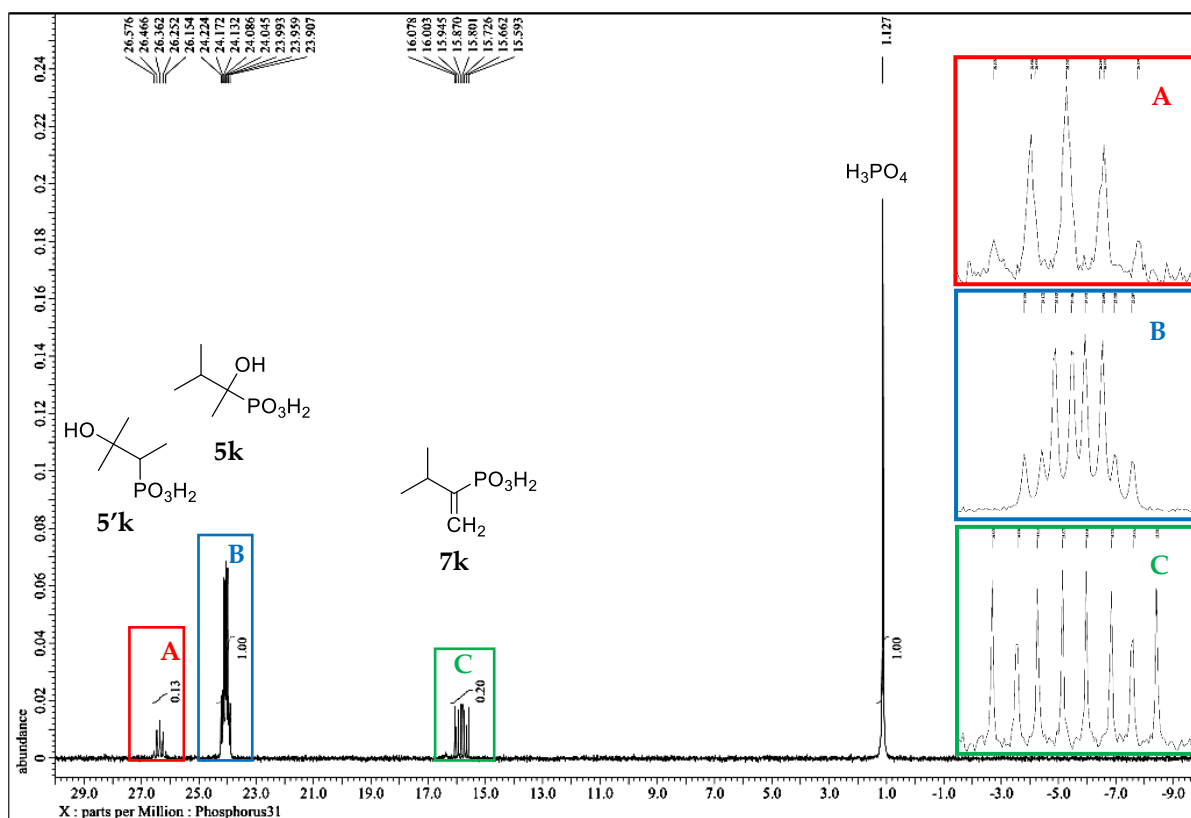

Figure S35.  $^{31}\text{P}$  NMR (D $_2$ O, 162 MHz) spectra of the crude post-reaction mixture of 1-amino-1,2-dimethylpropylphosphonic acid (**1k**) z NaNO $_2$  after 168h.

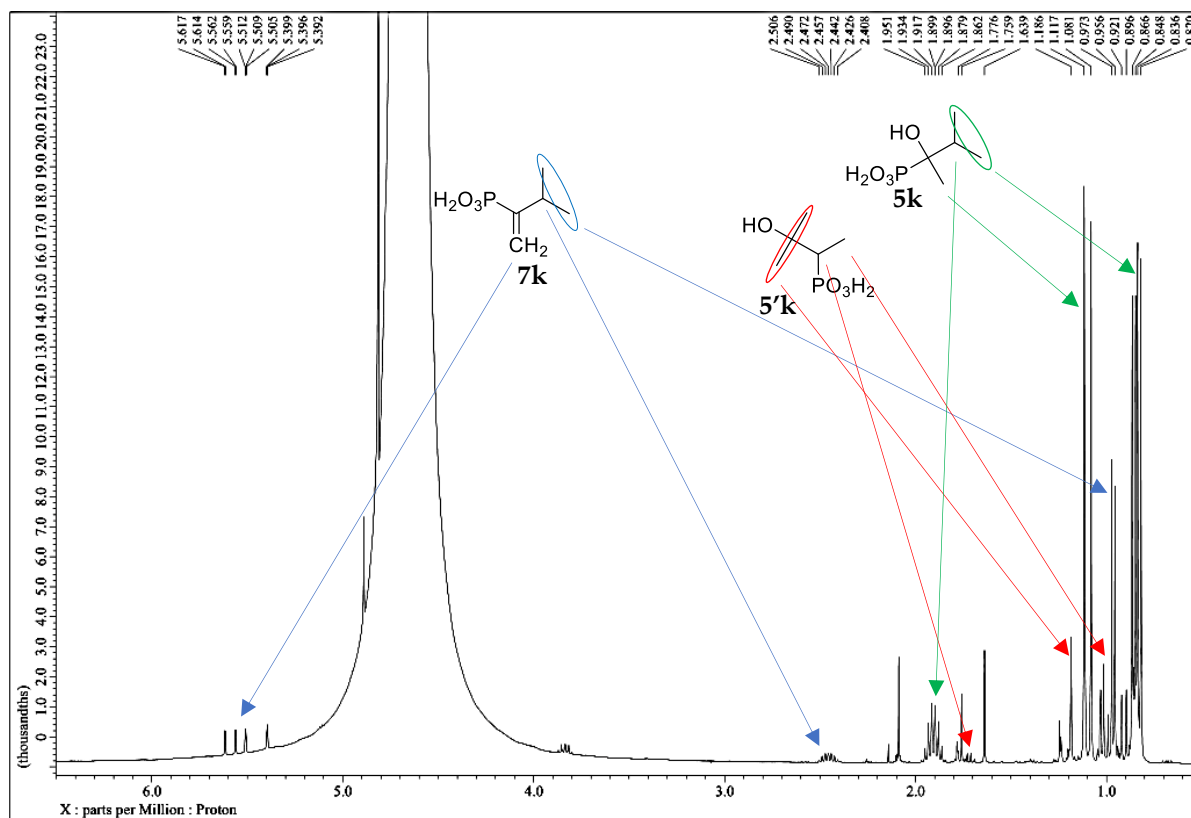

Figure S36.  $^1\text{H}$  NMR (D $_2$ O, 400 MHz) spectra of the crude post-reaction mixture of 1-amino-1,2-dimethylpropylphosphonic acid (**1k**) z NaNO $_2$  after 168h.

3.10. ABr1220. Deamination of **1j** in Water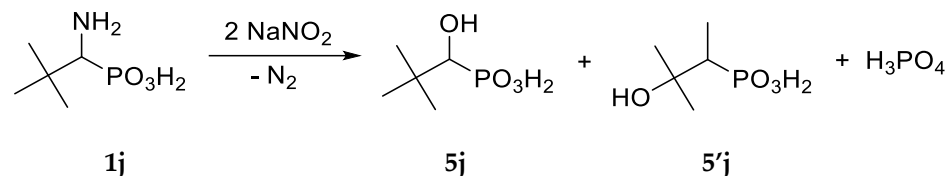

|                  |                 |           |            |      |
|------------------|-----------------|-----------|------------|------|
| 96h              | $\alpha = 1.00$ | 7%        | 6%         | 86%  |
| $\delta_P$ [ppm] |                 | 19.91 (d) | 26.44 (dq) | 0.86 |

After 96h at 21 °C, post-reaction mixture contained orthophosphoric acid (86%molP), 1-hydroxy-2,2-dimethylpropylphosphonic acid (**5j**) (7%molP), 2-hydroxy-1,2-dimethylpropyl-phosphonic acid (**5'j**) (6%molP) and unidentified compound (1%molP) (Figure S37 and Figure S38).

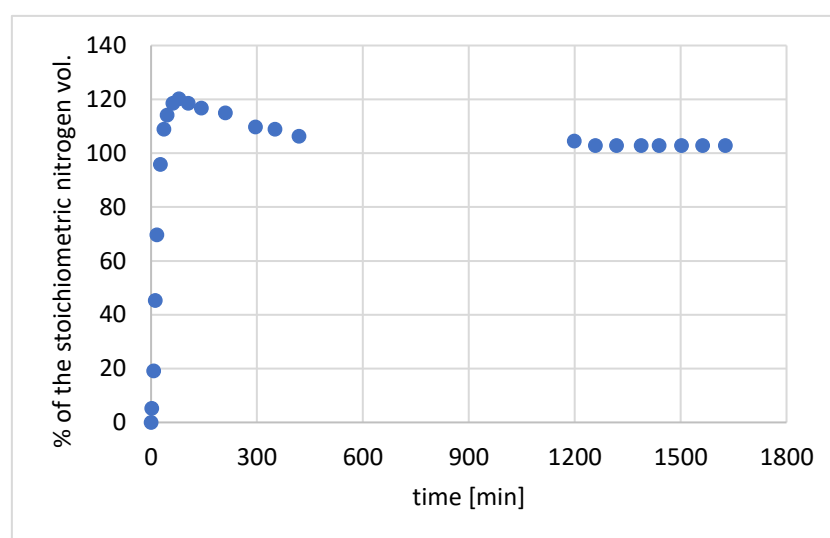

**Chart 9.** Dependence of the volume of the released gas (in % of the stoichiometric nitrogen volume) on the time in the reaction of 1-amino-2,2-dimethylpropylphosphonic acid (**1j**) with  $\text{NaNO}_2$  in water.

1-Hydroxy-2,2-dimethylpropylphosphonic acid (**5j**) was identified by comparing chemical shifts, multiplicity and coupling constants on  $^1\text{H}$  and  $^{31}\text{P}$  NMR spectra with description in the literature (Table S14). 2-hydroxy-1,2-dimethylpropylphosphonic acid (**5'j**) was identified by comparing chemical shifts, multiplicity and coupling constants on  $^1\text{H}$  and  $^{31}\text{P}$  NMR spectra with description in the literature with description for structurally similar 1-hydroxy-2,2-dimethylpropylphosphonic acid (**5k**), which was obtained in the reaction of 1-amino-1,2-dimethylpropylphosphonic acid (**1k**) with  $\text{NaNO}_2$  (ABr1218) (Table S14).

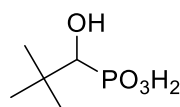

**1-Hydroxy-2,2-dimethylpropylphosphonic acid (5j).**  $^{31}\text{P}$  NMR ( $\text{D}_2\text{O}$ ):  $\delta$  19.91 (d,  $^2J_{\text{H-P}} = 9.4$  Hz);  $^1\text{H}$  NMR ( $\text{D}_2\text{O}$ ):  $\delta$ : 3.29 (d, 1H,  $^2J_{\text{H-P}} = 9.8$  Hz), 0.90 (s, 9H).

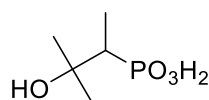

**2-Hydroxy-1,2-dimethylpropylphosphonic acid (5'j).**  $^{31}\text{P}$  NMR ( $\text{D}_2\text{O}$ ):  $\delta$  26.44 (dq,  $^2J_{\text{H-P}} = 17.8$  Hz,  $^3J_{\text{H-P}} = 17.8$  Hz);  $^1\text{H}$  NMR ( $\text{D}_2\text{O}$ ):  $\delta$ : 1.75 (dq, 1H,  $^2J_{\text{H-P}} = 18.8$  Hz,  $^3J_{\text{H-H}} = 7.6$  Hz), 1.18 (s, 3H), 1.11 (s, 3H), 1.00 (dd, 3H,  $^3J_{\text{H-P}} = 16.8$  Hz,  $^3J_{\text{H-H}} = 7.7$  Hz).

**Table S14.** Comparison of chemical shifts and coupling constants on  $^1\text{H}$  and  $^{31}\text{P}$  NMR spectra of post-reaction mixture of 1-amino-2,2-dimethylpropylphosphonic acid (**1j**) z  $\text{NaNO}_2$  with experimental spectra and description in the literature.

| Structure           |                            |                            |                                          |                                          |
|---------------------|----------------------------|----------------------------|------------------------------------------|------------------------------------------|
| Source              | ABr1220                    | Reference [15]             | ABr1220                                  | ABr1218                                  |
| Solvent             | $\text{D}_2\text{O}$       | $\text{DMSO-}d_6$          | $\text{D}_2\text{O}$                     | $\text{D}_2\text{O}$                     |
| $^{31}\text{P}$ NMR | 19.91 (d, $J = 9.4$ Hz)    | n.d.                       | 26.44 (dq, $J = 17.8$ Hz, $J = 17.8$ Hz) | 26.36 (dq, $J = 17.8$ , 16.8 Hz)         |
| $^1\text{H}$ NMR    | 3.29 (d, 1H, $J = 9.8$ Hz) | 3.24 (d, 1H, $J = 8.8$ Hz) | 1.75 (dq, 1H, $J = 18.8$ , 7.6 Hz)       | 1.74 (dq, 1H, $J = 18.3$ , 7.6 Hz),      |
|                     | 0.90 (s, 9H)               | 0.98 (s, 9H)               | 1.18 (s, 3H)                             | 1.19 (s, 3H),                            |
|                     |                            |                            | 1.11 (s, 3H)                             | 1.11 (s, 3H),                            |
|                     |                            |                            | 1.00 (dd, 3H, $J = 16.8$ , 7.7 Hz).      | 1.00 (dd, 3H, $J = 16.7$ , $J = 7.6$ Hz) |

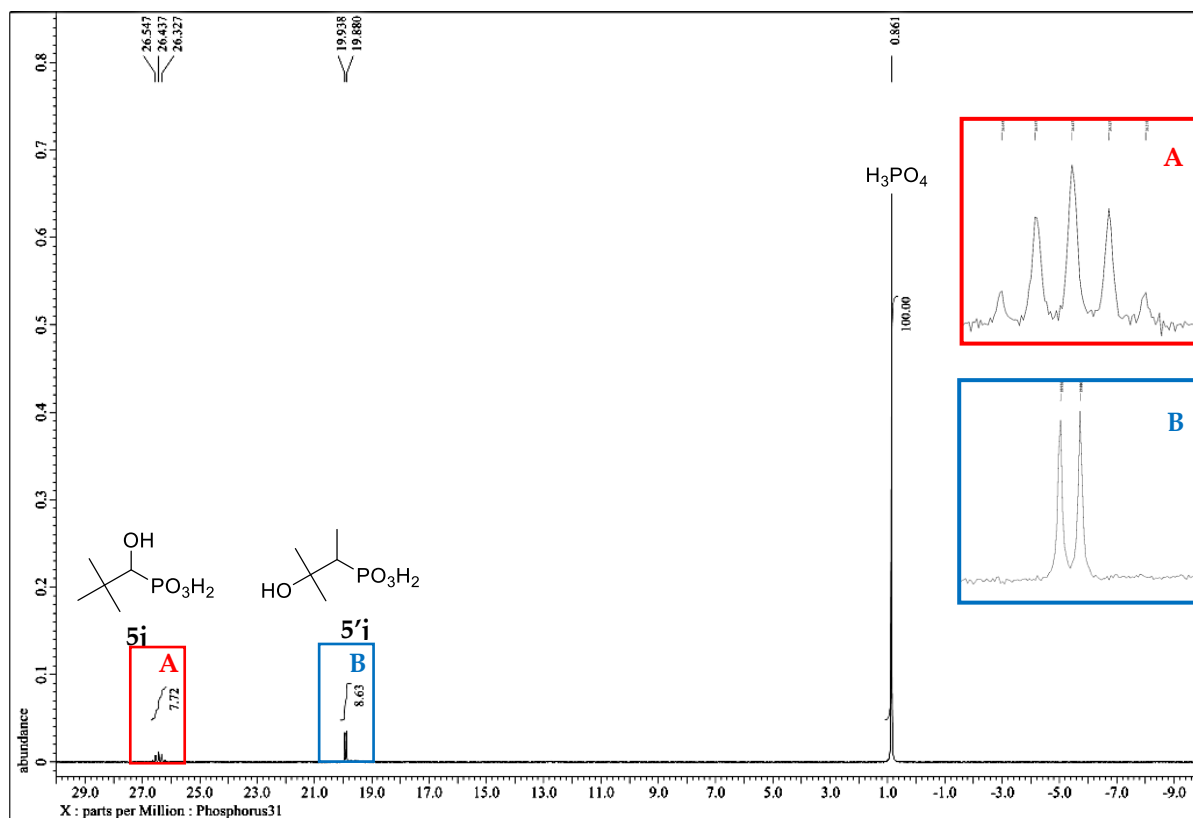

**Figure S37.**  $^{31}\text{P}$  NMR (D<sub>2</sub>O, 162 MHz) spectra of the crude post-reaction mixture of 1-amino-2,2-dimethylpropylphosphonic acid (**1j**) with NaNO<sub>2</sub> after 96h.

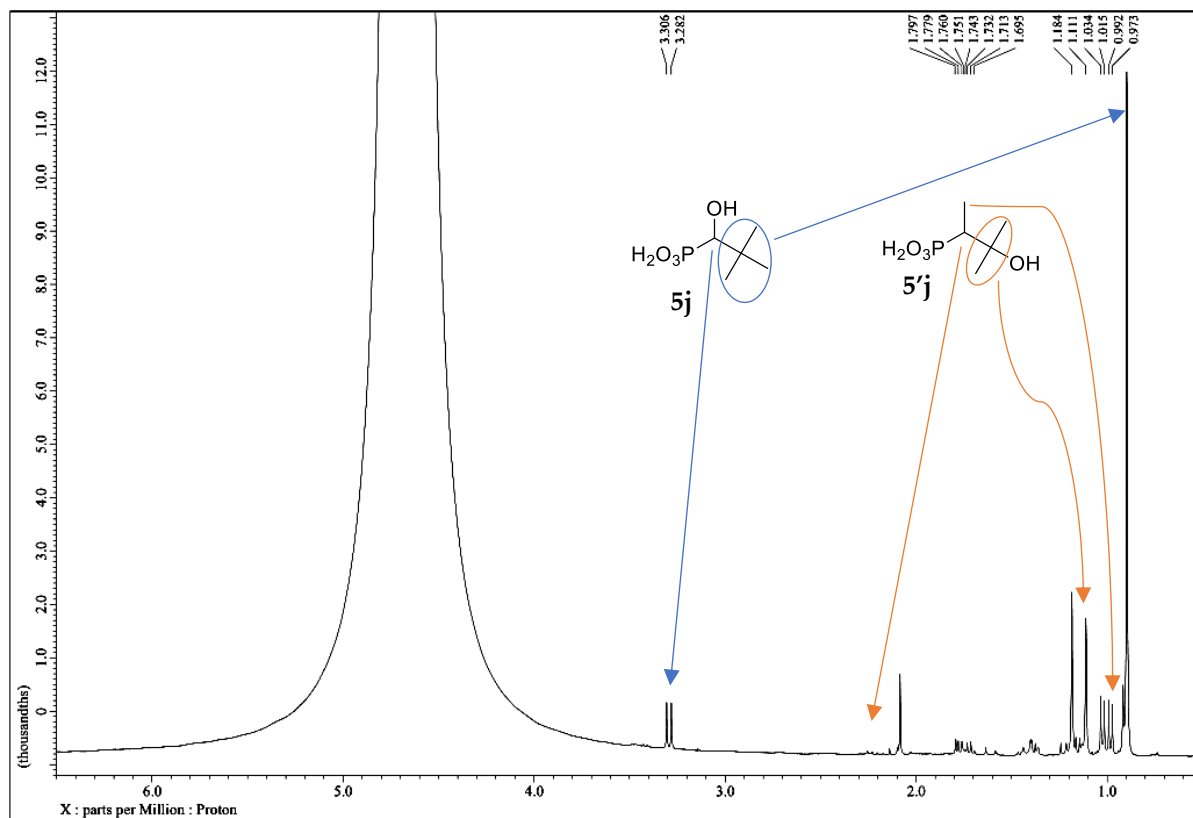

**Figure S38.**  $^1\text{H}$  NMR (D<sub>2</sub>O, 400 MHz) spectra of the crude post-reaction mixture of 1-amino-2,2-dimethylpropylphosphonic acid (**1j**) with NaNO<sub>2</sub> after 96h.



3.11. ABr1222. Deamination of **1q** in Water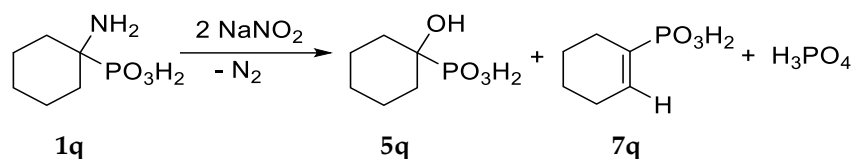

|                           |                 |              |                             |      |
|---------------------------|-----------------|--------------|-----------------------------|------|
| 98h                       | $\alpha = 1.00$ | 16%          | 75%                         | 7%   |
| $\delta_{\text{P}}$ [ppm] |                 | 23.88 (br s) | 16.25 (doublet of quintets) | 1.02 |

After 98h at 21 °C, post-reaction mixture contained 1-hydroxycyclohexylphosphonic acid (**5q**) (16%molP), cyclohex-1-en-1-ylphosphonic acid (**7q**) (75%molP), orthophosphoric acid (7%molP) and 2 unidentified compounds (2%molP in total) (Figure S39 and Figure S41).

The presence of 1-hydroxycyclohexylphosphonic acid (**5q**) was confirmed by re-measuring the NMR spectra of the reaction mixture with the addition of reference material – 1-hydroxycyclohexylphosphonic acid (**5q**) (Figure S40 and Figure S42).

Cyclohex-1-en-1-ylphosphonic acid (**7q**) was identified by comparing chemical shifts, multiplicity and coupling constants on  $^1\text{H}$  and  $^{31}\text{P}$  NMR spectra with description in the literature (Table S15).

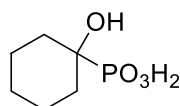

**1-Hydroxycyclohexylphosphonic acid (5q).**  $^{31}\text{P}$  NMR ( $\text{D}_2\text{O}$ ):  $\delta$  23.88 (br s);  $^1\text{H}$  NMR ( $\text{D}_2\text{O}$ ):  $\delta$ : 1.60-1.70 (m, 2H), 1.36-1.58 (m, 7H), 1.00-1.12 (m, 1H).

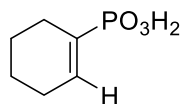

**Cyclohex-1-en-1-ylphosphonic acid (7q).**  $^{31}\text{P}$  NMR ( $\text{D}_2\text{O}$ ):  $\delta$  16.25 (doublet of quintets,  $^3J_{\text{H-P}} = 20.6$  Hz,  $^3J_{\text{H-P}} = 3.7$  Hz);  $^1\text{H}$  NMR ( $\text{D}_2\text{O}$ ):  $\delta$ : 6.28 (dt, 1H,  $^3J_{\text{H-P}} = 21.1$  Hz,  $^3J_{\text{H-H}} = 3.7$  Hz,  $^4J_{\text{H-H}} = 1.8$  Hz), 1.93-2.04 (m, 4H), 1.38-1.52 (m, 4H).

**Table S15.** Comparison of chemical shifts and coupling constants on experimental  $^1\text{H}$  and  $^{31}\text{P}$  NMR spectra of cyclohex-1-en-1-ylphosphonic acid (**7q**) with description in the literature.

| Structure           |                                                 |                       |
|---------------------|-------------------------------------------------|-----------------------|
| Source              | ABr1222                                         | Reference [16]        |
| Solvent             | $\text{D}_2\text{O}$                            | $\text{D}_2\text{O}$  |
| $^{31}\text{P}$ NMR | 16.25 (doublet of quintets, $J = 20.6, 3.7$ Hz) | 14.0 (d, $J = 19$ Hz) |
|                     | 6.28 (dt, 1H, $J = 21.1, 3.7, 1.8$ Hz)          | 6.52 (d, $J = 19$ Hz) |
| $^1\text{H}$ NMR    | 1.93-2.04 (m, 4H)                               |                       |
|                     | 1.38-1.52 (m, 4H)                               |                       |

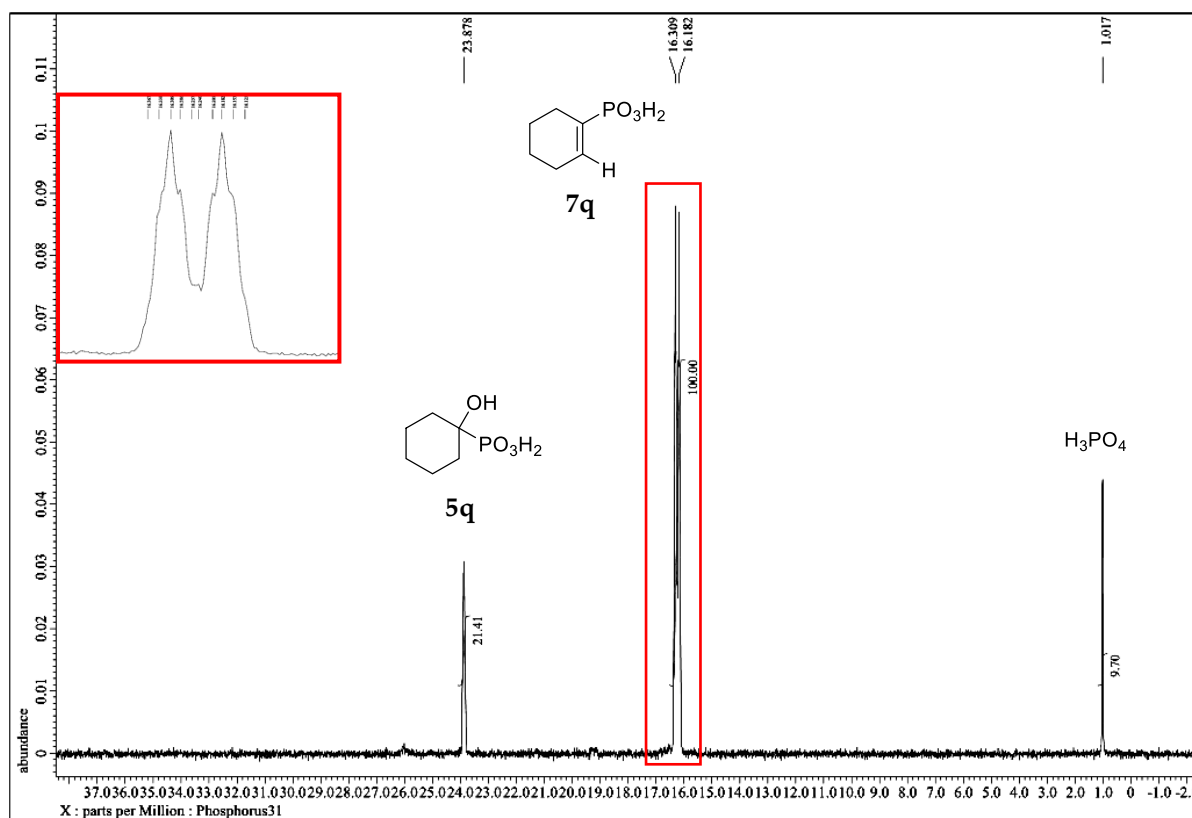

Figure S39.  $^{31}\text{P}$  NMR (D<sub>2</sub>O, 162MHz) spectra of the crude post-reaction mixture of 1-aminocyclohexylphosphonic acid (**1q**) with NaNO<sub>2</sub> after 98h.

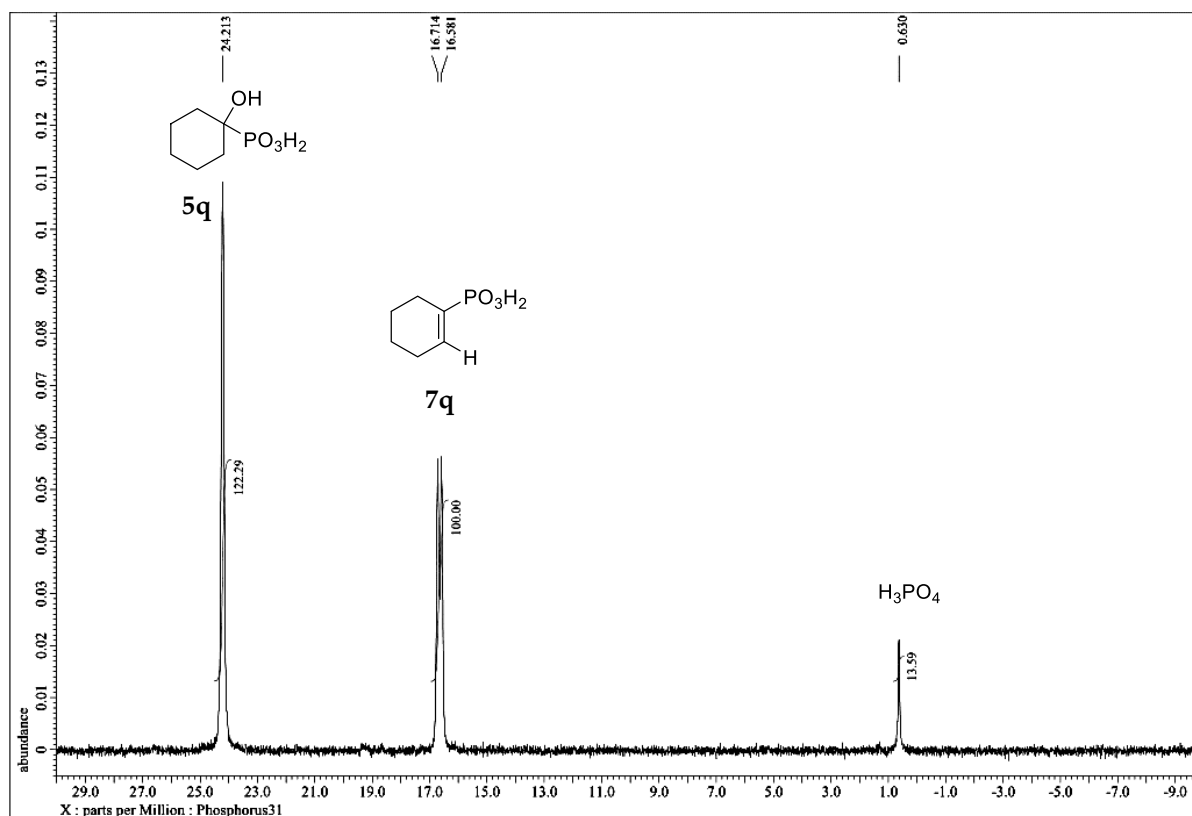

Figure S40.  $^{31}\text{P}$  NMR (D<sub>2</sub>O, 162MHz) spectra of the crude post-reaction mixture of 1-aminocyclohexylphosphonic acid (**1q**) with NaNO<sub>2</sub> after 98h with addition of reference material - 1-hydroxycyclohexylphosphonic acid (**5q**).

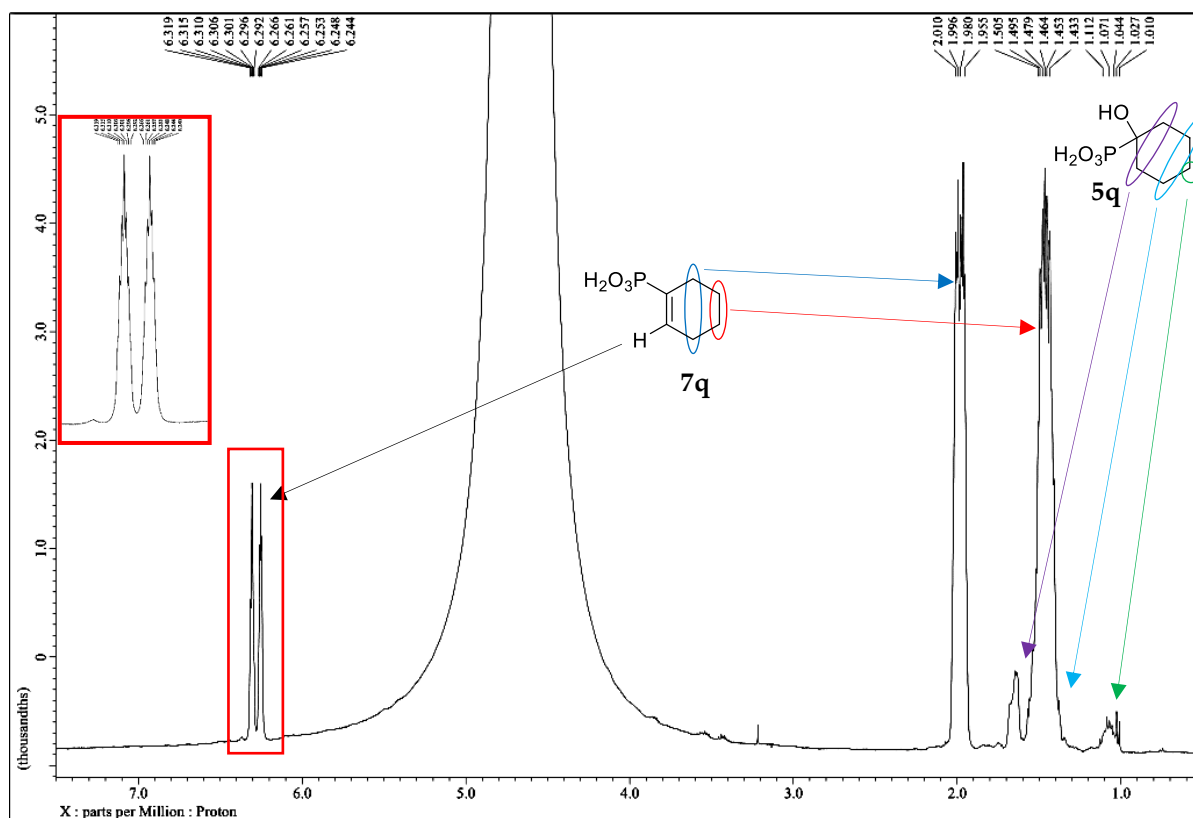

Figure S41.  $^1\text{H}$  NMR (D $_2$ O, 400MHz) spectra of the crude post-reaction mixture of 1-aminocyclohexylphosphonic acid (1q) with NaNO $_2$  after 98h.

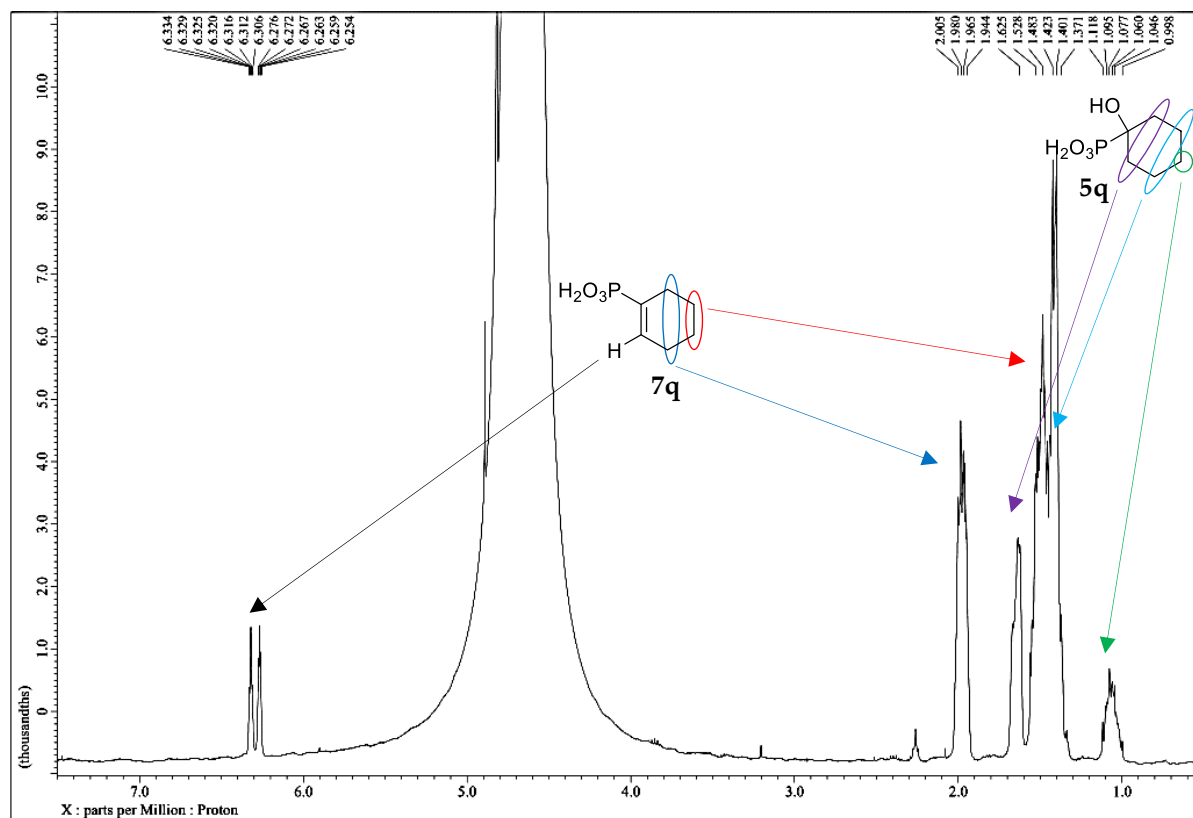

Figure S42.  $^1\text{H}$  NMR spectra of the crude post-reaction mixture of 1-aminocyclohexylphosphonic acid (1q) with NaNO $_2$  after 98h with addition of reference material - 1-hydroxycyclohexylphosphonic acid (5q).

3.12. ABr1224. Deamination of **1f** in Water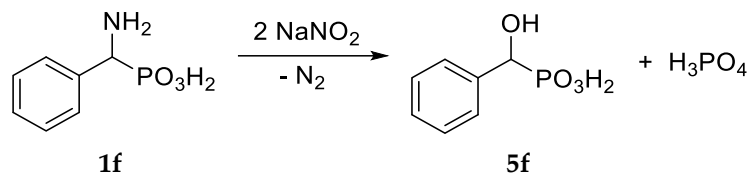

|                                                                                                                                                                                  |                 |           |      |
|----------------------------------------------------------------------------------------------------------------------------------------------------------------------------------|-----------------|-----------|------|
| 24 h                                                                                                                                                                             | $\alpha = 1.00$ | 97%       | 3%   |
| $\delta_P$ [ppm]                                                                                                                                                                 |                 | 17.27 (d) | 0.83 |
| After 24 h at 21 °C, post-reaction mixture contained hydroxy(phenyl)methylphosphonic acid ( <b>5f</b> ) (97%molP) and orthophosphoric acid (3%molP) (Figure S43 and Figure S45). |                 |           |      |

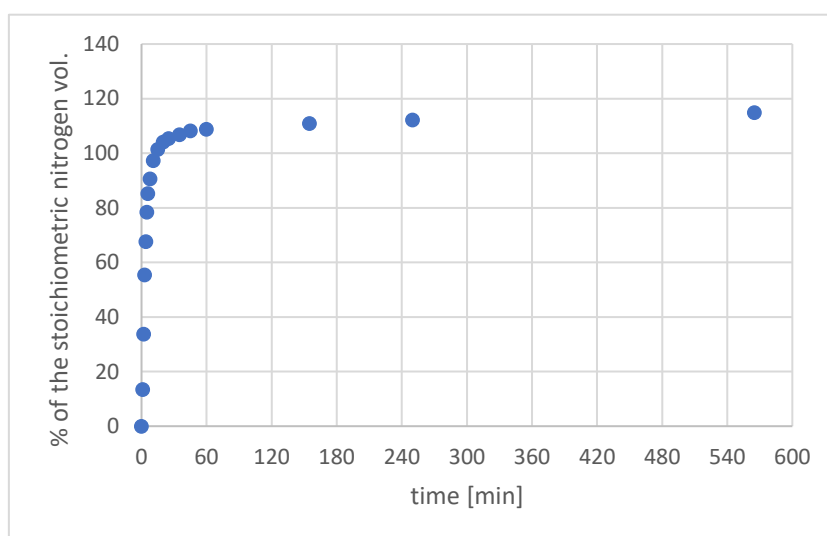

**Chart 10.** Dependence of the volume of the released gas (in % of the stoichiometric nitrogen volume) on the time in the reaction of amino(phenyl)methylphosphonic acid (**1f**) with NaNO<sub>2</sub> in water.

The presence of phenyl(hydroxy)methylphosphonic acid (**5f**) was confirmed by re-measuring the NMR spectra of the reaction mixture with the addition of reference material – phenyl(hydroxy)methylphosphonic acid (**5f**) (Figure S44 and Figure S46).

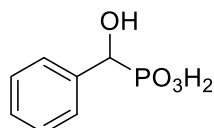

**Hydroxy(phenyl)methylphosphonic acid (**5f**).** <sup>31</sup>P NMR (D<sub>2</sub>O):  $\delta$  17.27 (d,  $^2J_{\text{H-P}} = 12.2$  Hz); <sup>1</sup>H NMR (D<sub>2</sub>O)  $\delta$ : 7.32–7.38 (m, 2H), 7.26–7.32 (m, 2H), 7.20–7.26 (m, 1H), 4.72 (d, 1H,  $^2J_{\text{H-P}} = 12.2$  Hz).

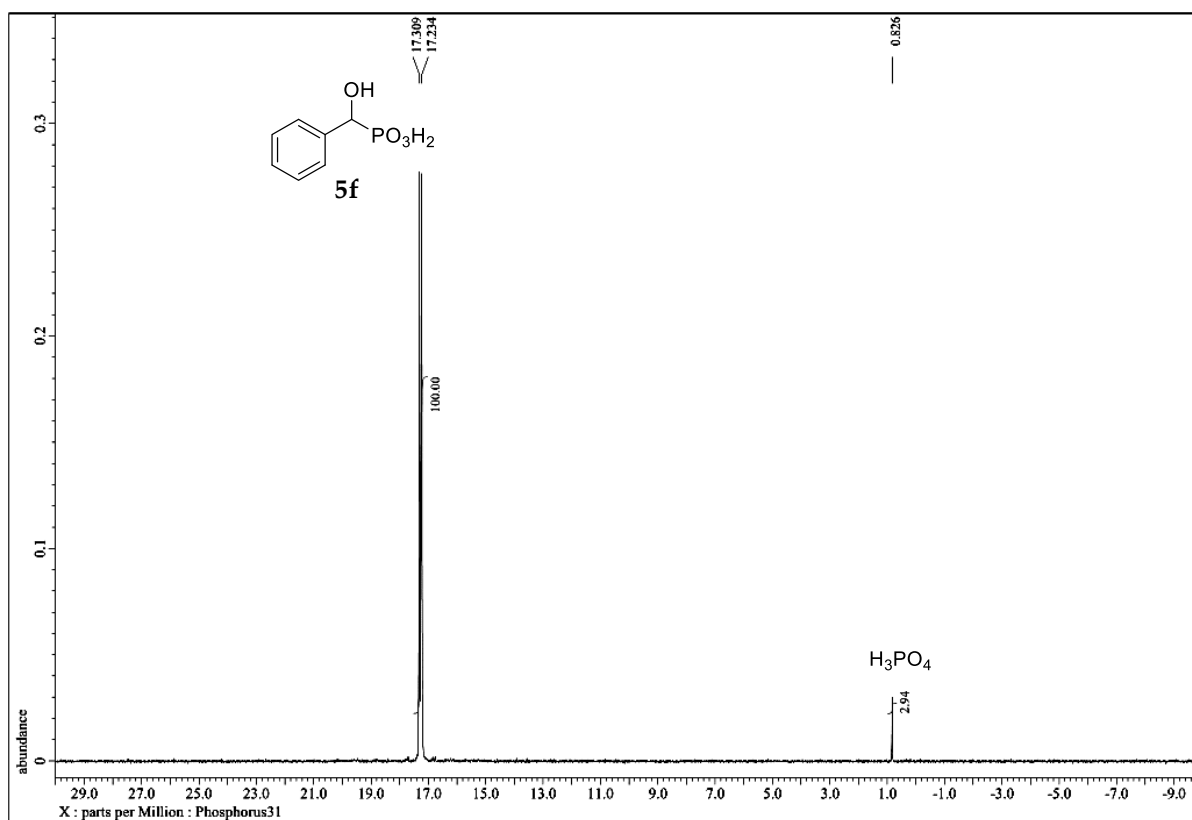

**Figure S43.**  $^{31}\text{P}$  NMR ( $\text{D}_2\text{O}$ , 162MHz) spectra of the crude post-reaction mixture of amino(phenyl)methylphosphonic acid (**1f**) with  $\text{NaNO}_2$  after 24 h.

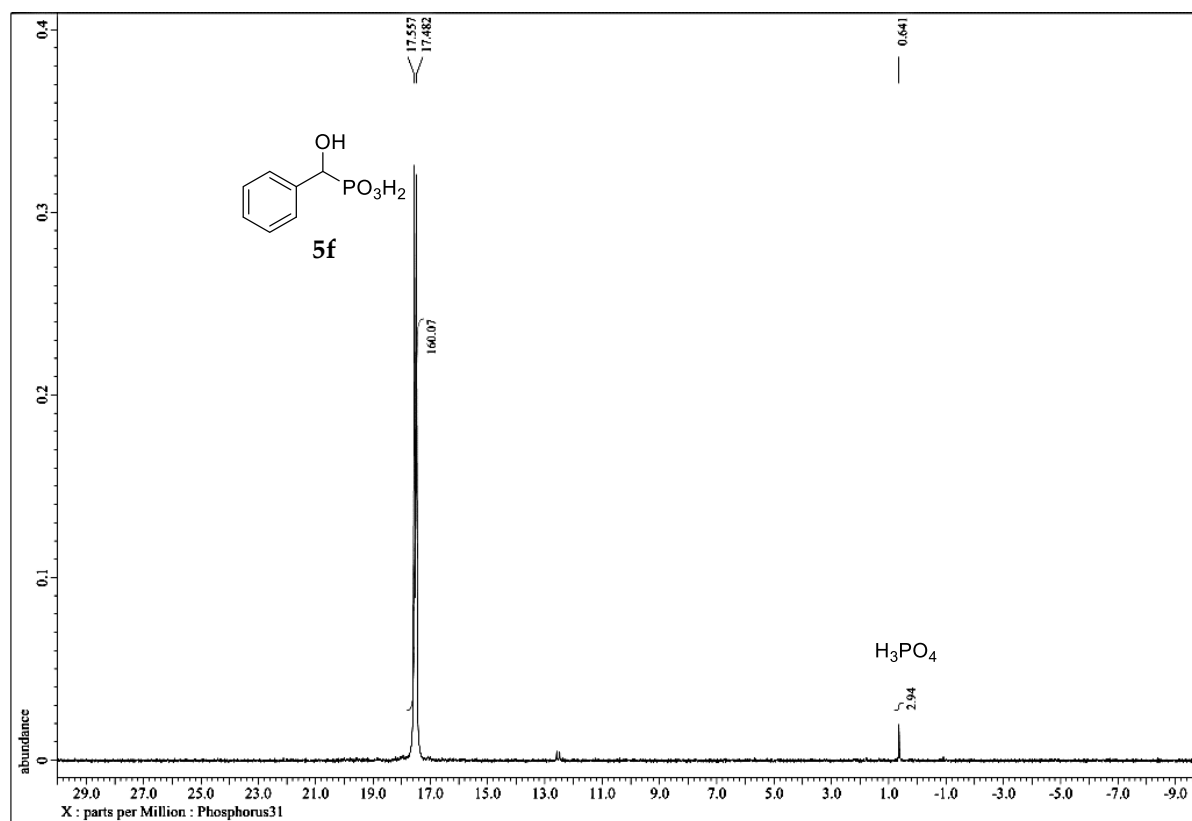

**Figure S44.**  $^{31}\text{P}$  NMR ( $\text{D}_2\text{O}$ , 162MHz) spectra of the crude post-reaction mixture of amino(phenyl)methylphosphonic acid (**1f**) with  $\text{NaNO}_2$  after 24 h with addition of reference material - hydroxy(phenyl)methylphosphonic acid (**5f**).

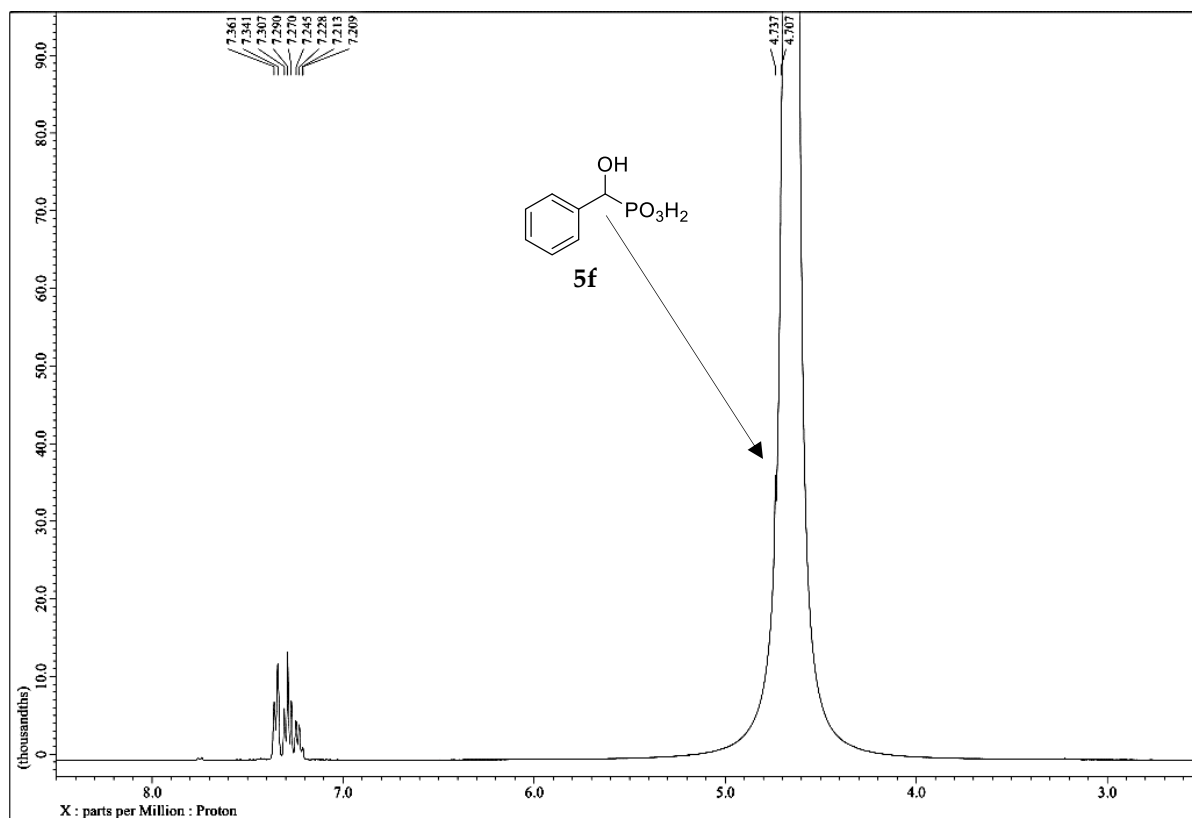

**Figure S45.**  $^1\text{H}$  NMR ( $\text{D}_2\text{O}$ , 400MHz) spectra of the crude post-reaction mixture of amino(phenyl)methylphosphonic acid (**1f**) with  $\text{NaNO}_2$  after 24 h.

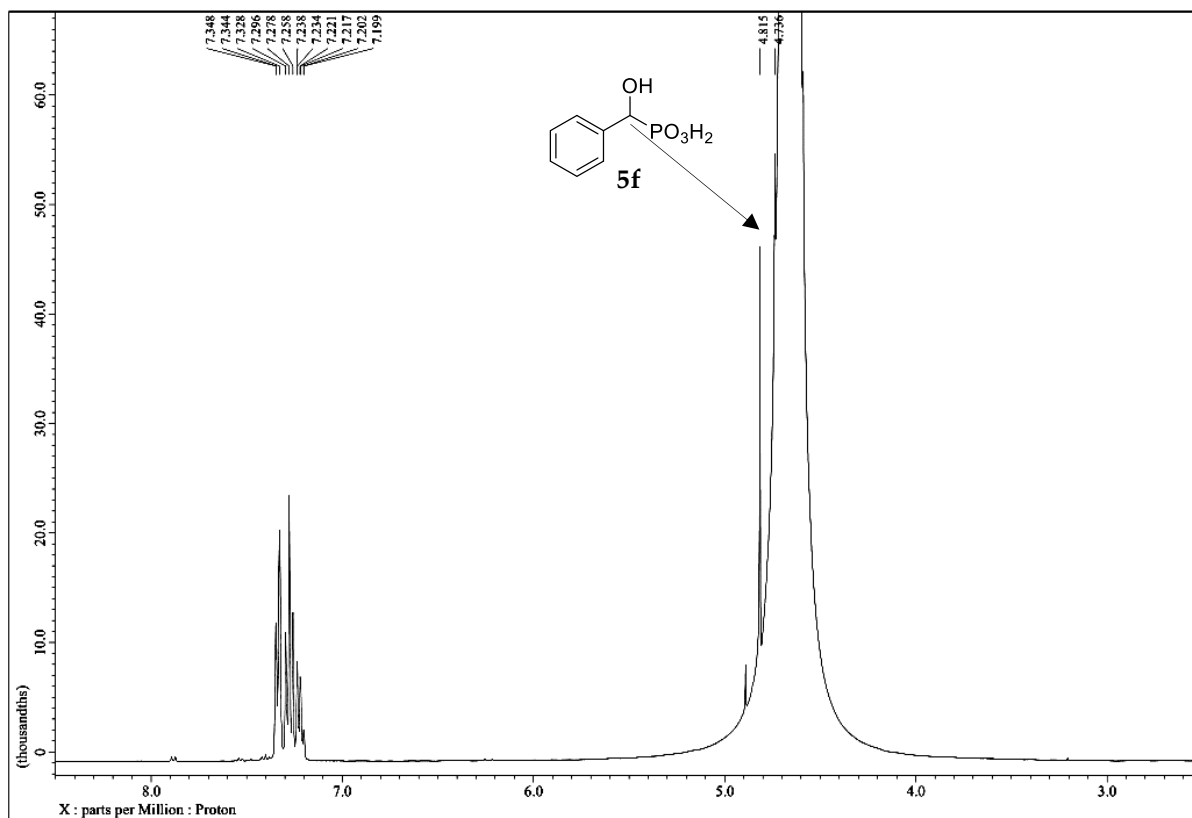

**Figure S46.**  $^1\text{H}$  NMR ( $\text{D}_2\text{O}$ , 400MHz) spectra of the crude post-reaction mixture of amino(phenyl)methylphosphonic acid (**1f**) with  $\text{NaNO}_2$  after 24 h with addition of reference material - hydroxy(phenyl)methylphosphonic acid (**5f**).

3.13. ABr1226. Deamination of **1n** in Water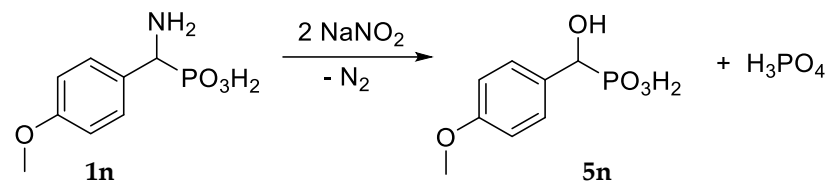

|                           |                 |           |      |
|---------------------------|-----------------|-----------|------|
| 96h                       | $\alpha = 1.00$ | 72%       | 25%  |
| $\delta_{\text{P}}$ [ppm] |                 | 17.23 (d) | 1.68 |

After 144h at 21 °C a suspension was formed. Liquid phase contained hydroxy(4-methoxyphenyl)methylphosphonic acid (**5n**) (72%molP), orthophosphoric acid (25%molP) and 3 unidentified compounds (3%molP in total) (Figure S47 and Figure S48). Precipitate was filtered, washed with water (2 x 1 mL), dried under reduced pressure and orange solid (30mg) was obtained (Figure S51 and Figure S52).

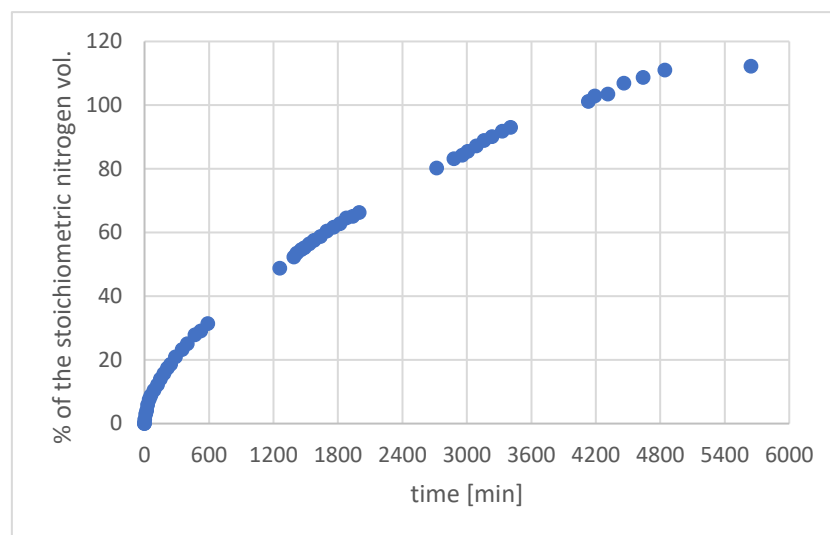

**Chart 11.** Dependence of the volume of the released gas (in % of the stoichiometric nitrogen volume) on the time in the reaction of amino(4-methoxyphenyl)methylphosphonic acid (**1n**) with NaNO<sub>2</sub> in water.

Hydroxy(4-methoxyphenyl)methylphosphonic acid (**5n**) was identified by comparing chemical shifts, multiplicity and coupling constants on <sup>1</sup>H and <sup>31</sup>P NMR spectra with description in the literature (Table S16). Spectra of crude hydroxy(4-methoxyphenyl)methylphosphonic acid (**5n**) was additionally re-measured with addition of D<sub>2</sub>SO<sub>4</sub>, in order to shift HOD signal overlapped on -C(PO<sub>3</sub>H<sub>2</sub>)H- (Figure S49 and Figure 50).

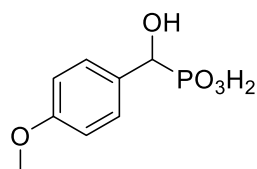

**Hydroxy(4-methoxyphenyl)methylphosphonic acid (5n).** <sup>31</sup>P NMR (D<sub>2</sub>O):  $\delta$  17.23 (d,  $^2J_{\text{H-P}} = 12.2$  Hz); <sup>1</sup>H NMR (D<sub>2</sub>O)  $\delta$ : 7.27 (dd, 2H,  $^3J_{\text{H-H}} = 8.9$  Hz,  $J = 1.8$  Hz), 6.83–6.86 (m, 2H), 3.69 (s, 3H).

**Table S16.** Comparison of chemical shifts and coupling constants on  $^1\text{H}$  and  $^{31}\text{P}$  NMR spectra of the reaction products of amino(4-methoxyphenyl)methylphosphonic acid (**1n**) with  $\text{NaNO}_2$  in water with description in the literature.

| Structure           | 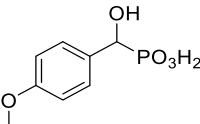 |                                              |                             |
|---------------------|------------------------------------------------------------------------------------|----------------------------------------------|-----------------------------|
|                     | ABr1226                                                                            | ABr1226                                      | Reference [17]              |
| Solvent             | $\text{D}_2\text{O}$                                                               | $\text{D}_2\text{O} + \text{D}_2\text{SO}_4$ | $\text{D}_2\text{O}$        |
| $^{31}\text{P}$ NMR | 17.23 (d, $J = 12.2$ Hz)                                                           | 20.90 (d, $J = 11.2$ Hz)                     | 20.8                        |
| $^1\text{H}$ NMR    | 7.27 (dd, 2H, $J = 8.9, 1.8$ Hz)                                                   | 6.78 (dd, 2H, $J = 8.8, 2.1$ Hz)             | 7.12 (d, 2H, $J = 8.0$ Hz)  |
|                     | 6.83–6.86 (m, 2H)                                                                  | 6.38 (d, 2H, $J = 8.6$ Hz)                   | 6.67 (d, 2H, $J = 8.0$ Hz)  |
|                     | Overlapped with HOD                                                                | 4.38 (d, 1H, $J = 11.6$ Hz)                  | 4.71 (d, 1H, $J = 12.0$ Hz) |
|                     | 3.69 (s, 3H)                                                                       | 3.19 (s, 3H)                                 | 3.44 (s, 3H)                |



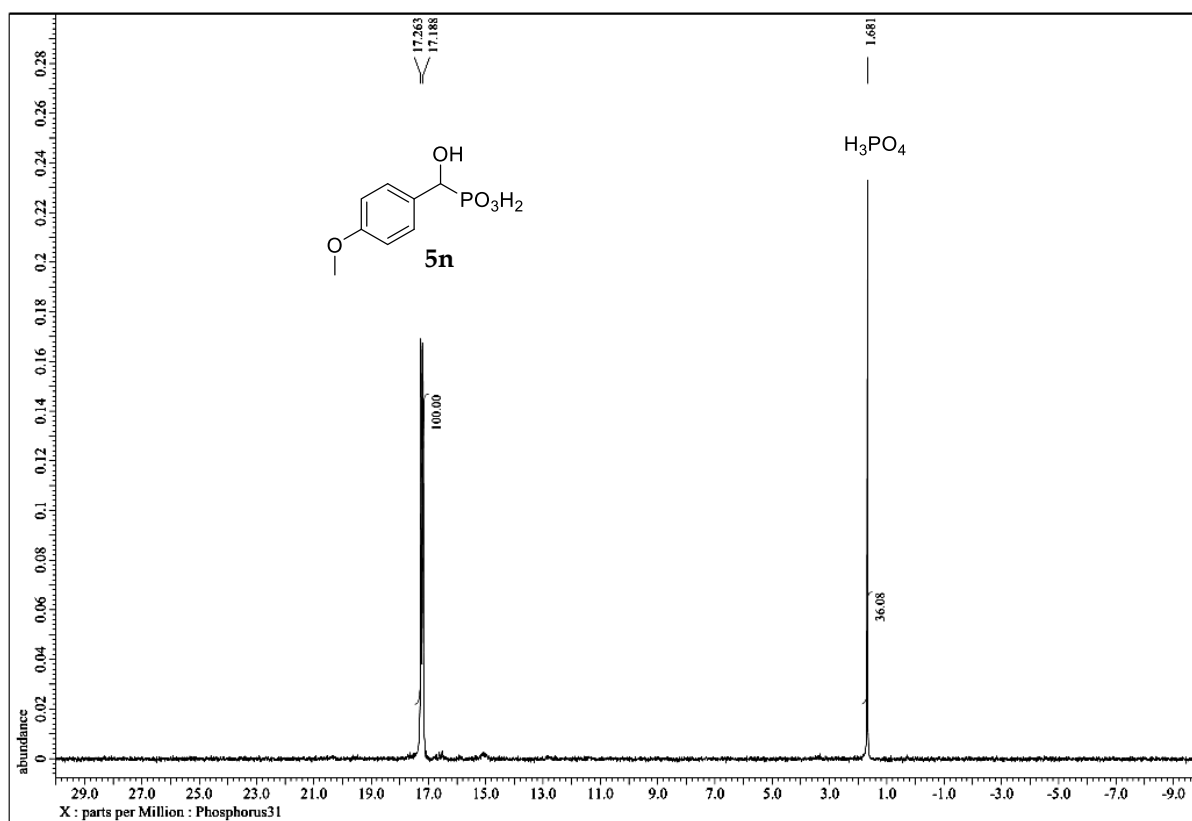

**Figure S47.**  $^{31}\text{P}$  NMR ( $\text{D}_2\text{O}$ , 162MHz) spectra of the crude post-reaction mixture of amino(4-methoxyphenyl)methylphosphonic acid (**1n**) with  $\text{NaNO}_2$  after 96h.

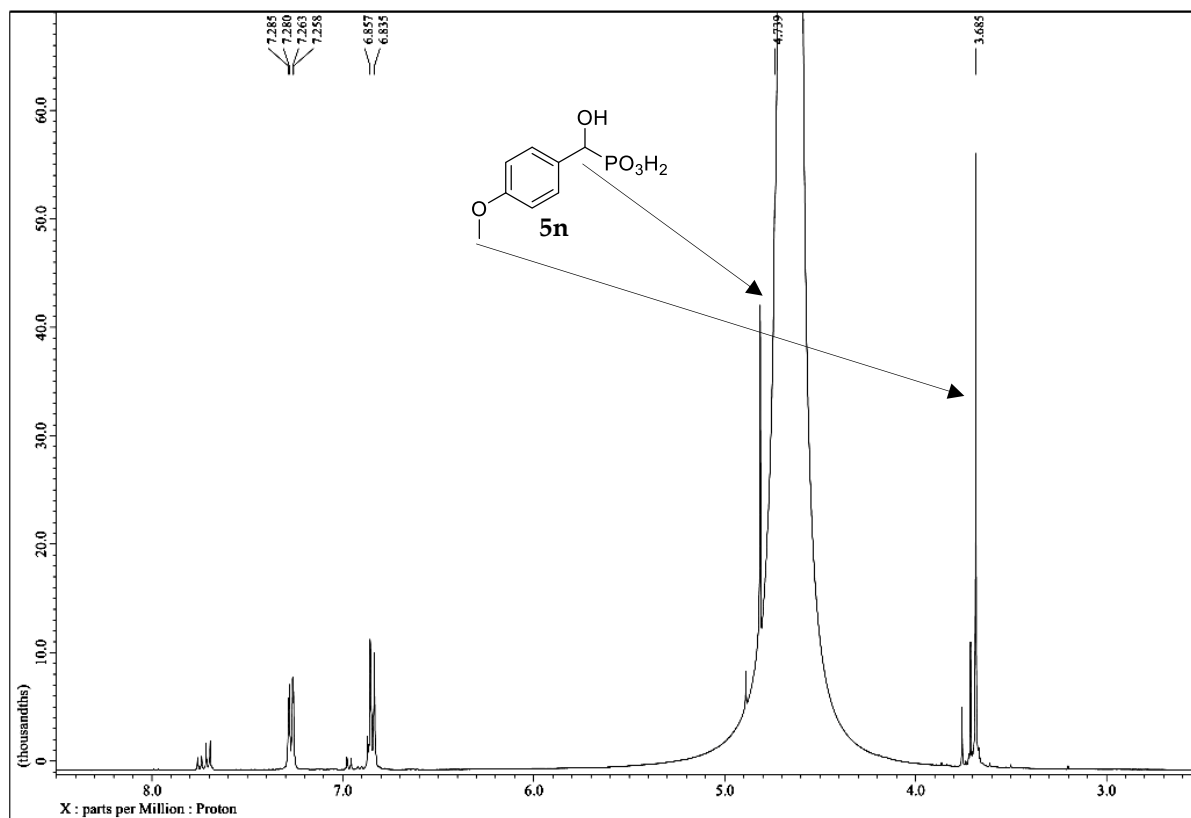

**Figure S48.**  $^1\text{H}$  NMR ( $\text{D}_2\text{O}$ , 162MHz) spectra of the crude post-reaction mixture of amino(4-methoxyphenyl)methylphosphonic acid (**1n**) with  $\text{NaNO}_2$  after 96h.

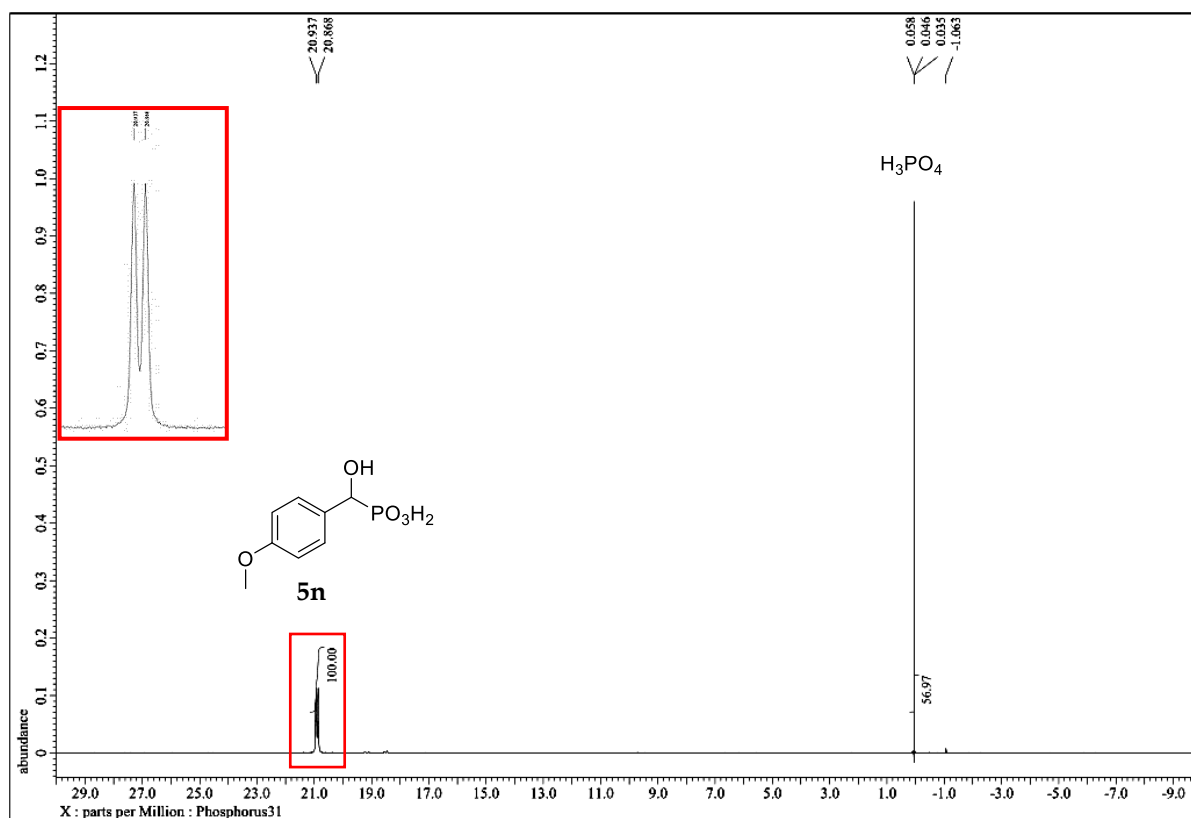

**Figure S49.**  $^{31}\text{P}$  NMR ( $\text{D}_2\text{O}$ , 162MHz) spectra of the crude post-reaction mixture of amino(4-methoxyphenyl)methylphosphonic acid (**1n**) with  $\text{NaNO}_2$  after 96h with addition of  $\text{D}_2\text{SO}_4$ .

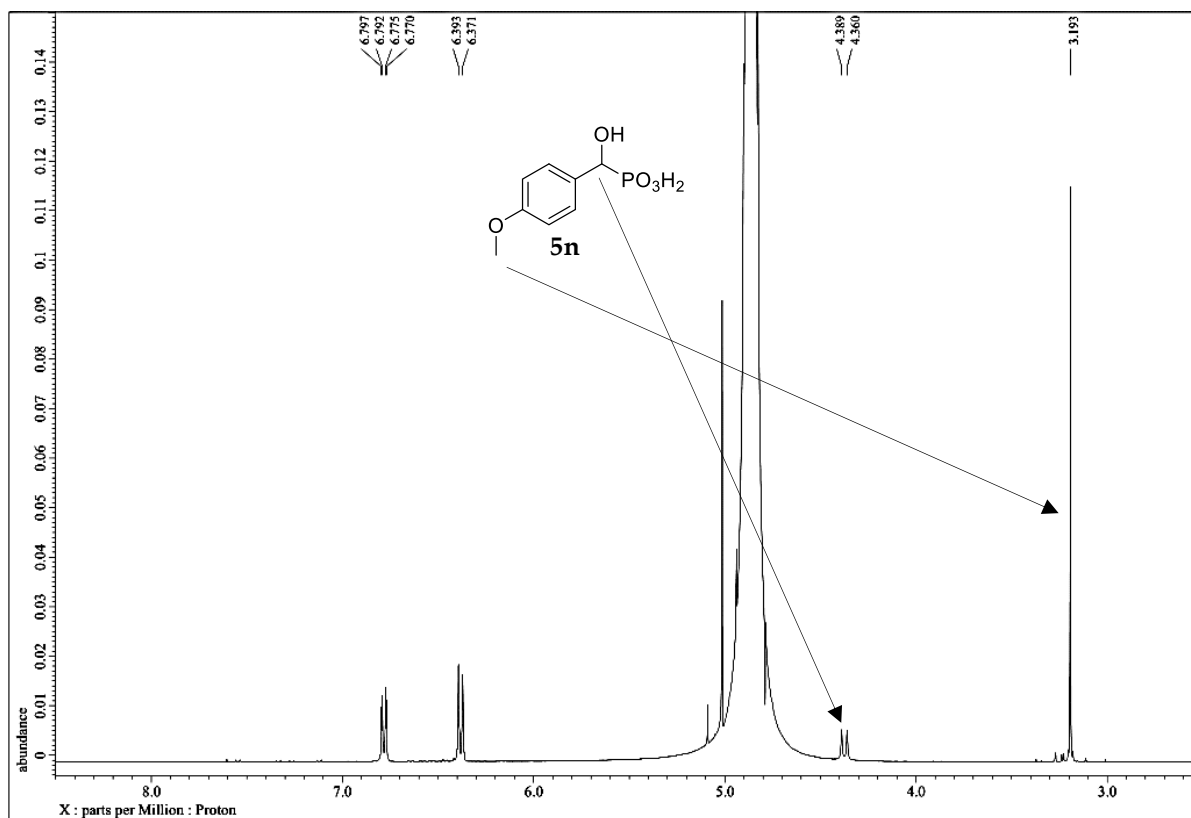

**Figure 50.**  $^1\text{H}$  NMR ( $\text{D}_2\text{O}$ , 400MHz) spectra of the crude post-reaction mixture of amino(4-methoxyphenyl)methylphosphonic acid (**1n**) with  $\text{NaNO}_2$  after 96h with addition of  $\text{D}_2\text{SO}_4$ .

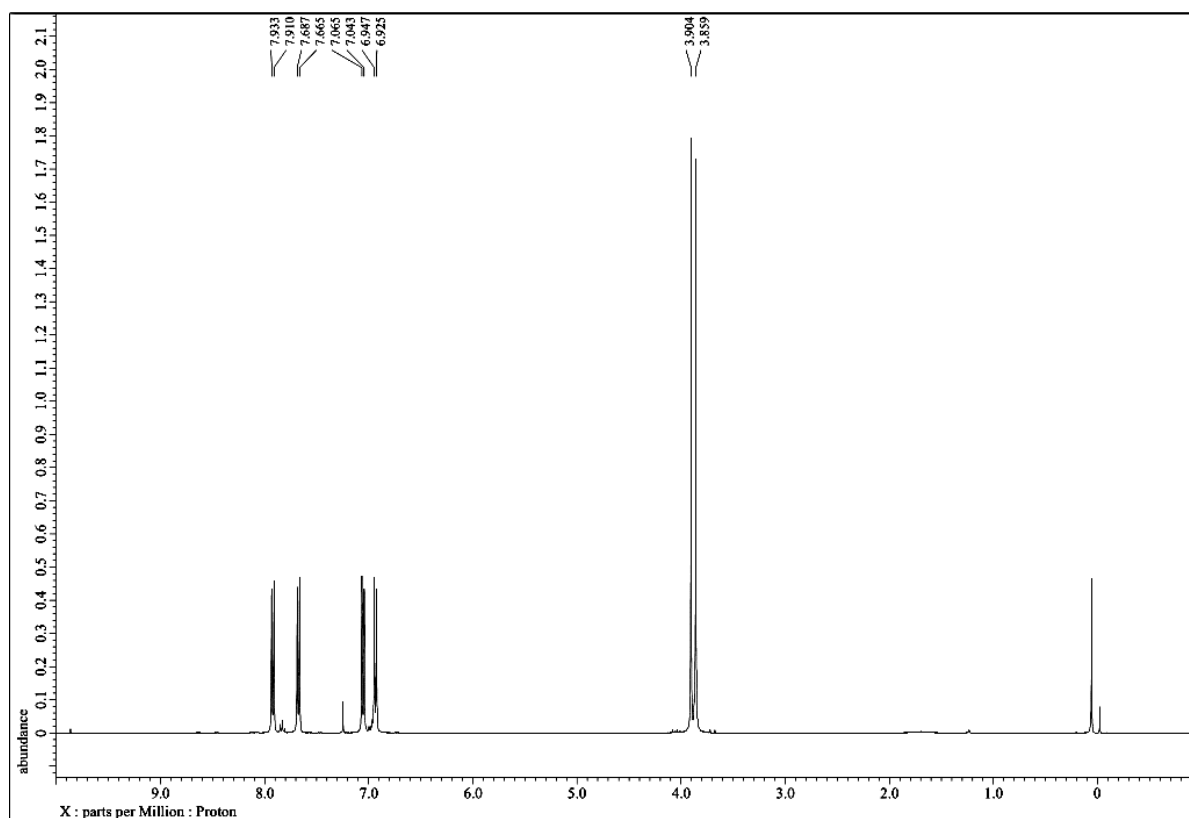

**Figure S51.** <sup>1</sup>H NMR (D<sub>2</sub>O, 400MHz) spectra of the side product of the reaction of amino(4-methoxyphenyl)methylphosphonic acid (**1n**) with NaNO<sub>2</sub>.

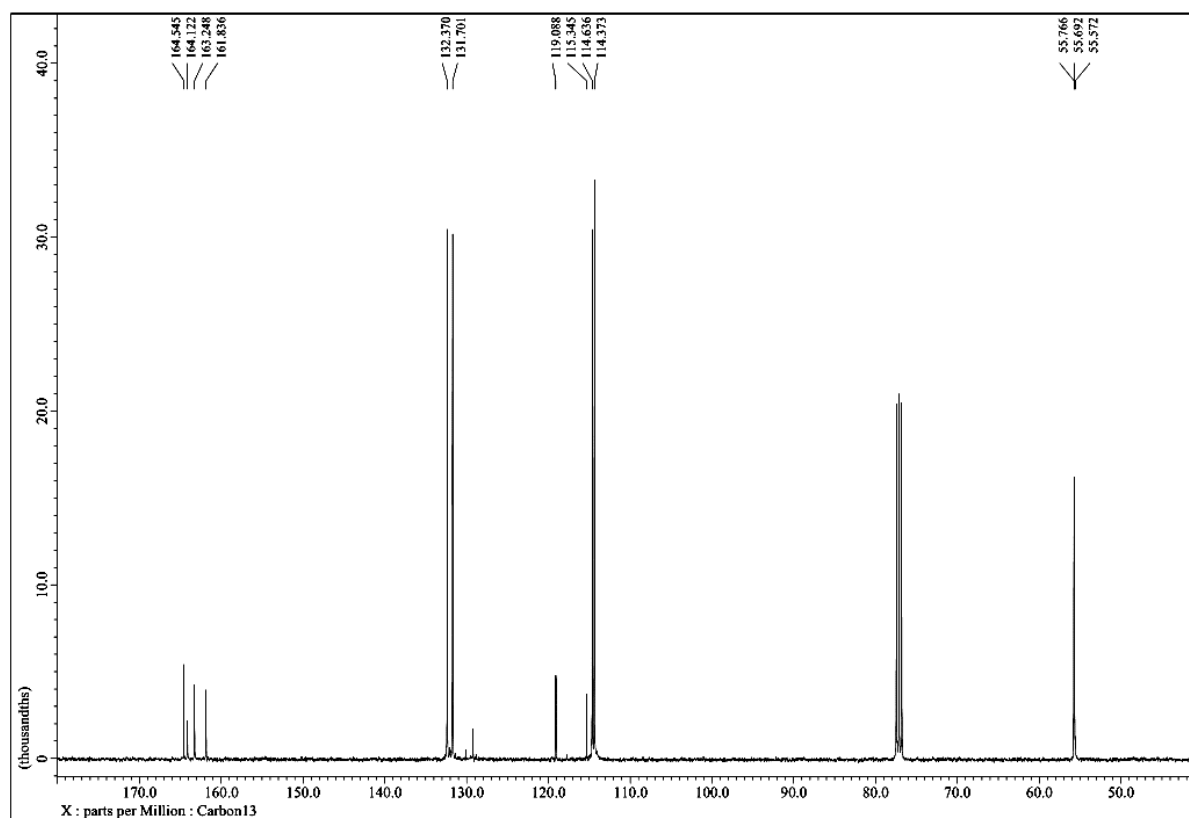

**Figure S52.** <sup>13</sup>C{<sup>1</sup>H} NMR (D<sub>2</sub>O, 100MHz) spectra of the side product of the reaction of amino(4-methoxyphenyl)methylphosphonic acid (**1n**) with NaNO<sub>2</sub>.

3.14. ABr1228. Deamination of **1h** in Water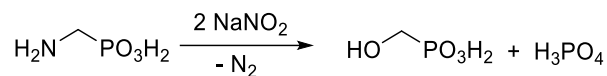

| <b>1h</b>                 |                 | <b>5h</b> |      |
|---------------------------|-----------------|-----------|------|
| 24 h                      | $\alpha = 1.00$ | 74%       | 9%   |
| $\delta_{\text{P}}$ [ppm] |                 | 18.50 (t) | 1.36 |

After 24 h at 21 °C, post-reaction mixture contained hydroxymethylphosphonic acid (**5h**) (74%molP), orthophosphoric acid (9%molP) and 8 unidentified compounds (17%molP in total) (Figure S60 and Figure S61).

Hydroxymethylphosphonic acid (**5h**) was identified by comparing chemical shifts, multiplicity and coupling constants on  $^1\text{H}$  and  $^{31}\text{P}$  NMR spectra with description in the literature (Table S18).

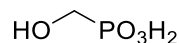

**Hydroxymethylphosphonic acid (5h).**  $^{31}\text{P}$  NMR ( $\text{D}_2\text{O}$ ):  $\delta$  18.50 (t,  $^2J_{\text{H-P}} = 7.5$  Hz);  $^1\text{H}$  NMR ( $\text{D}_2\text{O}$ )  $\delta$ : 3.53 (d, 2H,  $^2J_{\text{H-P}} = 7.4$  Hz).

**Table S18.** Comparison of chemical shifts and coupling constants on  $^1\text{H}$  and  $^{31}\text{P}$  NMR spectra of hydroxymethylphosphonic acid (**5h**) with description in the literature.

| Structure           | $\text{HO}-\text{CH}_2-\text{PO}_3\text{H}_2$ |                                 |
|---------------------|-----------------------------------------------|---------------------------------|
|                     | ABr1228                                       | Reference [18]                  |
| Solvent             | $\text{D}_2\text{O}$                          | $\text{D}_2\text{O}$ (pH = 6.8) |
| $^{31}\text{P}$ NMR | 18.50 (t, $J = 7.5$ Hz)                       | 17.5 ( $J = 7.9$ Hz)            |

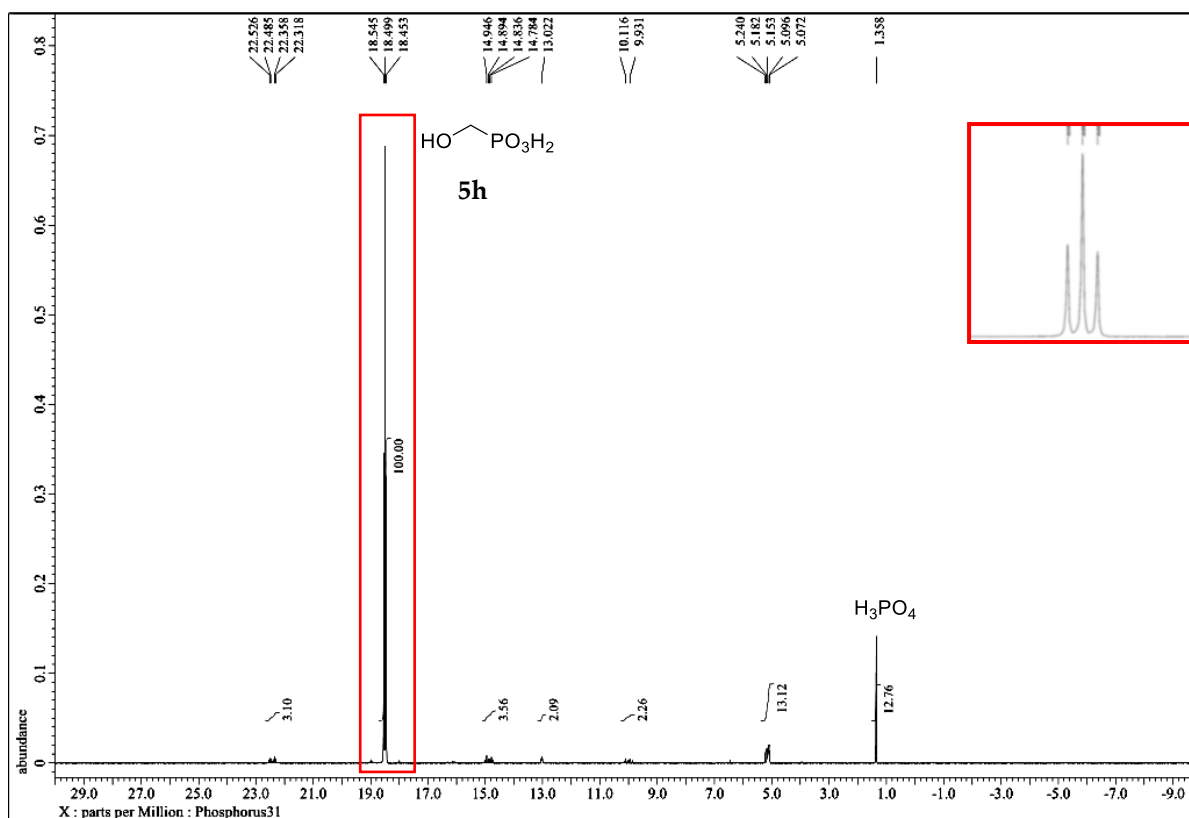

**Figure S60.**  $^{31}\text{P}$  NMR ( $\text{D}_2\text{O}$ , 162MHz) spectra of the crude post-reaction mixture of laminomethylphosphonic acid (**1h**) with  $\text{NaNO}_2$  after 24 h.

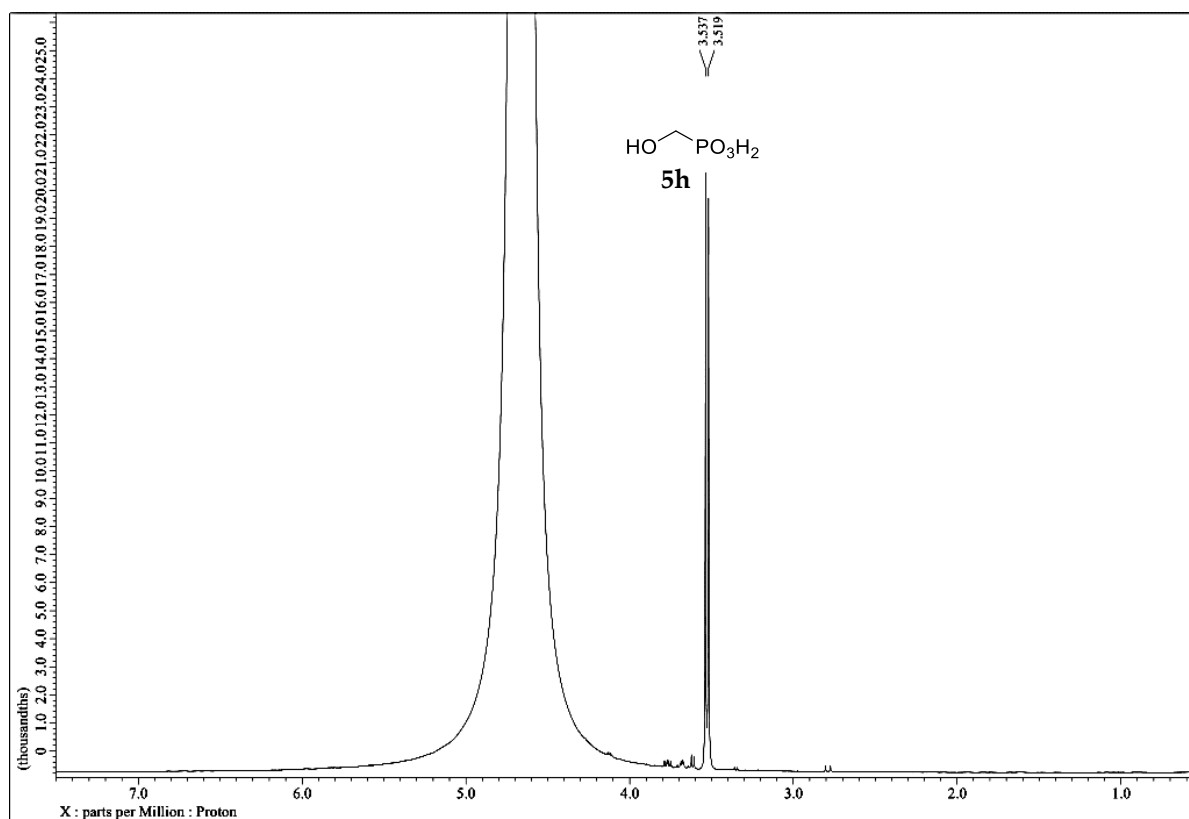

**Figure S61.**  $^1\text{H}$  NMR ( $\text{D}_2\text{O}$ , 400MHz) spectra of the crude post-reaction mixture of laminomethylphosphonic acid (**1h**) with  $\text{NaNO}_2$  after 24 h.

3.15. ABr1234. Deamination of **1p** in Water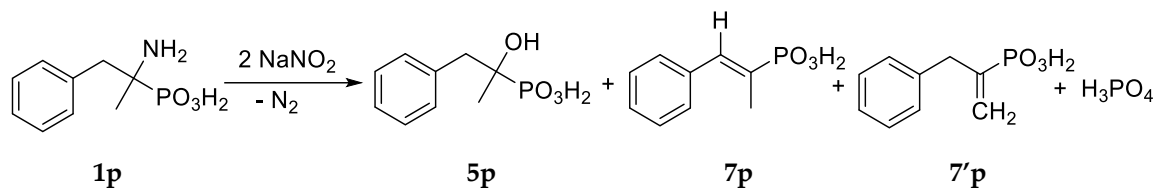

|                           |                 |            |            |             |      |
|---------------------------|-----------------|------------|------------|-------------|------|
| 96h                       | $\alpha = 1.00$ | 66%        | 22%        | 9%          | 3%   |
| $\delta_{\text{P}}$ [ppm] |                 | 23.47 (dq) | 16.91 (dq) | 14.53 (ddt) | 1.10 |

After 96h at 21 °C, post-reaction mixture contained 1-hydroxy-1-methyl-2-phenylethylphosphonic acid (**5p**) (66%molP), (*E*)-3-phenyl-prop-2-en-2-ylphosphonic acid (22%molP) (**7p**), 3-phenyl-prop-1-en-2-ylphosphonic acid (**7'p**) (9%molP) and orthophosphoric acid (3%molP) (Figure S62 and Figure S63).

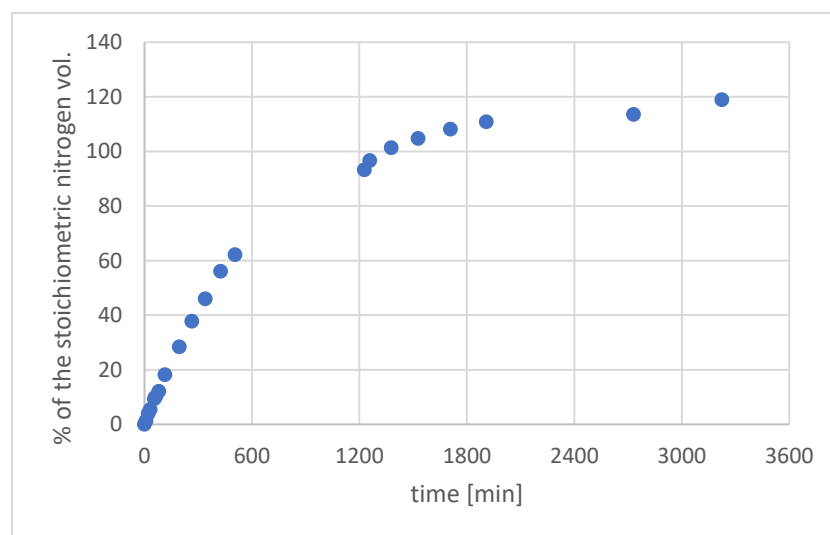

**Chart 13.** Dependence of the volume of the released gas (in % of the stoichiometric nitrogen volume) on the time in the reaction of 1-amino-1-methyl-2-phenylethylphosphonic acid (**1p**) with  $\text{NaNO}_2$  in water.

(*E*)-3-Phenyl-prop-2-en-2-ylphosphonic acid (**7p**) was identified by comparing chemical shifts, multiplicity and coupling constants on  $^1\text{H}$  and  $^{31}\text{P}$  NMR spectra with description of structurally similar (*E*)-1-methylprop-1-en-1-ylphosphonic acid (**7i**), which was obtained in the reaction of 1-amino-1-methylpropylphosphonic acid (**1i**) with  $\text{NaNO}_2$  (ABr1214) (Table S19). 1-Hydroxy-1-methyl-2-phenylethylphosphonic acid (**5p**) and 3-phenyl-prop-1-en-2-ylphosphonic acid (**7'p**) were identified by comparing chemical shifts, multiplicity and coupling constants on  $^1\text{H}$  and  $^{31}\text{P}$  NMR spectra with description of structurally similar compounds: 1-hydroxy-1-methylethylphosphonic acid (**5m**) and 1-methylvinylphosphonic acid (**7m**), which were obtained in the reaction of 1-amino-1-methylethylphosphonic acid (**1m**) with  $\text{NaNO}_2$  (ABr1204) (Table S20).

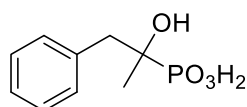

**1-Hydroxy-1-methyl-2-phenylethylphosphonic acid (5p).**  $^{31}\text{P}$  NMR ( $\text{D}_2\text{O}$ ):  $\delta$  23.47 (ddq,  $^3J_{\text{H-P}} = 14.0$  Hz,  $^3J_{\text{H-P}} = 7.7$  Hz,  $^3J_{\text{H-P}} = 3.7$  Hz);  $^1\text{H}$  NMR ( $\text{D}_2\text{O}$ )  $\delta$ : 7.13–7.34 (m, 5H), 2.97 (dd, 1H,  $^2J_{\text{H-H}} = 13.8$  Hz,  $^3J_{\text{H-P}} = 7.6$  Hz), 2.79 (dd, 1H,  $^2J_{\text{H-H}} = 13.8$  Hz,  $^3J_{\text{H-P}} = 4.0$  Hz), 1.03 (d, 3H,  $^3J_{\text{H-P}} = 14.4$  Hz).

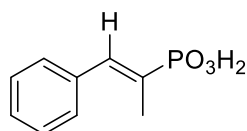

**(E)-3-Phenyl-prop-2-en-2-ylphosphonic acid (7p).**  $^{31}\text{P}$  NMR ( $\text{D}_2\text{O}$ ):  $\delta$  16.91 (dq,  $^3J_{\text{H-P}} = 22.9$  Hz,  $^3J_{\text{H-H}} = 1.5$  Hz);  $^1\text{H}$  NMR ( $\text{D}_2\text{O}$ ):  $\delta$ : 7.13–7.34 (m, 5H), 7.03 (dq, 1H,  $^3J_{\text{H-P}} = 22.9$  Hz,  $^4J_{\text{H-H}} = 1.5$  Hz), 1.90 (dd, 3H,  $^3J_{\text{H-P}} = 14.2$  Hz,  $^4J_{\text{H-H}} = 1.5$  Hz).

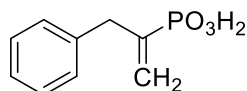

**3-Phenyl-prop-1-en-2-ylphosphonic acid (7'p).**  $^{31}\text{P}$  NMR ( $\text{D}_2\text{O}$ ):  $\delta$  14.53 (ddt,  $^3J_{\text{H-P(trans)}} = 43.9$  Hz,  $^3J_{\text{H-P(cis)}} = 20.6$  Hz,  $^3J_{\text{H-P}} = 9.4$  Hz);  $^1\text{H}$  NMR ( $\text{D}_2\text{O}$ ):  $\delta$ : 7.13–7.34 (m, 5H), 5.64 (ddt, 1H,  $^3J_{\text{H-P(cis)}} = 20.5$  Hz,  $^4J_{\text{H-H}} = 1.5$  Hz,  $^4J_{\text{H-H}} = 1.2$  Hz), 5.07 (ddt, 1H,  $^3J_{\text{H-P(trans)}} = 43.3$  Hz,  $^4J_{\text{H-H}} = 1.8$  Hz,  $^4J_{\text{H-H}} = 1.5$  Hz), 3.43 (ddd, 2H,  $^3J_{\text{H-P}} = 9.8$  Hz,  $J$  undetermined).

**Table S19.** Comparison of chemical shifts and coupling constants on  $^1\text{H}$  and  $^{31}\text{P}$  NMR spectra of (*E*)-3-phenyl-prop-2-en-2-ylphosphonic acid (**7p**) and (*E*)-1-methylprop-1-en-1-ylphosphonic acid (**7i**) (ABr1214).

| Structure           |                                   |                                         |
|---------------------|-----------------------------------|-----------------------------------------|
| Source              | ABr1234                           | ABr1214                                 |
| Solvent             | $\text{D}_2\text{O}$              | $\text{D}_2\text{O}$                    |
| $^{31}\text{P}$ NMR | 16.91 (dq, $J = 22.9, 14.0$ Hz)   | 17.47 (dq, $J = 21.7, 13.6, 3.7$ Hz)    |
| $^1\text{H}$ NMR    | 7.13–7.34 (m, 5H)                 |                                         |
|                     | 7.03 (dq, 1H, $J = 22.9, 1.5$ Hz) | 6.15 (ddq, 1H, $J = 21.7, 6.7, 1.5$ Hz) |
|                     | 1.90 (dd, 3H, $J = 14.2, 1.5$ Hz) | 1.63 (ddq, 3H, $J = 13.6, 1.2, 1.2$ Hz) |
|                     |                                   | 1.57 (ddq, 3H, $J = 6.7, 3.7, 1.2$ Hz)  |

**Table S20.** Comparison of chemical shifts and coupling constants on  $^1\text{H}$  and  $^{31}\text{P}$  NMR spectra of post-reaction mixture of 1-amino-2-phenyl-1-methylethylphosphonic acid (**1p**) with  $\text{NaNO}_2$  and 1-hydroxy-1-methylethylphosphonic acid (**5m**) and 1-methylvinylphosphonic acid (**7m**).

| Structure           |                                      |                               |                                            |                                         |
|---------------------|--------------------------------------|-------------------------------|--------------------------------------------|-----------------------------------------|
| Source              | ABr1234                              | ABr1204                       | ABr1234                                    | ABr1204                                 |
| Solvent             | $\text{D}_2\text{O}$                 | $\text{D}_2\text{O}$          | $\text{D}_2\text{O}$                       | $\text{D}_2\text{O}$                    |
| $^{31}\text{P}$ NMR | 23.47 (ddq, $J = 14.0, 7.7, 3.7$ Hz) | 23.84 (septet, $J = 14.0$ Hz) | 14.53 (ddt, $J = 43.9, 20.6, 9.4$ Hz)      | 15.21 (ddq, $J = 43.9, 20.6, 13.1$ Hz)  |
| $^1\text{H}$ NMR    | 7.13–7.34 (m, 5H)                    |                               | 7.13–7.34 (m, 5H)                          |                                         |
|                     | 2.97 (dd, 1H, $J = 13.8, 7.6$ Hz)    |                               | 5.64 (ddt, 1H, $J = 20.5, 1.5, 1.2$ Hz)    | 5.46 (ddq, 1H, $J = 20.3, 2.1, 1.2$ Hz) |
|                     | 2.79 (dd, 1H, $J = 13.8, 4.0$ Hz)    |                               | 5.07 (ddt, 1H, $J = 43.3, 1.8, 1.5$ Hz)    | 5.36 (tq, 1H, $J = 43.4, 1.8$ Hz)       |
|                     | 1.03 (d, 3H, $J = 14.4$ Hz)          | 1.23 (d, 6H, $J = 13.8$ Hz)   | 3.43 (ddd, $J = 9.8$ Hz, $J$ undetermined) |                                         |
|                     |                                      |                               |                                            | 1.77 (dt, 3H, $J = 13.1, 1.2$ Hz)       |

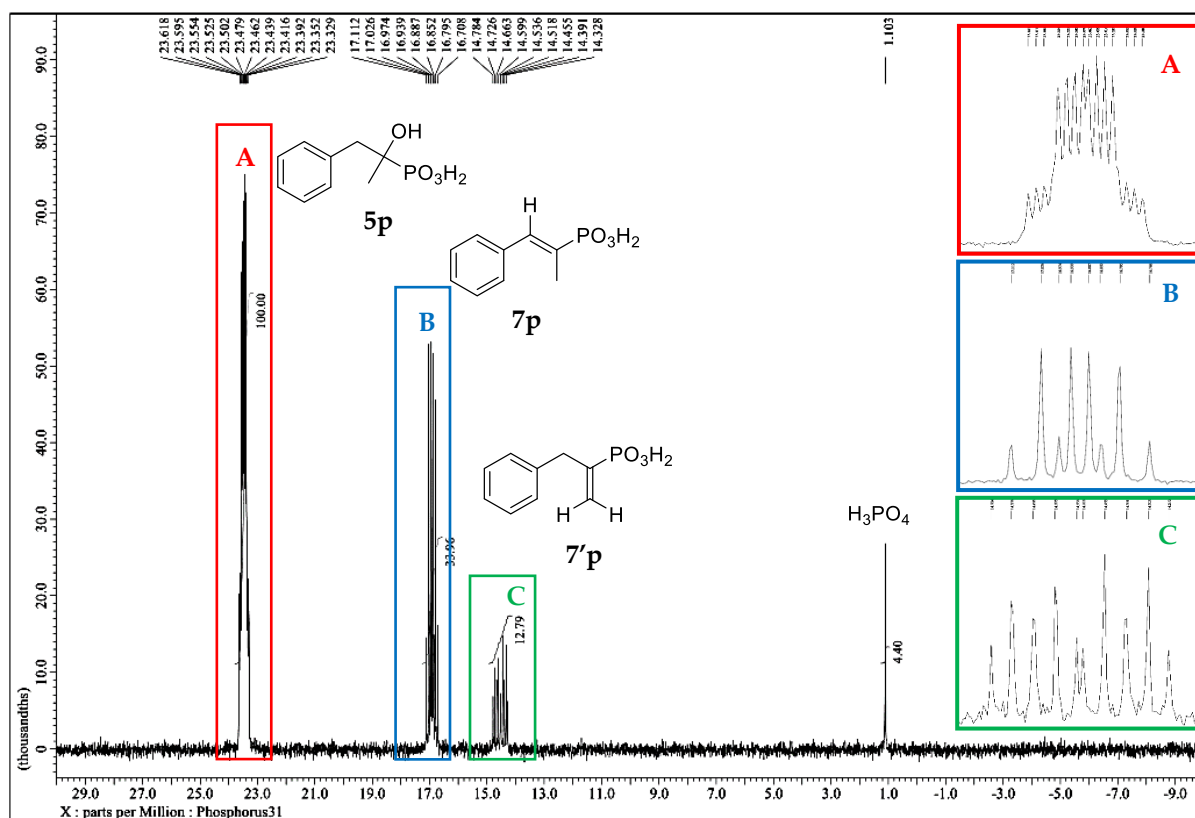

Figure S62.  $^{31}\text{P}$  NMR (D<sub>2</sub>O, 162 MHz) spectra of the crude post-reaction mixture of 1-amino-1-methyl-2-phenylethylphosphonic acid (**1p**) with NaNO<sub>2</sub> after 96h.

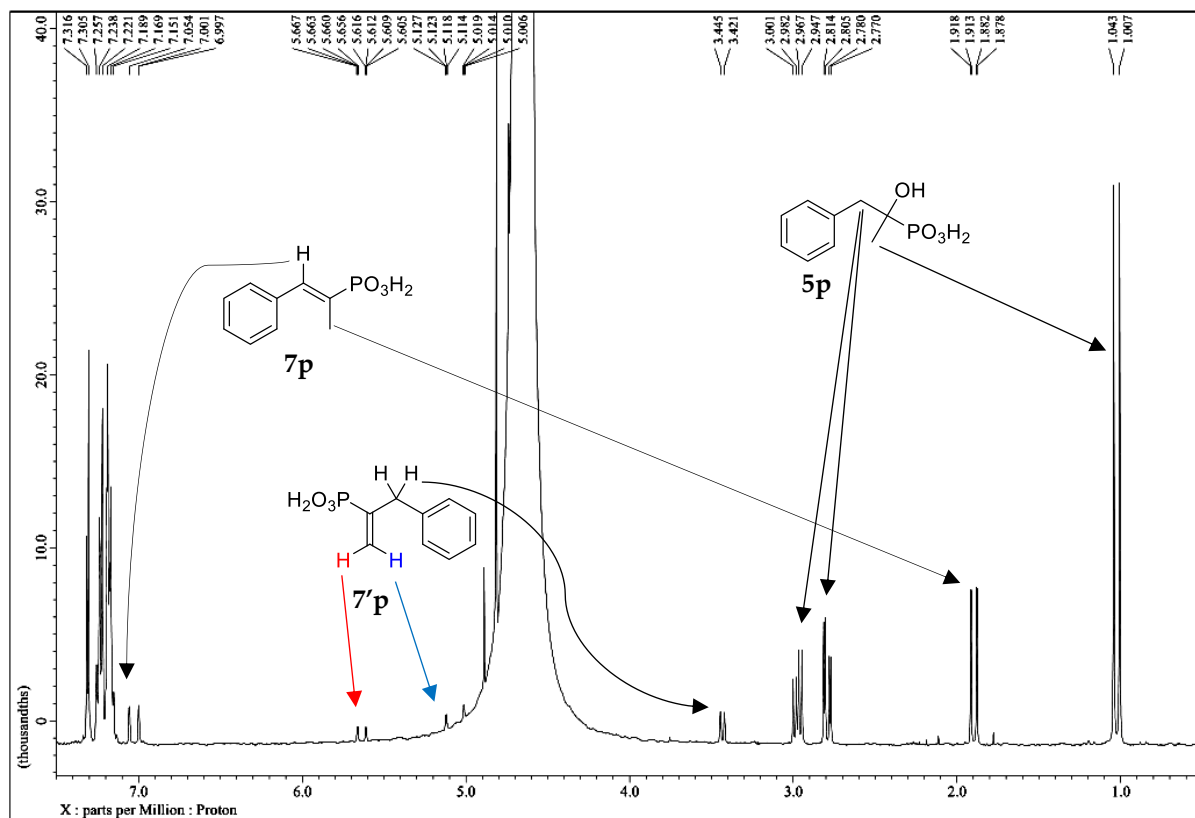

Figure S63.  $^1\text{H}$  NMR (D<sub>2</sub>O, 400 MHz) spectra of the crude post-reaction mixture of 1-amino-1-methyl-2-phenylethylphosphonic acid (**1p**) with NaNO<sub>2</sub> after 96h.



3.16. ABr1236. Deamination of **1g** in Water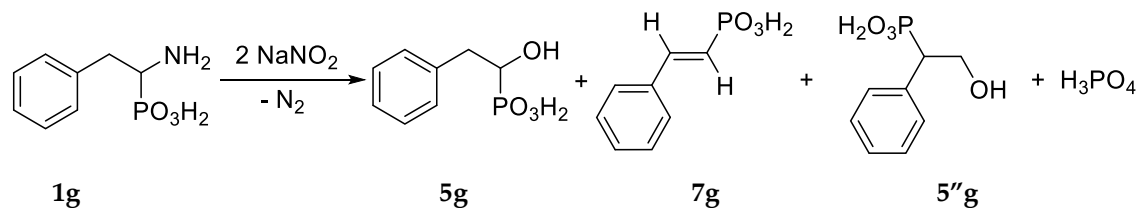

|                  |                 |             |           |             |      |
|------------------|-----------------|-------------|-----------|-------------|------|
| 48h              | $\alpha = 0.99$ | 43%         | 3%        | 21%         | 25%  |
| 360h             | $\alpha = 1.00$ | 42%         | 3%        | 21%         | 29%  |
| $\delta_F$ [ppm] | 14.5            | 19.59 (ddd) | 13.37 (t) | 18.96 (ddd) | 1.58 |

After 48h at 21 °C, post-reaction mixture contained 1-hydroxy-2-phenylethylphosphonic acid (**5g**) (44%molP), (*E*)-2-phenylvinylphosphonic acid (**7g**) (3%molP), 2-hydroxy-1-phenylethylphosphonic acid (**5''g**) (21%molP), orthophosphoric acid (26%molP), unreacted substrate **1g** (1%molP) and unidentified compounds (5%molP in total).

After 360h at 21 °C, post-reaction mixture contained 1-hydroxy-2-phenylethylphosphonic acid (**5g**) (46%molP), (*E*)-2-phenylvinylphosphonic acid (**7g**) (3%molP), 2-hydroxy-1-phenylethylphosphonic acid (23%molP) (**5''g**), orthophosphoric acid (23%molP) and unidentified compounds (5%molP in total) (Figure S66 and Figure S66).

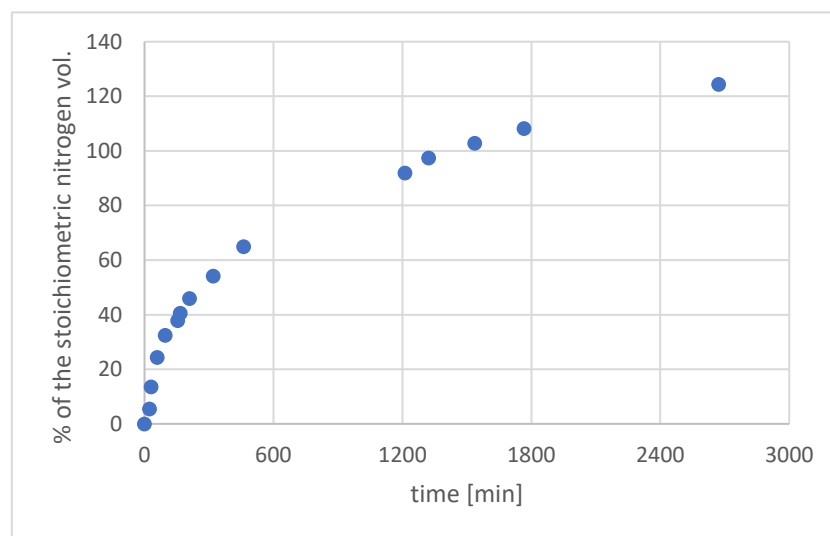

**Chart 14.** Dependence of the volume of the released gas (in % of the stoichiometric nitrogen volume) on the time in the reaction of 1-amino-2-phenylethylphosphonic acid (**1g**) with  $\text{NaNO}_2$  in water.

1-Hydroxy-2-phenylethylphosphonic acid (**5g**) and (*E*)-2-phenylvinylphosphonic acid (**7g**) were identified by comparing chemical shifts, multiplicity and coupling constants on  $^1\text{H}$  and  $^{31}\text{P}$  NMR spectra with description in the literature (Table S21).

In the reaction 3 hydroxyalkylphosphonic acid could be formed (Figure S64): 1-hydroxy-2-phenylethylphosphonic acid (**7g**) (product of nucleophile addition), 2-hydroxy-2-phenylethylphosphonic acid (**5'g**) (product of rearrangement and nucleophile addition) and 2-hydroxy-1-phenylethylphosphonic acid (**5''g**) (product of phenyl migration and nucleophile addition).

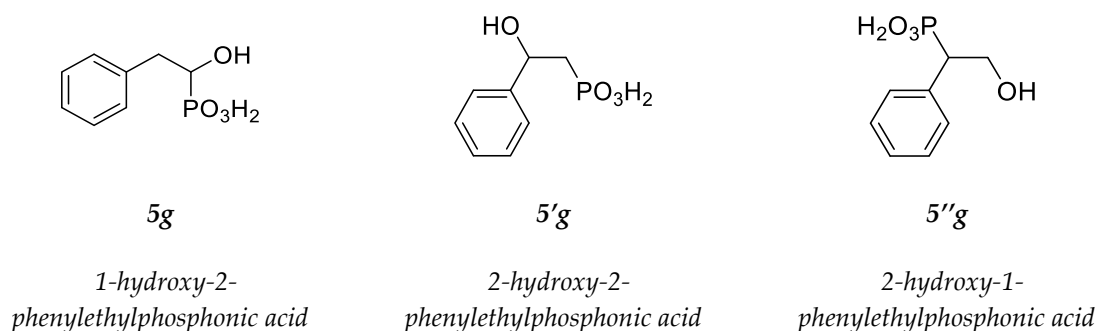

**Figure S64.** Structures of plausible products of reaction of 1-amino-2-phenylethylphosphonic acid (**1g**) with  $\text{NaNO}_2$  in water.

Identification of reaction products was accomplished by analysis of  $^{13}\text{C}\{^1\text{H}\}$  NMR spectra (Figure S67) and DEPT-135 spectra (Figure S68): in the post-reaction mixture there were 2 compounds that have structure  $-\text{CH}_2\text{CH}(\text{PO}_3\text{H}_2)-$ . The comparison of  $^{13}\text{C}\{^1\text{H}\}$  NMR spectra of post-reaction mixture with description in the literature confirms that the main reaction product was 1-hydroxy-2-phenylethylphosphonic acid (**5g**) [ $\delta$ : 70.77 (d,  $J = 152.8$  Hz), 38.01]. Therefore, 2-hydroxy-1-phenylethylphosphonic acid (**5''g**) has to be the second reaction product [ $\delta$ : 62.25, 50.11 (d,  $J = 124.1$  Hz)]. Additionally, the NMR spectra description [19] of 2-hydroxy-2-phenylethylphosphonic acid (**5'g**) excludes possibility that this compound was present in the post-reaction mixture.

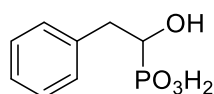

**1-Hydroxy-2-phenylethylphosphonic acid (5g).**  $^{31}\text{P}$  NMR ( $\text{D}_2\text{O}$ ):  $\delta$  19.59 (br d,  $J_{\text{H-P}} = 2.8$  Hz);  $^1\text{H}$  NMR ( $\text{D}_2\text{O}$ , 600MHz)  $\delta$ : 7.14–7.32 (m, 5H), 3.79 (ddd, 1H,  $^2J_{\text{H-P}} = 11.5$  Hz,  $^3J_{\text{H-H}} = 7.8$  Hz,  $^3J_{\text{H-H}} = 2.5$  Hz), 3.03 (ddd, 1H,  $^2J_{\text{H-H}} = 14.3$  Hz,  $^3J_{\text{H-P}} = 2.5$  Hz,  $^3J_{\text{H-H}} = 2.5$  Hz), 2.64 (ddd, 1H,  $^2J_{\text{H-H}} = 14.3$  Hz,  $^3J_{\text{H-P}} = 11.9$  Hz,  $^3J_{\text{H-H}} = 7.3$  Hz).  $^{13}\text{C}\{^1\text{H}\}$  NMR (62mg,  $\text{D}_2\text{O}$ )  $\delta$ : 70.77 (d,  $J_{\text{C-P}} = 152.8$  Hz), 38.01.

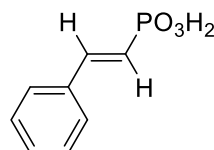

**(E)-2-Phenylvinylphosphonic acid (7g).**  $^{31}\text{P}$  NMR ( $\text{D}_2\text{O}$ ):  $\delta$  13.38 (m);  $^1\text{H}$  NMR ( $\text{D}_2\text{O}$ )  $\delta$ : 7.14–7.32 (m, 5H), 7.04 (dd, 1H,  $J_{\text{H-P}} = 20.8$  Hz,  $^3J_{\text{H-H}} = 17.4$  Hz), 6.37 (dd, 1H,  $^3J_{\text{H-H}} = 17.4$  Hz,  $J_{\text{H-P}} = 16.0$  Hz).

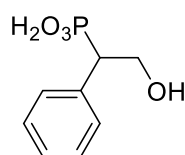

**2-Hydroxy-1-phenylethylphosphonic acid (5''g).**  $^{31}\text{P}$  NMR ( $\text{D}_2\text{O}$ ):  $\delta$  18.96 (br d  $^2J_{\text{H-P}} = 21.5$  Hz);  $^1\text{H}$  NMR ( $\text{D}_2\text{O}$ )  $\delta$ : 7.14–7.32 (m, 5H), 4.07 (dt,  $^2J_{\text{H-H}} = 11.3$  Hz,  $^3J_{\text{H-P}} = 4.3$  Hz,  $^3J_{\text{H-H}} = 4.3$  Hz), 3.96 (dt, 1H,  $^2J_{\text{H-H}} = 11.3$  Hz,  $^3J_{\text{H-P}} = 5.2$  Hz,  $^3J_{\text{H-H}} = 5.2$  Hz), 3.07 (ddd, 1H,  $^2J_{\text{H-P}} = 22.0$  Hz,  $^3J_{\text{H-H}} = 11.0$  Hz,  $^3J_{\text{H-H}} = 4.3$  Hz).  $^{13}\text{C}\{^1\text{H}\}$  NMR (62mg,  $\text{D}_2\text{O}$ )  $\delta$ : 62.25, 50.11 (d,  $J_{\text{C-P}} = 124.1$  Hz).

**Table S21.** Comparison of chemical shifts and coupling constants on  $^1\text{H}$  and  $^{31}\text{P}$  NMR spectra of post-reaction mixture of 1-amino-2-phenylethylphosphonic acid (**1g**) with  $\text{NaNO}_2$  with description in the literature.

| Structure           | 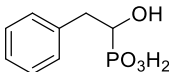 |  |                                         |                                                |
|---------------------|-----------------------------------------------------------------------------------|-------------------------------------------------------------------------------------|-----------------------------------------|------------------------------------------------|
| Source              | ABr1236                                                                           | Reference [20]                                                                      | ABr1236                                 | Reference [21]                                 |
| Solvent             | D2O                                                                               | D2O                                                                                 | D2O                                     | DMSO-d6                                        |
| <sup>31</sup> P NMR | 19.59 (ddd, <i>J</i> = 2.8 Hz)                                                    | 18.22 (m, <i>J</i> = 6.9 Hz)                                                        | 13.38 (dd, <i>J</i> = 19.6, 15.9 Hz);   | 14.71                                          |
| <sup>1</sup> H NMR  | 7.14-7.32 (m, 5H)                                                                 | <div>7.27-7.30 (4H, m)</div> <div>7.22-7.27 (m, 1H)</div>                           | 7.14-7.32 (m, 5H)                       | <div>7.6 (m, 2H)</div> <div>7.4 (m, 3H),</div> |
|                     | 3.85 (ddd, 1H, <i>J</i> = 11.7, 7.7, 2.4 Hz)                                      | 3.77 (ddd, 1H, <i>J</i> = 7.5, 3.1, 9.6 Hz)                                         | 7.04 (dd, 1H, <i>J</i> = 20.8, 17.4 Hz) | 7.2 (dd, 1H, <i>J</i> = 17.7, 17.4 Hz)         |
|                     | 3.10 (dt, 1H, <i>J</i> = 13.9, 2.7 Hz)                                            | 3.07 (ddd, 1H, <i>J</i> = 14.4, 3.1, 3.4 Hz)                                        | 6.36 (dd, 1H, <i>J</i> = 17.4, 16.0 Hz) | 6.5 (dd, 1H, <i>J</i> = 18.0, 16.2 Hz)         |
|                     | 2.70 (ddd, 1H, <i>J</i> = 14.3, 11.9, 7.3 Hz)                                     | 2.66 (ddd, 1H, <i>J</i> = 14.4, 9.6, 7.8 Hz).                                       |                                         |                                                |
|                     |                                                                                   |                                                                                     |                                         |                                                |

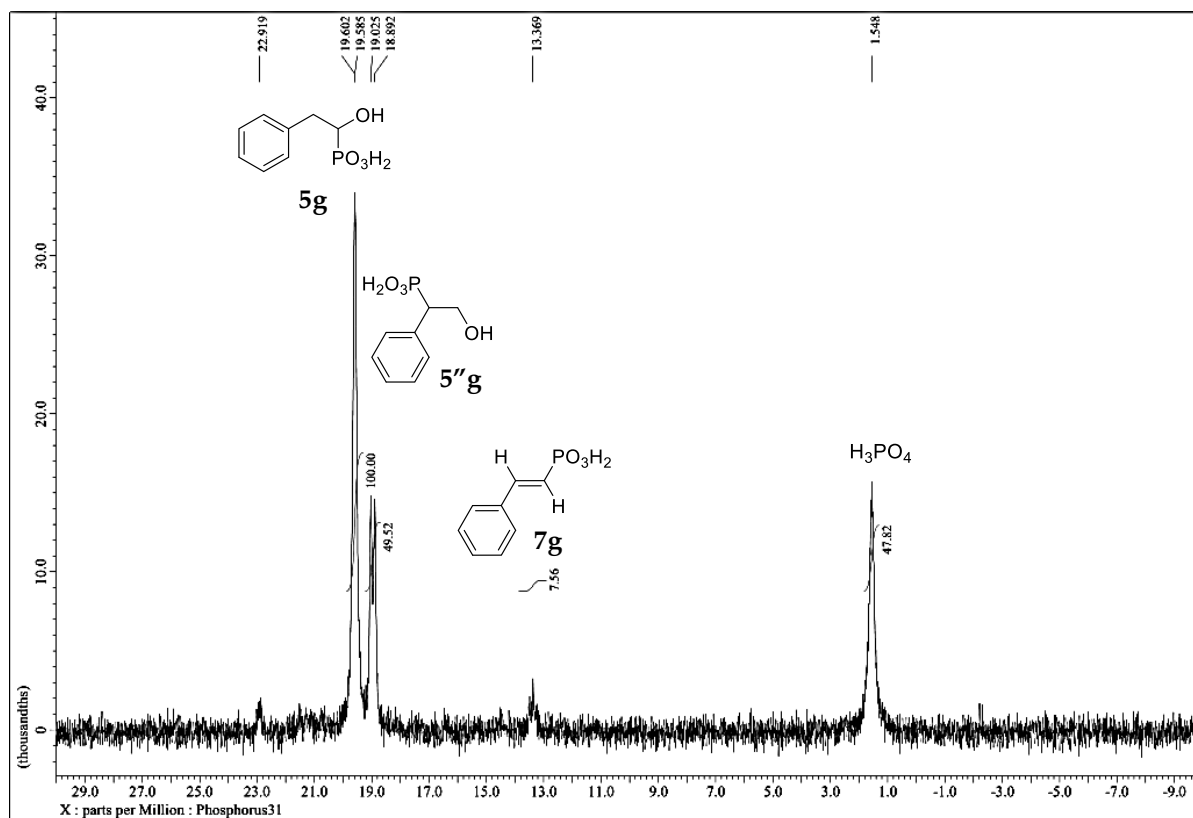

**Figure S65.** <sup>31</sup>P NMR (D<sub>2</sub>O, 162MHz) spectra of the crude post-reaction mixture of 1-amino-2-phenylethylphosphonic acid (**1g**) with NaNO<sub>2</sub> after 360h.

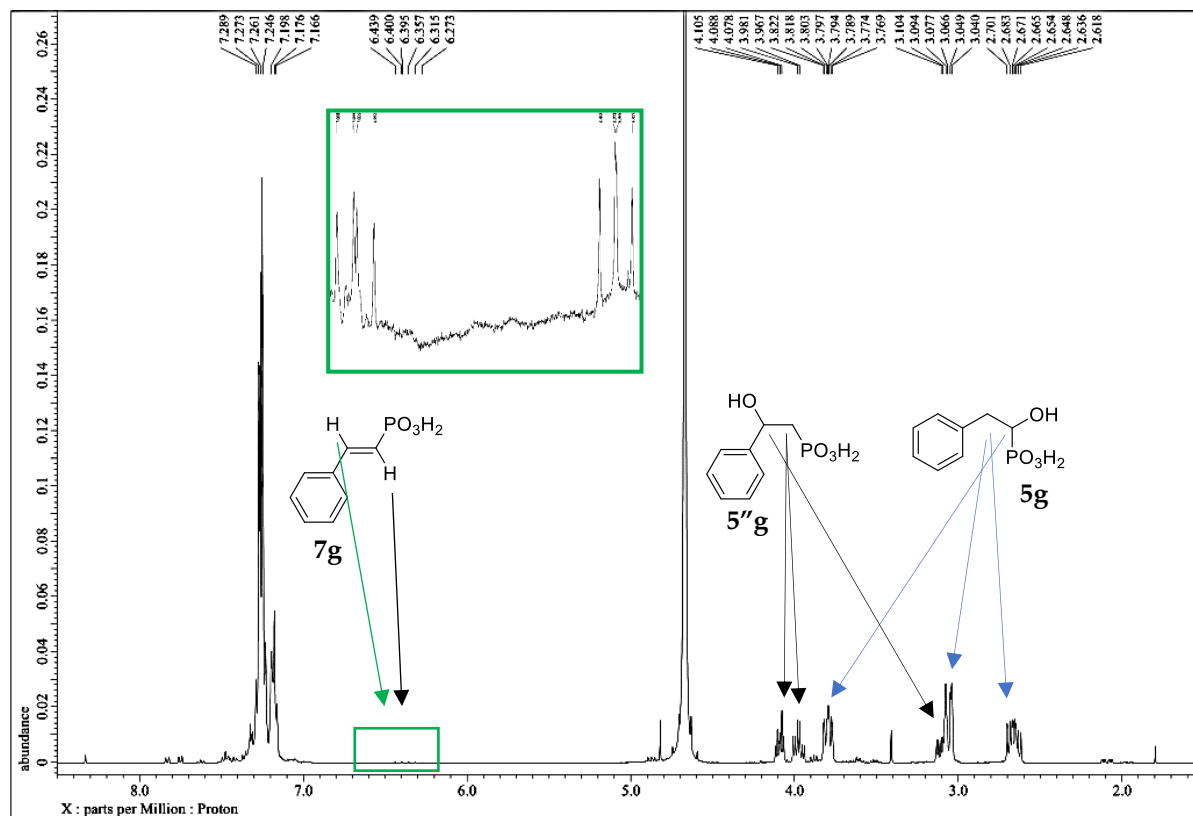

**Figure S66.** <sup>1</sup>H NMR (D<sub>2</sub>O, 400MHz) spectra of the crude post-reaction mixture of 1-amino-2-phenylethylphosphonic acid (**1g**) with NaNO<sub>2</sub> after 360h.

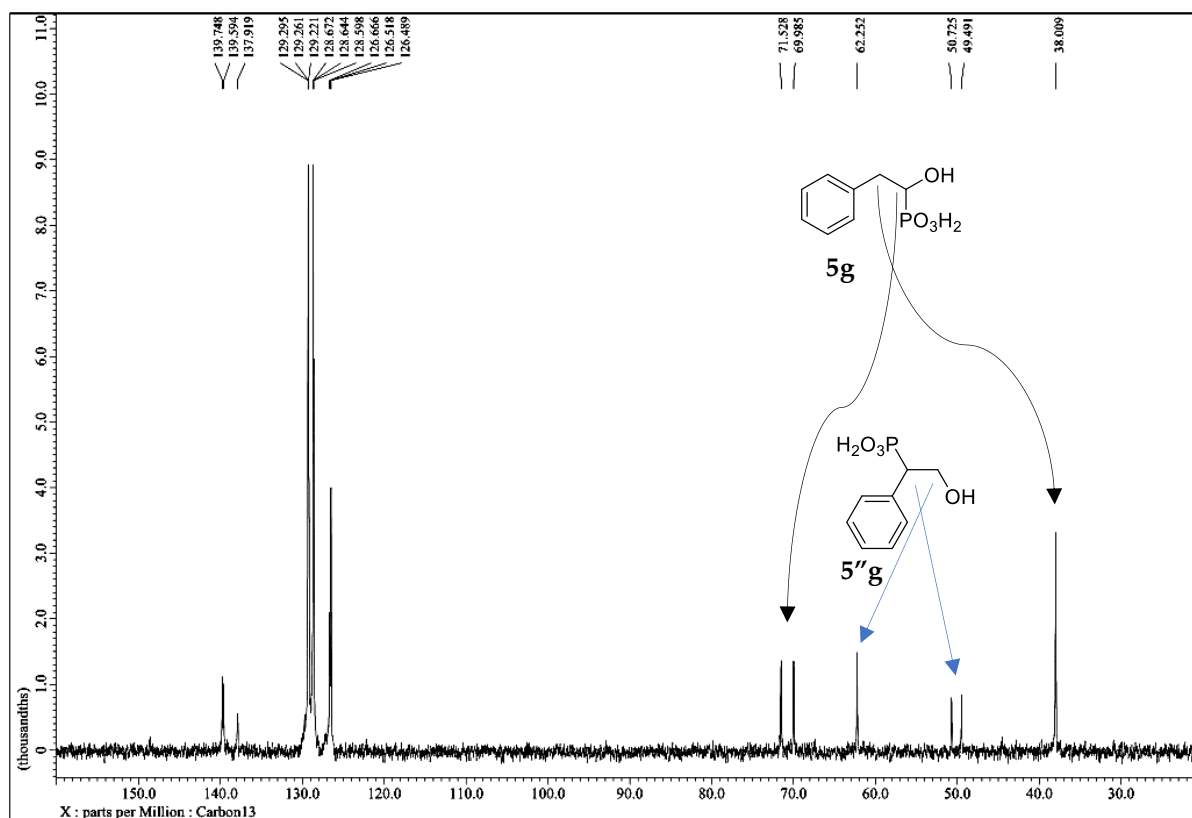

**Figure S67.**  $^{13}\text{C}\{^1\text{H}\}$  NMR (D<sub>2</sub>O, 100MHz) spectra of the concentrated post-reaction mixture of 1-amino-2-phenylethylphosphonic acid (**1g**) with NaNO<sub>2</sub> after 360h.

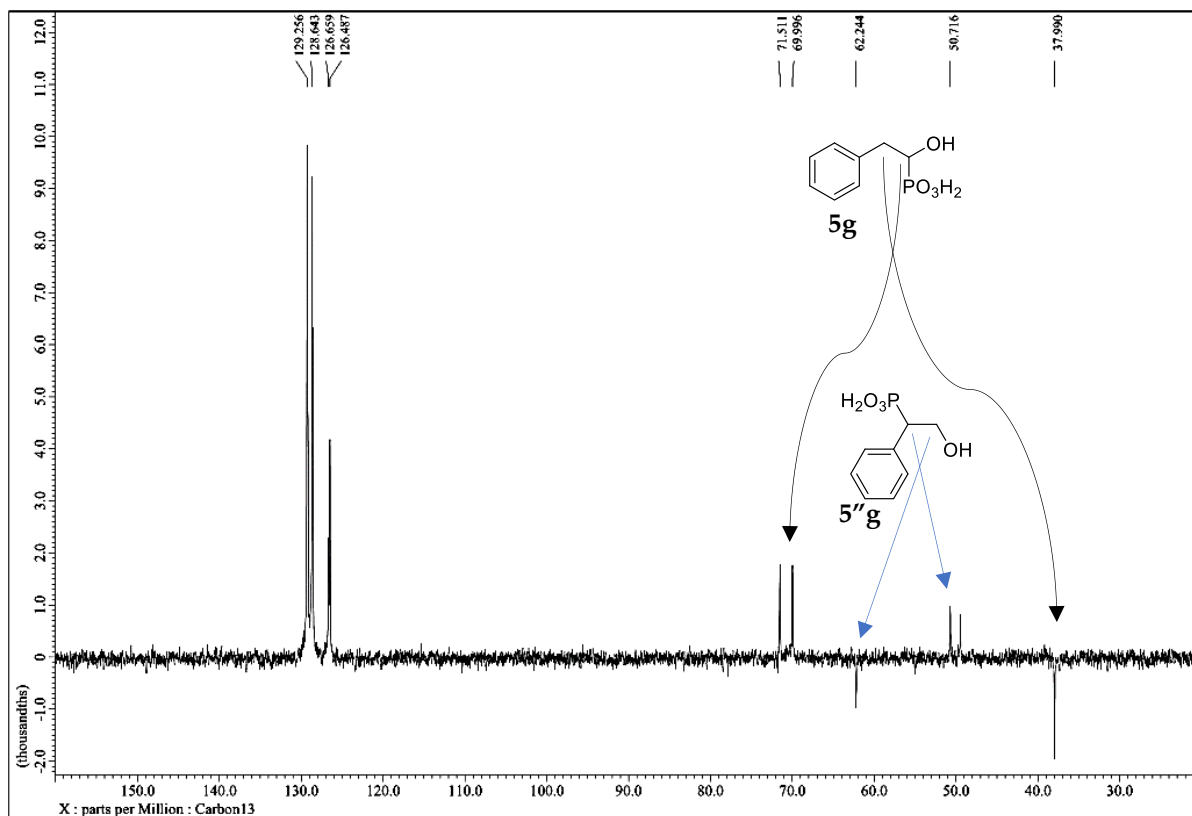

**Figure S68.** Dept-135 (D<sub>2</sub>O) spectra of the concentrated post-reaction mixture of 1-amino-2-phenylethylphosphonic acid (**1g**) with NaNO<sub>2</sub> after 360h..

3.17. ABr1248. Deamination of **1e** in Water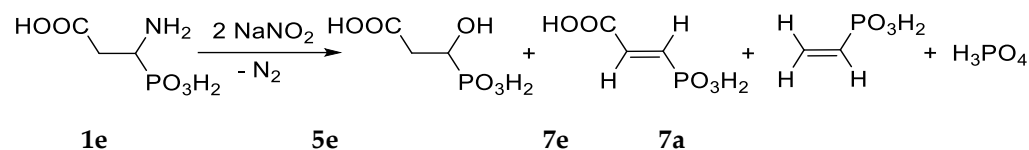

|                           |                 |           |           |            |         |
|---------------------------|-----------------|-----------|-----------|------------|---------|
| 48h                       | $\alpha = 0.71$ | 55%       | 6%        | 6%         | 4%      |
| 264h                      | $\alpha = 0.86$ | 70%       | 6%        | 6%         | 4%      |
| $\delta_{\text{P}}$ [ppm] | 12.23(dt)       | 19.07(dt) | 13.11(dd) | 10.65(ddd) | 0.64(s) |

After 48h at 21 °C, post-reaction mixture contained 3-hydroxy-3-phosphonopropanoic acid (**5e**) (55%molP), (*E*)-3-phosphonoacrylic acid (**7e**) (6%molP), vinylphosphonic acid (**7a**) (6%molP), orthophosphoric acid (4%molP) and unreacted substrate **1e** (29%molP).

After 264h post-reaction mixture contained 3-hydroxy-3-phosphonopropanoic acid (**5e**) (70%molP), (*E*)-3-phosphonoacrylic acid (**7e**) (6%molP), vinylphosphonic acid (**7a**) (6%molP), orthophosphoric acid (4%molP) and unreacted substrate **1e** (14%molP) (Figure S69 and Figure S70).

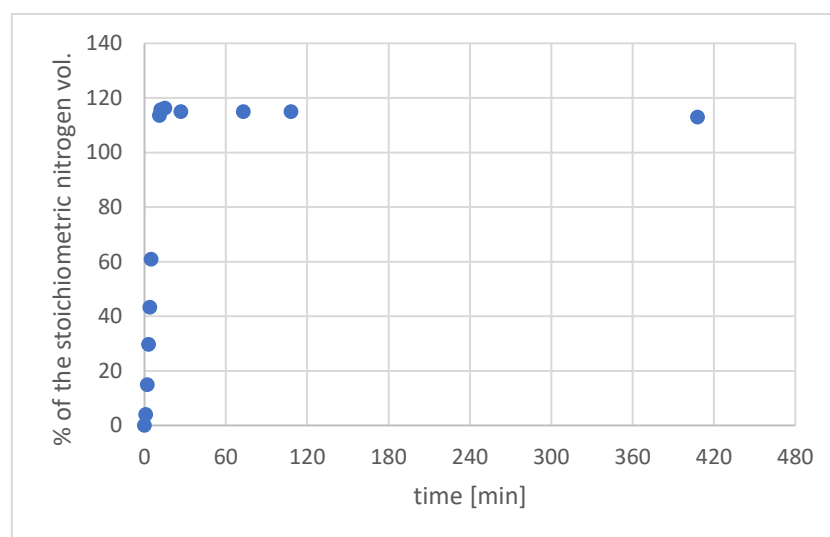

**Chart 15.** Dependence of the volume of the released gas (in % of the stoichiometric nitrogen volume) on the time in the reaction of 3-amino-3-phosphonopropanoic acid (**1e**) with NaNO<sub>2</sub> in water.

Spectra of 3-hydroxy-3-phosphonopropanoic acid (**5e**) has been not described in the literature therefore this compound was identified by comparing chemical shifts, multiplicity and coupling constants on <sup>1</sup>H and <sup>31</sup>P NMR spectra with description of structurally similar 1-hydroxy-2-phenylethylphosphonic acid (**5g**), which was obtained in reaction of 1-amino-2-phenylethylphosphonic acid (**1g**) with NaNO<sub>2</sub> (ABr1236) (Table S22). (*E*)-3-phosphonoacrylic acid (**7e**) and vinylphosphonic acid (**7a**) were identified by comparing chemical shifts, multiplicity and coupling constants on <sup>1</sup>H and <sup>31</sup>P NMR spectra with description in the literature (Table S23).

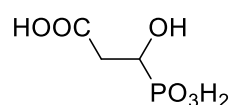

**3-Hydroxy-3-phosphonopropanoic acid (5e).** <sup>31</sup>P NMR (D<sub>2</sub>O):  $\delta$  19.07 (dt, <sup>2</sup>J<sub>H-P</sub> = 8.0 Hz, <sup>3</sup>J<sub>H-P</sub> = 8.0 Hz, <sup>3</sup>J<sub>H-P</sub> = 5.6 Hz); <sup>1</sup>H NMR (D<sub>2</sub>O):  $\delta$ : 3.99 (ddd, 1H, <sup>3</sup>J<sub>H-H</sub> = 11.0 Hz, <sup>2</sup>J<sub>H-P</sub> = 8.0 Hz, <sup>3</sup>J<sub>H-H</sub> = 2.8 Hz), 2.63 (ddd, 1H, <sup>2</sup>J<sub>H-H</sub> = 15.9 Hz, <sup>3</sup>J<sub>H-P</sub> = 5.5 Hz, <sup>3</sup>J<sub>H-H</sub> = 2.8 Hz), 2.42 (ddd, 2H, <sup>2</sup>J<sub>H-H</sub> = 16.0 Hz, <sup>3</sup>J<sub>H-H</sub> = 11.0 Hz, <sup>3</sup>J<sub>H-P</sub> = 7.6 Hz).

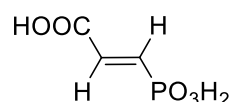

**(E)-3-phosphonoacrylic acid (7e).**  $^{31}\text{P}$  NMR ( $\text{D}_2\text{O}$ ):  $\delta$  10.65 (dd,  $J_{\text{H-P}} = 19.6$  Hz,  $J_{\text{H-P}} = 17.8$  Hz);  $^1\text{H}$  NMR ( $\text{D}_2\text{O}$ ):  $\delta$ : 6.58 (dd, 1H,  $J_{\text{H-P}} = 17.1$  Hz,  $^3J_{\text{H-H}} = 17.1$  Hz), 6.30 (dd, 1H,  $J_{\text{H-P}} = 19.6$  Hz,  $^3J_{\text{H-H}} = 17.4$  Hz).

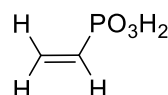

**Vinylphosphonic acid (7a).**  $^{31}\text{P}$  NMR ( $\text{D}_2\text{O}$ ):  $\delta$  13.11 (ddd,  $^3J_{\text{H-P(trans)}}$  = 47.0 Hz,  $^3J_{\text{H-P(cis)}}$  = 23.4 Hz,  $^2J_{\text{H-P}} = 20.6$  Hz);  $^1\text{H}$  NMR ( $\text{D}_2\text{O}$ ):  $\delta$ : 6.02 (ddd, 1H,  $^2J_{\text{H-P}} = 20.9$  Hz,  $^3J_{\text{H-H}} = 18.8$  Hz,  $^3J_{\text{H-H}} = 12.5$  Hz), 5.82 (ddd, 1H,  $^3J_{\text{H-P(cis)}}$  = 23.8 Hz,  $^3J_{\text{H-H}} = 18.8$  Hz,  $^2J_{\text{H-H}} = 2.5$  Hz), 5.71 (ddd, 1H,  $^3J_{\text{H-P(trans)}}$  = 46.9 Hz,  $^3J_{\text{H-H}} = 12.7$  Hz,  $^2J_{\text{H-H}} = 2.5$  Hz).

**Table S22.** Comparison of chemical shifts and coupling constants on  $^1\text{H}$  and  $^{31}\text{P}$  NMR spectra of 3-hydroxy-3-phosphonopropanoic (**1e**) with 1-hydroxy-2-phenylethylphosphonic acid (**5g**) (ABr1236).

| Structure           |                                                                                                                                |                                                                                                                              |
|---------------------|--------------------------------------------------------------------------------------------------------------------------------|------------------------------------------------------------------------------------------------------------------------------|
| Source              | ABr1248                                                                                                                        | ABr1236                                                                                                                      |
| Solvent             | $\text{D}_2\text{O}$                                                                                                           | $\text{D}_2\text{O}$                                                                                                         |
| $^{31}\text{P}$ NMR | 19.07 (dt, $J = 8.0, 5.6\text{Hz}$ )                                                                                           | 18.22 (m, $J = 6.9$ Hz)<br>7.27-7.30 (4H, m)<br>7.22-7.27 (m, 1H)                                                            |
| $^1\text{H}$ NMR    | 3.99 (ddd, 1H, $J = 11.0, 8.0, 2.8$ Hz)<br>2.63 (ddd, 1H, $J = 15.9, 5.5, 2.8$ Hz)<br>2.42 (ddd, 2H, $J = 16.0, 11.0, 7.6$ Hz) | 3.77 (ddd, 1H, $J = 7.5, 3.1, 9.6$ Hz)<br>3.07 (ddd, 1H, $J = 14.4, 3.1, 3.4$ Hz)<br>2.66 (ddd, 1H, $J = 14.4, 9.6, 7.8$ Hz) |

**Table S23.** Comparison of chemical shifts and coupling constants on  $^1\text{H}$  and  $^{31}\text{P}$  NMR spectra of the reaction products of 3-amino-3-phosphonopropanoic (**1e**) with  $\text{NaNO}_2$  with compounds described in the literature.

| Structure           |                                         |                                              |                                                |                                                |
|---------------------|-----------------------------------------|----------------------------------------------|------------------------------------------------|------------------------------------------------|
| Source              | ABr1248                                 | Reference [22]                               | ABr1248                                        | Reference [6]                                  |
| Solvent             | D <sub>2</sub> O                        | D <sub>2</sub> O (trisodium salt)            | D <sub>2</sub> O                               | CDCl <sub>3</sub>                              |
| <sup>31</sup> P NMR | 10.65 (dd, <i>J</i> = 19.6, 17.8 Hz)    | 13.88                                        | 13.11 (ddd, <i>J</i> = 47.0, 23.4, 20.6 Hz)    | 17.3 (ddd, <i>J</i> = 20.0, 20.5, 51.3 Hz)     |
| <sup>1</sup> H NMR  | 6.58 (t, 1H, <i>J</i> = 17.1 Hz)        | 7.22-7.08 (dd, 1H, <i>J</i> = 12.4, 17.1 Hz) | 6.02 (ddd, 1H, <i>J</i> = 20.9, 18.8, 12.5 Hz) | 6.31 (ddd, 1H, <i>J</i> = 20.5, 16.2, 4.5 Hz)  |
|                     | 6.30 (dd, 1H, <i>J</i> = 19.6, 17.4 Hz) | 5.70-5.82 (dd, 1H, <i>J</i> = 9.0, 7.6 Hz)   | 5.82 (ddd, 1H, <i>J</i> = 23.8, 18.8, 2.5 Hz)  | 6.05 (ddd, 1H, <i>J</i> = 51.3, 11.2, 4.5 Hz), |
|                     |                                         |                                              | 5.71 (ddd, 1H, <i>J</i> = 46.9, 12.7, 2.5 Hz)  | 6.02 (ddd, 1H, <i>J</i> = 20.0, 16.2, 11.2 Hz) |

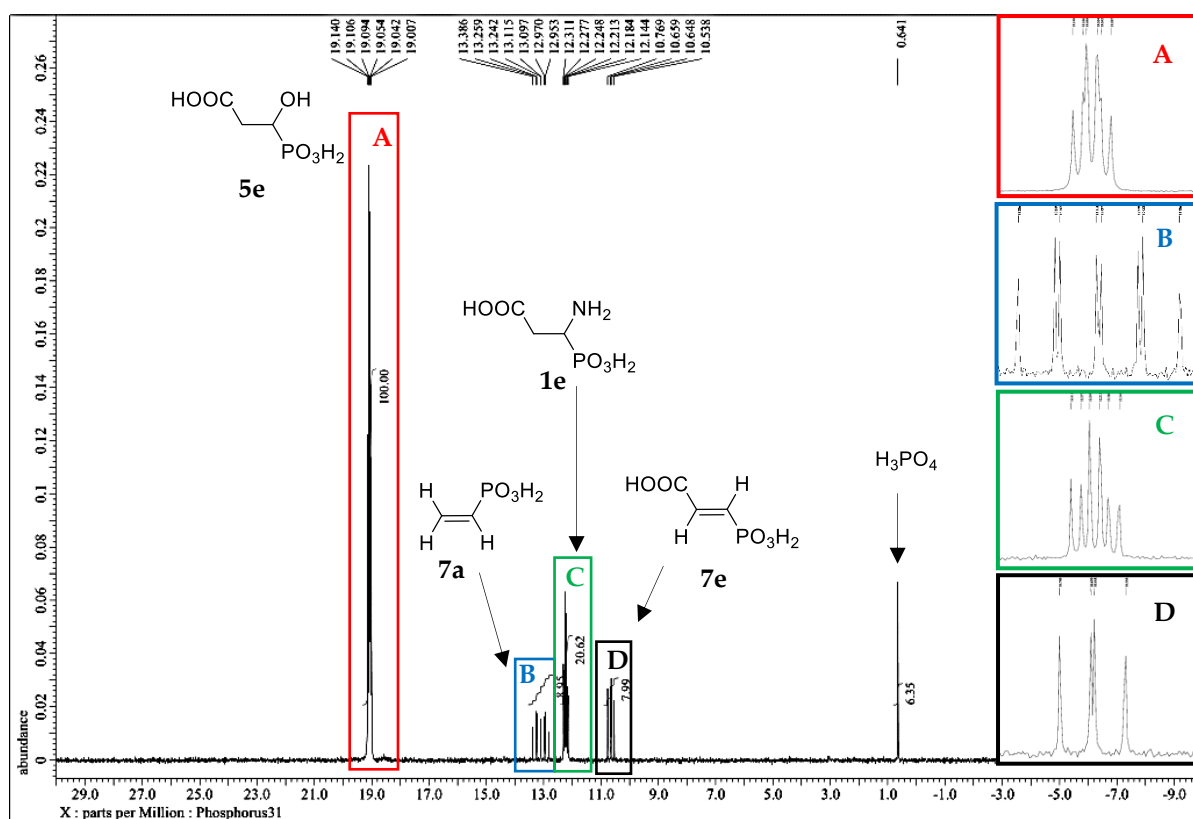

**Figure S69.**  $^{31}\text{P}$  NMR (D<sub>2</sub>O, 162MHz) spectra of the crude post-reaction mixture of 3-amino-3-phosphonopropanoic acid (**1e**) with NaNO<sub>2</sub> after 264h.

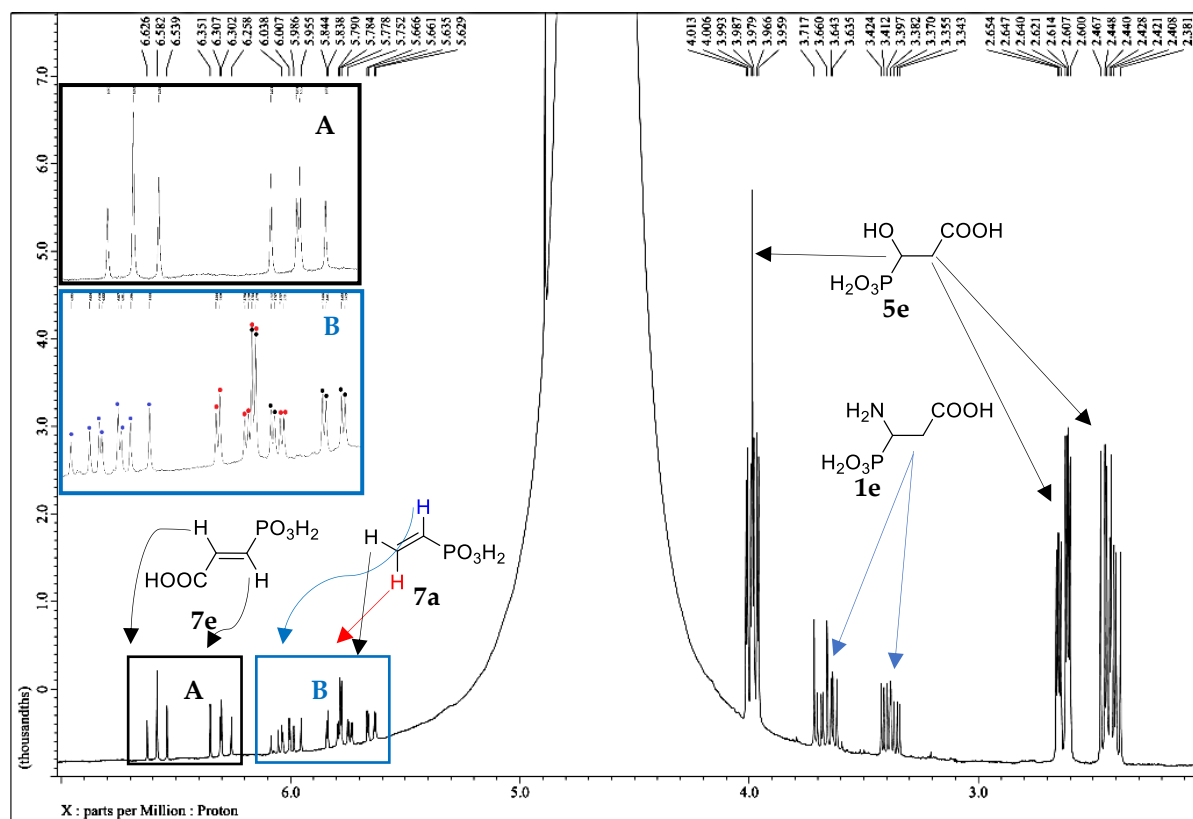

**Figure S70.**  $^1\text{H}$  NMR (D<sub>2</sub>O, 400MHz) spectra of the crude post-reaction mixture of 3-amino-3-phosphonopropanoic acid (**1e**) with NaNO<sub>2</sub> after 264h. .



**Table S24.** Comparison of structures and chemical shifts of 1-hydroxyalkylphosphonic acids **5** and 2-hydroxyalkylphosphonic acids **5'** on  $^{31}\text{P}$  NMR spectra of crude post-reaction mixtures of 1-aminoalkylphosphonic acids with  $\text{NaNO}_2$  in water.

| Structure | $^{31}\text{P}$ NMR (D <sub>2</sub> O) | Structure | $^{31}\text{P}$ NMR (D <sub>2</sub> O) | Structure | $^{31}\text{P}$ NMR (D <sub>2</sub> O) |
|-----------|----------------------------------------|-----------|----------------------------------------|-----------|----------------------------------------|
|           | 17.23 (d)                              |           | 23.84 (septet)                         |           | 21.67 (tt)                             |
|           | 17.27 (d)                              |           | 24.18 (ddq)                            |           | 21.24 (t)                              |
|           | 18.50 (t)                              |           | 24.06 (dq)                             |           | 26.36 (dq)                             |
|           | 21.33 (dq)                             |           | 24.18 (tq)                             |           | 26.44 (dq)                             |
|           | 20.96 (dt)                             |           | 23.47 (dq)                             |           | 18.96 (ddd)                            |
|           | 20.57 (dd)                             |           | 23.88 (br s)                           |           |                                        |
|           | 19.91 (d)                              |           | 20.28 (q)                              |           |                                        |
|           | 21.58 (dd)                             |           |                                        |           |                                        |
|           | 19.59 (ddd)                            |           |                                        |           |                                        |
|           | 19.07 (dd)                             |           |                                        |           |                                        |

**Table S25.** Comparison of structures and chemical shifts of vinylphosphonic acid derivatives **7** and **7'** on  $^{31}\text{P}$  NMR spectra of crude post-reaction mixtures of 1-aminoalkylphosphonic acids **1** with  $\text{NaNO}_2$  in water.

| 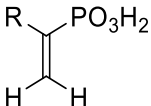   | $^{31}\text{P}$ NMR<br>( $\text{D}_2\text{O}$ ) |  | $^{31}\text{P}$ NMR<br>( $\text{D}_2\text{O}$ ) |  | $^{31}\text{P}$ NMR ( $\text{D}_2\text{O}$ ) |
|-------------------------------------------------------------------------------------|-------------------------------------------------|-----------------------------------------------------------------------------------|-------------------------------------------------|-------------------------------------------------------------------------------------|----------------------------------------------|
|    | 12.9 (ddd)                                      |  | 13.84 (ddq)                                     |  | 17.47 (dq)                                   |
|    | 15.31 (ddq)                                     |  | 14.90 (ddd)                                     |  | 17.87 (ddq)                                  |
|    | 15.63 (ddt)                                     |  | 13.38 (dd)                                      |  | 16.91 (dq)                                   |
|    | 15.84 (ddd)                                     |  | 13.11 (dd)                                      |  | 16.25 (doublet of quintets)                  |
|   | 15.6 (ddt)                                      |                                                                                   |                                                 |                                                                                     |                                              |
|  | 14.53 (ddt)                                     |                                                                                   |                                                 |                                                                                     |                                              |

#### 4. References

- Soroka, M. Comments on the synthesis of aminomethylphosphonic acid. *Synthesis* **1989**, *7*, 547–548.
- Soroka, M.; Mastalerz, P. The synthesis of phosphonic and phosphinic analogs of aspartic acid and asparagine. *Rocz. Chem.* **1976**, *50*, 661–666.
- Soroka, M. The synthesis of 1-aminoalkylphosphonic acids. A revised mechanism of the reaction of phosphorus trichloride, amides and aldehydes or ketones in acetic acid (Oleksyszyn reaction). *Liebigs Ann. Chem.* **1990**, *1990*, 331–334.
- Goldeman, W.; Soroka, M. The preparation of dialkyl 1-hydroxyalkylphosphonates in the reaction of trialkyl phosphites with oxonium salts derived from aldehydes or ketones. *Synthesis* **2006**, *2006*, 3019–3024.
- Koppenhoefer, B.; Schuring, V. (S)-2-Chloroalkanoic acids of high enantiomeric purity from (S)-2-amino acids: (S)-2-Chloropropanoic acid. *Org. Synth.* **1988**, *66*, 151–151.
- Sainz-Diaz, C.I.; Galvez-Ruano, E.; Hernandez-Laguna, A.; Bellanato, J. Synthesis, Molecular Structure, and Spectroscopical Properties of Alkenylphosphonic Derivatives. 1. Vinyl-, Propenyl-, (Bromoalkenyl)-, and (Cyanoalkenyl)phosphonic Compounds. *J. Org. Chem.* **1995**, *60*, 74–83.
- Fitch, S.J.; Moedritzer, K. Nuclear magnetic resonance study of the P-C(OH)-P to P-CO-P rearrangement: Tetraethyl-1-hydroxyalkylidenediphosphonates. *J. Am. Chem. Soc.* **1962**, *84*, 1876–1879.
- Chang, W.-Ch.; Mansoorabadi, S.O.; Liu, H.-W. Reaction of HppE with Substrate Analogues: Evidence for Carbon-Phosphorus Bond Cleavage by a Carbocation Rearrangement. *J. Am. Chem. Soc.* **2013**, *135*, 8153–8156.
- Liu, P.; Murakami, K.; Seki, T.; He, X.; Yeung, S.M.; Kuzuyama, T.; Seto, H.; Liu, H.W. Protein Purification and Function Assignment of the Epoxidase Catalyzing the Formation of Fosfomycin. *J. Am. Chem. Soc.* **2001**, *123*, 4619–4620.
- Baltser, A.E.; Zaitsev, D.A.; Ivanova, T.V.; Babenko, T.G.; Barskova, E.N. Addition of morpholine and pyrrolidine to isopropenylphosphonic acid in situ. *Russ. J. Org. Chem.* **2013**, *49*, 627–628.
- Blazis, V.J.; Koeller, K.J.; Spilling, Ch. D. Reactions of chiral phosphorous acid diamides: The asymmetric synthesis of chiral  $\alpha$ -hydroxy phosphonamides, phosphonates, and phosphonic acids. *J. Org. Chem.* **1995**, *60*, 931–940.

12. Zhou, S.; Pan, J.; Davis, K.M.; Schaperdorth, I.; Wang, B.; Boal, A.K.; Krebs, C.; Bollinger, J.M. Steric enforcement of cis-epoxide formation in the radical C–O-coupling reaction by which (S)-2-hydroxypropyl-phosphonate epoxidase (HppE) produces Fosfomycin. *J. Am. Chem. Soc.* **2019**, *141*, 20397–20406.
13. Hudson, H.R.; Ismail, F.; Pianka, M.; Wan, Ch.-W. The formation of  $\alpha$ -amino- and  $\alpha$ -hydroxyalkanephosphonic acids in the reactions of phosphite esters with aldehydes and alkyl carbamates. *Phosphorus, Sulfur and Silicon and the Related Elements* **2000**, *164*, 245–257.
14. Oehler, E.; Kanzler, S. Synthesis of phosphonic acids related to the antibiotic fosmidomycin from allylic  $\alpha$ - and  $\gamma$ -hydroxyphosphonates. *Phosphorus, Sulfur and Silicon and the Related Elements* **1996**, *112*, 71–90.
15. Quast, H.; Heuschmann, M. Three-membered heterocycles. 12. Synthesis of a phosphirane oxide. *Liebigs Annalen der Chemie*, **1981**, *5*, 977–992.
16. Kenyon, G.L.; Westheimer, F.H. Stereochemistry of unsaturated phosphonic acids. *J. Am. Chem. Soc.* **1966**, *88*, 3557–3561.
17. Prishchenko, A.A.; Livantsov, M.V.; Novikova, O.P.; Livantsova, L.I.; Petrosyan, V.S. Synthesis of new functionalized aryl-substituted methylphosphonic and methylenediphosphonic acids and their derivatives. *Heteroat. Chem.* **2016**, *27*, 381–388.
18. Rueppel, M.L.; Marvel, J.T. Proton and phosphorus-31P NMR spectra of substituted methylphosphonic acids with indirect determination of phosphorus-31P shifts. *Org. Magn. Reson.* **1976**, *8*, 19–20.
19. Yan, F.; Moon, S.-J.; Liu, P.; Zhao, Z.; Lipscomb, J.D.; Liu, A.; Liu, H.-W. Determination of the Substrate Binding Mode to the Active Site Iron of (S)-2-Hydroxypropylphosphonic Acid Epoxidase Using <sup>17</sup>O-Enriched Substrates and Substrate Analogues, *Biochemistry* **2007**, *46*, 12628–12638.
20. Chen, R.; Breuer, E. Direct Approach to  $\alpha$ -Hydroxyphosphonic and  $\alpha,\omega$ -Dihydroxyalkane- $\alpha,\omega$ -bisphosphonic Acids by the Reduction of (Bis)acylphosphonic Acids. *J. Org. Chem.* **1998**, *63*, 5107–5109.
21. Saha, U.; Helvig, Ch. F.; Petkovich, P.M. Phosphate Management with Small Molecules. US 9198923, 1 December 2015.
22. De Macedo Puyau, P.; Perie, J.J. Synthesis Of Substrate Analogues And Inhibitors For The Phosphoglycerate Mutase Enzyme, *Phosphorus, Sulfur Silicon Relat. Elem.* **1997**, *129*, 13–45.
